# Supplementary material for: Protocol for the cultural adaptation of pulmonary rehabilitation and subsequent testing in a randomised controlled feasibility trial for adults with chronic obstructive pulmonary disease in Sri Lanka
Source: PubMed Central journal article supplement (PMC7692826; doi:10.1136/bmjopen-2020-041677), 2020-11-26
Supplement: bmjopen-2020-041677.draft_revisions.pdf [file bmjopen-2020-041677.draft_revisions.pdf]

# BMJ Open

BMJ Open is committed to open peer review. As part of this commitment we make the peer review history of every article we publish publicly available.

When an article is published we post the peer reviewers' comments and the authors' responses online. We also post the versions of the paper that were used during peer review. These are the versions that the peer review comments apply to.

The versions of the paper that follow are the versions that were submitted during the peer review process. They are not the versions of record or the final published versions. They should not be cited or distributed as the published version of this manuscript.

BMJ Open is an open access journal and the full, final, typeset and author-corrected version of record of the manuscript is available on our site with no access controls, subscription charges or pay-per-view fees (<http://bmjopen.bmj.com>).

If you have any questions on BMJ Open's open peer review process please email [info.bmjopen@bmj.com](mailto:info.bmjopen@bmj.com)

# BMJ Open

## Protocol for the cultural adaptation of Pulmonary Rehabilitation and subsequent testing in a Randomised Controlled Feasibility Trial for Adults with Chronic Obstructive Pulmonary Disease in Sri Lanka

|                               |                                                                                                                                                                                                                                                                                                                                                                                                                                                                                                                                                                                                                                                                                                                                                                                                                                                                                                                                                                                                                                                                                                                                                                                                                                                                                                                                                                                                                                                                                                                                                                                                                                                                                                                                                                                                                                                                                                                                                                                                                                                                                                                                                               |
|-------------------------------|---------------------------------------------------------------------------------------------------------------------------------------------------------------------------------------------------------------------------------------------------------------------------------------------------------------------------------------------------------------------------------------------------------------------------------------------------------------------------------------------------------------------------------------------------------------------------------------------------------------------------------------------------------------------------------------------------------------------------------------------------------------------------------------------------------------------------------------------------------------------------------------------------------------------------------------------------------------------------------------------------------------------------------------------------------------------------------------------------------------------------------------------------------------------------------------------------------------------------------------------------------------------------------------------------------------------------------------------------------------------------------------------------------------------------------------------------------------------------------------------------------------------------------------------------------------------------------------------------------------------------------------------------------------------------------------------------------------------------------------------------------------------------------------------------------------------------------------------------------------------------------------------------------------------------------------------------------------------------------------------------------------------------------------------------------------------------------------------------------------------------------------------------------------|
| Journal:                      | <i>BMJ Open</i>                                                                                                                                                                                                                                                                                                                                                                                                                                                                                                                                                                                                                                                                                                                                                                                                                                                                                                                                                                                                                                                                                                                                                                                                                                                                                                                                                                                                                                                                                                                                                                                                                                                                                                                                                                                                                                                                                                                                                                                                                                                                                                                                               |
| Manuscript ID                 | bmjopen-2020-041677                                                                                                                                                                                                                                                                                                                                                                                                                                                                                                                                                                                                                                                                                                                                                                                                                                                                                                                                                                                                                                                                                                                                                                                                                                                                                                                                                                                                                                                                                                                                                                                                                                                                                                                                                                                                                                                                                                                                                                                                                                                                                                                                           |
| Article Type:                 | Protocol                                                                                                                                                                                                                                                                                                                                                                                                                                                                                                                                                                                                                                                                                                                                                                                                                                                                                                                                                                                                                                                                                                                                                                                                                                                                                                                                                                                                                                                                                                                                                                                                                                                                                                                                                                                                                                                                                                                                                                                                                                                                                                                                                      |
| Date Submitted by the Author: | 14-Jun-2020                                                                                                                                                                                                                                                                                                                                                                                                                                                                                                                                                                                                                                                                                                                                                                                                                                                                                                                                                                                                                                                                                                                                                                                                                                                                                                                                                                                                                                                                                                                                                                                                                                                                                                                                                                                                                                                                                                                                                                                                                                                                                                                                                   |
| Complete List of Authors:     | <p>Jayamaha, Akila; KIU, Health Sciences<br/> Perera, Chamilya; KIU, Health Sciences<br/> Orme, Mark; University Hospitals of Leicester NHS Trust, Centre for Exercise and Rehabilitation Science, NIHR Leicester Biomedical Research Centre-Respiratory; University of Leicester, Department of Respiratory Sciences<br/> Jones , Amy; University Hospitals of Leicester NHS Trust, Centre for Exercise and Rehabilitation Science, NIHR Leicester Biomedical Research Centre-Respiratory; University of Leicester, Department of Respiratory Sciences<br/> Wijayasiri, Upendra; Colombo South Teaching Hospital, Sports Medicine Unit<br/> Amarasekara, Thamara; University of Sri Jayewardenepura, Faculty of Allied Health Sciences<br/> Karunatilake, Ravini ; National Hospital of Sri Lanka, Central Chest Clinic<br/> Fernando, Amitha; National Hospital of Sri Lanka, Central Chest Clinic<br/> Seneviratne, Anthony ; Primary Care Respiratory Group<br/> Barton, Andy; University of Plymouth, Faculty of Health<br/> Jones, Rupert; University of Plymouth, Faculty of Health<br/> Miah, Ruhme ; University of Leicester, Department of Respiratory Sciences; University Hospitals of Leicester NHS Trust, Centre for Exercise and Rehabilitation Science, NIHR Leicester Biomedical Research Centre-Respiratory<br/> Malcolm, Dominic; Loughborough University, School of Sport, Exercise and Health Sciences<br/> Matheson, Jesse; University of Sheffield, Department of Economics<br/> Free, Robert; University of Leicester, Department of Respiratory Sciences,<br/> Manise, Adrian ; University of Leicester, Department of Respiratory Sciences<br/> Steiner, michael ; University of Leicester, Department of Respiratory Sciences; University Hospitals of Leicester NHS Trust, Centre for Exercise and Rehabilitation Science, NIHR Leicester Biomedical Research Centre-Respiratory<br/> Wimalasekera, Savithri; University of Sri Jayewardenepura, Faculty of Medical Sciences<br/> Singh, Sally; University of Leicester, Department of Respiratory Sciences; University Hospitals of Leicester NHS Trust, Centre for Exercise</p> |

1  
2  
3  
4  
5  
6  
7  
8  
9  
10  
11  
12  
13  
14  
15  
16  
17  
18  
19  
20  
21  
22  
23  
24  
25  
26  
27  
28  
29  
30  
31  
32  
33  
34  
35  
36  
37  
38  
39  
40  
41  
42  
43  
44  
45  
46  
47  
48  
49  
50  
51  
52  
53  
54  
55  
56  
57  
58  
59  
60

|           |                                                                                                     |
|-----------|-----------------------------------------------------------------------------------------------------|
|           | and Rehabilitation Science, NIHR Leicester Biomedical Research Centre-Respiratory                   |
| Keywords: | REHABILITATION MEDICINE, Chronic airways disease < THORACIC MEDICINE, Emphysema < THORACIC MEDICINE |
|           |                                                                                                     |

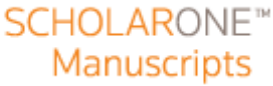

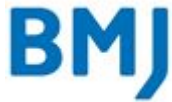

I, the Submitting Author has the right to grant and does grant on behalf of all authors of the Work (as defined in the below author licence), an exclusive licence and/or a non-exclusive licence for contributions from authors who are: i) UK Crown employees; ii) where BMJ has agreed a CC-BY licence shall apply, and/or iii) in accordance with the terms applicable for US Federal Government officers or employees acting as part of their official duties; on a worldwide, perpetual, irrevocable, royalty-free basis to BMJ Publishing Group Ltd ("BMJ") its licensees and where the relevant Journal is co-owned by BMJ to the co-owners of the Journal, to publish the Work in this journal and any other BMJ products and to exploit all rights, as set out in our [licence](#).

The Submitting Author accepts and understands that any supply made under these terms is made by BMJ to the Submitting Author unless you are acting as an employee on behalf of your employer or a postgraduate student of an affiliated institution which is paying any applicable article publishing charge ("APC") for Open Access articles. Where the Submitting Author wishes to make the Work available on an Open Access basis (and intends to pay the relevant APC), the terms of reuse of such Open Access shall be governed by a Creative Commons licence – details of these licences and which [Creative Commons](#) licence will apply to this Work are set out in our licence referred to above.

Other than as permitted in any relevant BMJ Author's Self Archiving Policies, I confirm this Work has not been accepted for publication elsewhere, is not being considered for publication elsewhere and does not duplicate material already published. I confirm all authors consent to publication of this Work and authorise the granting of this licence.

1  
2  
3  
4 **Protocol for the cultural adaptation of Pulmonary Rehabilitation and subsequent testing in**  
5 **a Randomised Controlled Feasibility Trial for Adults with Chronic Obstructive Pulmonary**  
6 **Disease in Sri Lanka**  
7  
8  
9

10 Akila R Jayamaha <sup>1</sup>, Chamilya H Perera <sup>1</sup>, Mark W Orme <sup>2,3</sup>, Amy V Jones <sup>2,3</sup>, Upendra K D C  
11 Wijayasiri<sup>4</sup>, Thamara D Amarasekara<sup>5</sup>, Ravini de S Karunatillake <sup>6</sup>, Amitha C Fernando <sup>6</sup>, Seneviratne A  
12 L P De S.<sup>7</sup>, Andy Barton <sup>8</sup>, Rupert Jones <sup>8</sup>, Ruhme B Miah<sup>2,3</sup>, Dominic Malcolm<sup>9</sup>, Jesse A Matheson <sup>10</sup>,  
13 Robert C Free<sup>3</sup>, Adrian Manise<sup>3</sup>, Michael C Steiner<sup>2,3</sup> Savithri W Wimalasekera <sup>11</sup>, Sally J Singh <sup>2,3</sup>  
14

15 Correspondence to Akila Randika Jayamaha/1226arj@gmail.com/akila@kiu.ac.lk  
16

17 **Abstract**  
18

19  
20 **Introduction** International guidelines recommend pulmonary rehabilitation (PR) should be  
21 offered to adults living with COPD, but there is limited PR available in Sri Lanka. Culturally  
22 appropriate PR needs to be designed and implemented in Sri Lanka. The study aims to adapt PR  
23 to the Sri Lankan context and determine the feasibility of conducting a future trial of the adapted  
24 PR in Sri Lanka.  
25  
26  
27

28  
29 **Methods and analysis** Phase-1: Develop the intervention: Focus groups with adults living with  
30 COPD and caregivers and in-depth interviews with healthcare professionals will be conducted to  
31 inform PR adaptations. Phase-2: Randomised controlled feasibility trial conducted in Central  
32 Chest Clinic, Colombo, Sri Lanka. Eligible participants will be identified and will be invited to  
33 take part. A total of 60 participants will be recruited to the trial and randomised (1:1) into one of  
34 two groups; control group receiving usual care or the intervention group also receiving PR. The  
35 PR programme is likely to consist of 12 sessions of exercises and health education, delivered  
36 twice weekly. After completion of PR, routine measures in both groups will be assessed by a  
37 blinded assessor. The primary outcome measure is feasibility, including assessing eligibility,  
38 uptake and completion. Phase-3: Qualitative evaluation of the trial: Focus groups with  
39 participants and in-depth interviews with PR deliverers will be conducted to further determine  
40 feasibility and acceptability of PR, as well as ability to run a larger trial.  
41  
42  
43  
44  
45  
46  
47  
48  
49  
50

51 **Ethics and dissemination** Ethical approval will be obtained from the ethics review committee of  
52 the Faculty of Medical Sciences, University of Sri Jayewardenepura, Sri Lanka and the  
53 University of Leicester, UK. The results of the trial will be disseminated through patient and  
54  
55  
56  
57  
58  
59  
60

1  
2  
3 public involvement events, local and international conference proceedings, and peer-reviewed  
4 journals.  
5

6  
7  
8 Trial registration: Phase-1) ISRCTN58273367, Phases-2 &3) ISRCTN13367735  
9

10 **Keywords:** COPD, Pulmonary Rehabilitation, Exercise, Education, Sri Lanka  
11

### 12 **Strengths and limitations**

- 14 • This study is the first examining the feasibility and acceptability of a culturally  
15 appropriate pulmonary rehabilitation programme for adults with COPD in Sri Lanka.  
16
- 17 • Taking a mixed-method approach, this study will provide a rich insight into delivering a  
18 trial of pulmonary rehabilitation in the Sri Lankan context.  
19
- 20 • This study is a single center feasibility trial. As such, whilst findings will be an important  
21 first step in understanding the potential role of pulmonary rehabilitation in Sri Lanka and  
22 low- and middle-income countries more broadly, findings may not be generalizable to  
23 other regions of the world.  
24  
25  
26  
27  
28  
29  
30  
31  
32  
33  
34  
35  
36  
37  
38  
39  
40  
41  
42  
43  
44  
45  
46  
47  
48  
49  
50  
51  
52  
53  
54  
55  
56  
57  
58  
59  
60

## INTRODUCTION

Chronic obstructive pulmonary disease (COPD) is a progressive disease characterised by airflow obstruction and breathlessness. COPD is a major cause of morbidity and mortality throughout the world, corresponding to 6% of all deaths worldwide.<sup>1</sup> Further, more than 90% of COPD deaths occur in low and middle-income countries.<sup>2</sup> The most recent estimate of COPD prevalence in South Asia was 6.3%<sup>3</sup> with a prevalence in Sri Lanka of 10.5%,<sup>4</sup> similar to the estimated global COPD prevalence of 11.7%.<sup>5</sup> COPD is a significant burden to both patients and healthcare services.<sup>6</sup>

Chronic cough with sputum, breathlessness, physical inactivity and exercise intolerance resulting from dyspnoea or fatigue are common consequences of COPD.<sup>1</sup> Symptoms of COPD progressively worsen and people can become breathless, even at rest. Daily activities often become difficult as the condition worsens, impacting their quality of life.<sup>7</sup> The impact of COPD to the individual and to society makes the need for interventions to reverse the associated disability of paramount importance.

The development of rehabilitation in low-income and middle-income countries will ensure the Universal Health Coverage.<sup>8</sup> International guidelines recommend that pulmonary rehabilitation (PR) should be routinely offered to patients with chronic respiratory disease who have persistent symptoms, limited activity, and/or are unable to adjust to illness.<sup>9</sup> It is a low cost, high impact intervention that improves the quality of life, reduces suffering, reduces mortality and reduces economic loss, relieves dyspnoea and fatigue, improves exercise capacity, improves psychological and emotional function, and enhances an individual's self-management of their condition.<sup>1</sup> Having realised the benefits of PR in COPD, Western countries have incorporated this as an important structural component of healthcare delivery services.<sup>10</sup> Implementation of PR based as practiced in Western countries in Sri Lanka requires adaptation to the local health service, population and culture. Despite its effectiveness, there is a significant need to understand the feasibility of conducting PR in low resource Sri Lankan health care setting and the acceptability of PR among Sri Lankan adults living with COPD and healthcare staff involved in its delivery. Uptake and completion of PR even in Western countries is an on-going challenge.<sup>11</sup> The need to maximize appeal of PR to patients and referrers is a global issue and one that is

likely to be specific to a given location and population. There remains an unmet need for PR in Sri Lanka. To be successful, PR must be not only evidence-based, but also designed and implemented in a manner sensitive to the context in which it is being delivered, such as culture and geography. Therefore, the aim of this study is to devise an appropriate PR programme and then determine the feasibility and acceptability of this programme for adults living with COPD in Sri Lanka and assess the potential for a future trial of its effectiveness.

The objectives of the study are to:

1. Explore the needs and perceptions of adults living with COPD, their care-givers /family members and health care professionals to inform the adaptations required for a PR programme suitable for the Sri Lankan context.
2. Determine the feasibility of conducting adapted hospital-based PR for people living with COPD.
3. Assess the acceptability of the PR among Sri Lankan adults living with COPD and healthcare staff involved in its delivery.
4. Describe any changes in health of the adults living with COPD following completion of PR.
5. Assess the feasibility of a future trial and estimate the required sample size.

## **METHODS AND ANALYSIS**

### **Study design and registration**

The proposed study will be conducted in three phases. Phase 1: A qualitative study will be conducted to inform the adaptations required to make PR specific to the Sri Lankan context. Phase 2 is a single blind randomised control feasibility trial. Adults living with COPD will be randomised (1:1) into adapted PR or usual care. Phase 3: Qualitative evaluation of the trial to determine the feasibility and acceptability of PR deliverers and participants. The trial will be conducted, analysed and reported according to the Standard Protocol Items: Recommendations for Interventional Trials (SPIRIT) statement<sup>12</sup> and trial has been registered on the ISRCTN website. The design of the study and flow of participant enrolment is presented in figure 1.



### Study setting

The study will be carried out at the Central Chest Clinic, Colombo, Sri Lanka which is a leading health care facility that provides treatment for adults with respiratory disease. A room allowing confidential discussions will be used for conducting focus group discussions among adults living with COPD, their caregivers /family members, and nurses. Semi structured interviews will be conducted among doctors and physiotherapists in the conference hall (which is quiet and not used routinely for work) or consultation rooms as convenient to them and without interfering with their routine work. The venue for PR will be a large room at the Central Chest Clinic.

### Participants

Key informants and suitable participants for phase 1 of the study will be identified by the researchers with the help of health care professionals involved in the treatment of COPD at Central Chest Clinic. Suitable participants (adults living with COPD, their caregivers /family members, nurses, doctors, physiotherapists) will be selected using purposive sampling method. Multi-religious and multi-ethnic Sri Lankan cultural diversity and gender will be considered when recruiting to the study. Participants who provide written informed consent will be enrolled in the study.

After the adaptation of PR in phase 1, suitable participants for the Phase 2 randomised controlled feasibility trial will be identified by the Medical Officers in the Chest Clinic and will be invited to take part in an eligibility assessment. This assessment will determine eligibility for entry into the study. People eligible for inclusion in the trial will be: aged  $\geq 18$  years, will have a clinically confirmed diagnosis of COPD by a physician, confirmed COPD with spirometry based on GOLD criteria with  $FEV_1/FVC < 0.7$ , and  $FEV_1 < 80\%$  predicted,  $\geq 1$  exacerbation per year, mMRC grade  $\geq 2$  and willing to provide informed consent. Adults with comorbidities such as severe or unstable cardiovascular, other internal diseases and locomotor difficulties that preclude the exercise or malignant disease or other serious illness which will interfere with participation in the PR, will be excluded from the study. Individuals not eligible for the study will be recorded on a study screening log.

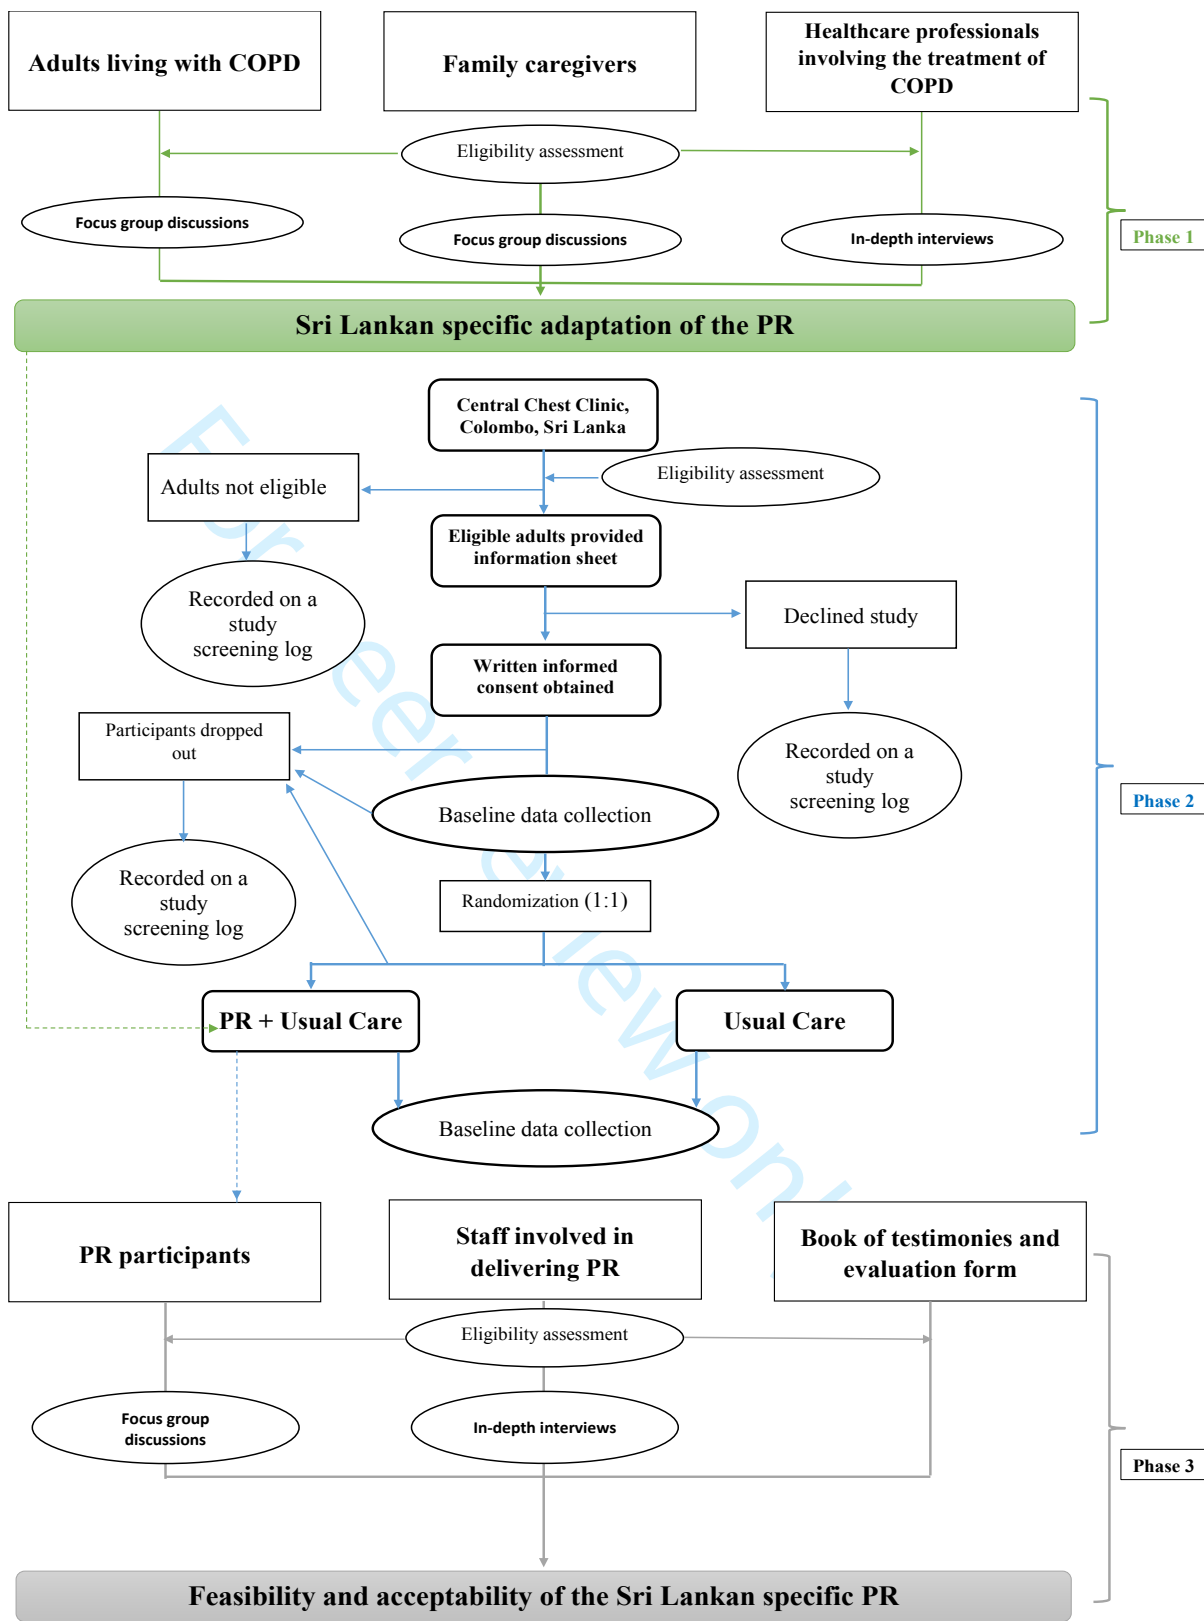

Figure 1: Flow of participant of the three phases of the study

## Procedure

Eligible participants will be informed verbally about the study by the Medical Officers of the Central Chest Clinic. After receiving a study information sheet, potential participants will be contacted to arrange an appointment, if they wish to take part. An opportunity to ask questions will be provided. If willing to take part in the study, they will be asked to provide written informed consent. Information regarding the interest of participation in the study will be taken as field notes. Baseline outcome measures will be assessed. After baseline data collection, participants will be randomised (1:1) into two groups. One group will receive usual care and PR and the other group will receive only usual care which consists of pharmacological treatment and brief information about disease condition, medication and inhaler techniques. Experiences of the participants and PR deliverers regarding the acceptability and feasibility of PR will be explored in interviews and focus groups during Phase 3 of the study. Participants who did not complete the PR will be asked to take part in a drop-out interview and information provided freely by the participants will be collected as field notes.

## Trial interventions

### Intervention: Adapted pulmonary rehabilitation

Sri-Lankan specific PR will comprise the core elements of an evidence based rehabilitation, a programme of exercises<sup>13, 14</sup> and health education.<sup>13, 14, 15</sup> The detail of delivery and adaptations of PR will be informed by collecting the views and opinions from adults living with COPD, their family caregivers, and healthcare professionals. PR is typically a 6-week rolling programme and consisting of 12 sessions in total, delivered twice a week.<sup>13, 14</sup> Sessions usually last approximately two hours, with one hour for exercise training and one hour for education. The duration of the PR trial and frequency and duration of sessions will be discussed during Phase 1. All staff delivering PR will be trained and assisted by a nursing officer, a clinical nutritionist, an exercise physician and a physiotherapist. The venue for PR will be at the Central Chest Clinic, Colombo, Sri Lanka. The Central Chest Clinic will have a maximum capacity of 10 patients per PR class. The equipment required will be simple and include chairs, weights, and simple exercise equipment based on local availability, suitability and informed by qualitative work.<sup>16</sup>

In keeping with evidence-based guidelines<sup>13, 14</sup>, discussions in Phase 1 will include the core exercise component of PR, notably resistance training (e.g. upper and lower limbs) and aerobic training (walking, sit-to-stand, step-ups) using minimal equipment and education. Each participant's exercise regimen will be individually prescribed and progressed<sup>17</sup> with walking speed will be prescribed using the ISWT.<sup>18</sup> The process in which this is achieved by patients will be informed by Phase 1. The education component will be delivered by an interdisciplinary team and will be informed by qualitative findings from Phase 1 with discussions facilitated by usual education topics as described in guidelines.<sup>13, 14</sup>

### Usual care

Usual care will consist of pharmacological treatment and optimization, prescribed to patients after consultation with Medical Officers at the Central Chest Clinic. Brief information about disease condition, medication and inhaler techniques will be provided by Medical Officers and Nurses. Pulmonary rehabilitation or any form of exercise recommendation is not part of usual care.

### Outcomes

#### Primary outcome

The primary outcome of the trial will be the feasibility and the acceptability of the PR intervention.

#### Feasibility

Measures to assess feasibility are provided in table 1 and include the comprehensive assessment of the feasibility of patient recruitment and the intervention delivery.

**Table 1: Primary outcome measures- Feasibility and operational experience assessment**

| Feasibility of patient recruitment                   | Data sources                                                |
|------------------------------------------------------|-------------------------------------------------------------|
| Feasibility of screening and recruiting participants | Interviews with the healthcare professionals, screening log |
| Suitability of the inclusion criteria                | Interviews with the healthcare professionals, screening log |

|                                                                                                                                                                                                                                              |                                                                                                         |
|----------------------------------------------------------------------------------------------------------------------------------------------------------------------------------------------------------------------------------------------|---------------------------------------------------------------------------------------------------------|
| Number of eligible patients, number of patients screened, number of patients invited to take part, actual number of participants who consent to take part                                                                                    | Screening log                                                                                           |
| Number of patients who refuse, drop out and the reasons for refuse and drop out                                                                                                                                                              | Interviews with the patients, screening log                                                             |
| <b>Operational experience of intervention delivery</b>                                                                                                                                                                                       |                                                                                                         |
| Service provider and multi-disciplinary teams' willingness and ability to deliver the PR                                                                                                                                                     | Interviews with healthcare professionals                                                                |
| The practicality of delivering the intervention in the proposed setting                                                                                                                                                                      | Interviews with healthcare professionals and focus groups with participants                             |
| The time needed to collect the data<br>Baseline visit- Time taken for each measure (each individual questionnaire and physical measure)<br>Follow-up visit- Time taken for each measure (each individual questionnaire and physical measure) | Interviews with the healthcare professionals, Rehabilitation records                                    |
| Data completeness and accuracy                                                                                                                                                                                                               | Interviews with the healthcare professionals, Rehabilitation records, RedCap                            |
| Adherence to home exercise                                                                                                                                                                                                                   | Interviews with the patients and self-report exercise diary                                             |
| The training and resources needed to deliver the intervention (ensuring readiness for a future much larger multi-center trial)                                                                                                               | Interviews with the healthcare professionals and focus groups with participants, Rehabilitation records |
| Description of unintended events                                                                                                                                                                                                             | Adverse events log, REDCap                                                                              |

### Acceptability

The acceptability of the PR intervention among adults living with COPD and healthcare staff involved in its delivery will be assessed. Participants' experience of the PR, including any perceived benefits, challenges and changes they would make to the programme, will be explored in qualitative interviews and focus groups after their discharge assessment or withdrawal. The experience of healthcare professionals regarding the PR intervention, such as their confidence in delivering the programme, the components of PR, structure of PR, the patient adherence to the PR exercises and how their perceptions changed over the course of the trial, will be explored in qualitative interviews at the end of the trial.

### Secondary outcomes

The secondary outcomes of this study are provided in table 2. Comparison of secondary outcome measures of baseline and post intervention, will describe any changes in the health of the adults living with COPD following completion of PR

**Table 2: Secondary outcome measures**

| Outcome measures                                                                                                        | Baseline | Post-intervention |
|-------------------------------------------------------------------------------------------------------------------------|----------|-------------------|
| Socio-demographics                                                                                                      | x        |                   |
| Lung health (spirometry data, smoking status, number of COPD exacerbations in the last year)                            | x        |                   |
| Comorbidities                                                                                                           | x        |                   |
| Treatments                                                                                                              | x        |                   |
| Nutritional status (Body Mass Index, mid upper arm circumference, skinfold thickness, self-report seven-day diet diary) | x        | x                 |
| Disease burden (MRC dyspnea grade, CAT, CCQ)                                                                            | x        | x                 |
| Economic impact of disease (WPAI)                                                                                       | x        | x                 |
| Quality of life (EQ-5D-5L)                                                                                              | x        | x                 |
| Psychological wellbeing (Hospital Anxiety and Depression scale)                                                         | x        | x                 |
| Physical function (5x sit-to-stand test)                                                                                | x        | x                 |
| Exercise capacity (ISWT, ESWT)                                                                                          | x        | x                 |
| Accelerometer assessed physical activity (ActiGraph wGT3x-BT)                                                           | x        | x                 |

MRC - Medical Research Council, CAT- COPD Assessment Test, CCQ - Clinical COPD Questionnaire, EQ-5D-5L - EuroQol Five Dimensions Five Levels, ISWT - Incremental Shuttle Walk Test, ESWT - Endurance Shuttle Walk Tests, WPAI – Work Productivity and Activity Impairment questionnaire

### Sample size and recruitment target

This study is a feasibility trial that aims to provide data for an accurate estimation of the required sample size for future trials. Therefore, a formal sample size calculation is not required. We aim to recruit and randomise 60 participants to the study (30 in each group).

### Patient allocation, concealment, and blinding

Randomisation will occur through random permuted blocks to either the intervention group (PR+ usual care) or control group (usual care) in ratio 1:1 using Sealed envelope™.

The computer-generated patient allocation sequence will be monitored by an individual who is independent of the research team and will inform the research team of group allocations via telephone. Participants will be informed about their group allocation after providing informed consent and completing baseline assessments.

1  
2  
3 It will not be possible to blind patients to their group allocation due to the nature of PR. Research  
4 staff will be blinded to outcome measures. Participants will be advised not to reveal their group  
5 during the follow-up assessment. Any episodes of un-blinding will be documented and reported.  
6  
7

## 8 9 **Data collection**

### 10 11 *Phase 1: Qualitative assessment for adaptation of PR*

#### 12 13 **Focus groups with patient and family caregivers**

14  
15 Focus groups with adults living with COPD and separate focus groups with their family  
16 members/ caregivers will be conducted until data saturation. We anticipate conducting up to 5  
17 focus groups with 6-8 participants in each. Data will be collected during patients' clinic visits.  
18 Focus group discussions will be audio-recorded, expected to last approximately 45-90 minutes,  
19 and will be conducted face-to-face by an interviewer and note-taker (observer). Focus groups  
20 will be transcribed verbatim, with identifiable information removed. Envisaged outcomes of the  
21 focus groups will include Sri Lankan specific adaptation of PR.  
22  
23  
24  
25  
26  
27  
28  
29

#### 30 31 **Interviews with healthcare professionals involving the treatment of COPD**

32  
33 Up to 15 in-depth interviews with healthcare professionals will be conducted until data  
34 saturation. Structured interviews will be conducted with healthcare professionals as convenient  
35 to them without interfering with their routine work. Interviews will be audio-recorded and will  
36 be conducted face-to-face by an interviewer. Interviews will be transcribed verbatim, with  
37 identifiable information removed. Envisaged outcomes of the in-depth interviews will be a  
38 suitable design and content of PR acceptable respiratory health care deliverers in Sri Lanka.  
39  
40  
41  
42  
43

### 44 45 *Phase 2: Single blind randomised control feasibility trial*

46 Data will be collected by trained researchers, following standard operating procedures during  
47 participants' clinic visits. Baseline and post intervention assessments will be carried out by the  
48 blinded Medical Officers consulting at the study setting.  
49  
50  
51  
52  
53  
54  
55  
56  
57  
58  
59  
60

### *Phase 3: Qualitative evaluation of the PR intervention*

#### Focus groups with patients

Participants allocated to the intervention group will be invited to participate in focus group discussions at the end of their PR programme. Focus groups will give an insight on views, experiences, opinions and recommendations which will inform future PR programmes. We anticipate conducting up to 5 focus groups until data saturation. Each focus group discussion will be conducted with 6-8 participants in each.

Focus group discussions will be audio-recorded, expected to last approximately 45-90 minutes, and will be conducted a trained moderator and a note-taker). Focus groups will be transcribed verbatim, with identifiable information removed. Consent will be obtained from participants prior to their involvement in focus groups.

#### Interviews with PR staff

Health care personnel involved in delivering PR will be invited to participate in in-depth interviews at the end of the study to discuss aspects of feasibility and acceptability, such as insights into barriers and facilitators to attendance, logistical barriers of running a PR programme and their views of patients' experiences of the intervention. We anticipate conducting up to 15 interviews, each expected to last approximately 15-60 minutes. Interviews will be audio-recorded and will be conducted face-to-face by a trained interviewer. Interviews will be transcribed verbatim, with identifiable information removed.

#### Book of testimonies and evaluation form

Participants within PR will be asked to log their experience of PR as they progress through the programme. This will be in the form of a PR log book accessible to participants before, during and after sessions, as well as a dedicated evaluation form which will be provided as supplementary material. Staff involved in PR will also receive the same evaluation form at the end of the study.



### Sample characteristics

Basic demographics including age, sex, religion, nationality, marital status, age of leaving full-time education, education level, ethnicity, employment status, monthly income, lung health, smoking status (packs per year), biomass fuel exposure, primary respiratory diagnosis, time since diagnosis in years, secondary respiratory diagnoses, family history of lung disease, comorbidities will be recorded at baseline.

### Lung function

Spirometry (post bronchodilator Forced Expiratory Volume in the first second (FEV<sub>1</sub>), post bronchodilator Forced vital capacity (FVC), FEV<sub>1</sub>/FVC ratio, carboxyhemoglobin test<sup>19</sup>, hospitalisations within the last 12 months, number of COPD exacerbations within the last 12 months, treatments will be collected as the baseline data prior to the randomisation of participants.

### Nutritional status

Height (Holtain stadiometer), weight (calibrated weight scale) will be measured and body mass index will be calculated. Mid upper arm circumference of the participants will be measured using a measuring tape and skinfold thickness of seven sites (triceps, mid axillary, subscapular, chest, abdominal, supra iliac and thigh measurements) of the body will be measured using a validated caliper. Triplicated measurements will be taken by same investigator and mean value will be used for the calculation of body fat mass. Fat free mass will be calculated using Durnin and Womersley formula.<sup>20, 21</sup> Body composition analysis will be assessed using bioelectrical impedance (SFB7 Impedi Med dual frequency instrument, Impedi Med Limited, Australia) and software version 5.2.4.0.<sup>22</sup> Seven-day diet diary method will be used to assess the dietary history and calorie intake.

### Disease burden

Breathlessness will be measured using MRC dyspnoea grade (5-items).<sup>23</sup> The health-related quality of life related to mobility, self-care, usual activities, pain/discomfort and anxiety-depression will be measured using EQ-5D-5L (25-items),<sup>24</sup> Clinical status of the airways, functional limitations and psychosocial dysfunction will be determined using CCQ (10 -items),<sup>25</sup>

1  
2  
3 CAT (8-items) will be used to determine the severity of the COPD,<sup>26</sup> Modified brief pain  
4 inventory (3-items) will determine the commonly reported chest pain, WPAI (8-items) will be  
5 used to measure the effect of severity of COPD and general health on work productivity and  
6 regular activities<sup>27</sup> and HADS (14-items) will be used to measure the patient's emotional state  
7 and the presence or absence of clinically significant anxiety and depression.<sup>28</sup> Disease burden  
8 will be measured as baseline data prior to the randomisation and post-intervention data.  
9

### 14 Exercise capacity

15  
16 Following a safety assessment for absolute and relative contraindications for field walking  
17 tests<sup>29</sup>, maximal exercise capacity will be assessed using the incremental shuttle walking test  
18 (ISWT)<sup>30</sup> and endurance shuttle walking test (ESWT).<sup>18</sup> The ISWT and ESWT also include a  
19 pre-test and post-test measure of SpO<sub>2</sub>, blood pressure, Borg rating of breathlessness<sup>31</sup>, heart  
20 rate, Borg rate of perceived exertion.<sup>32</sup> The sit-to stand test will be completed for five continuous  
21 repetitions, to measure lower limb movement and strength.<sup>33</sup> All measures of exercise capacity  
22 will be measured at baseline prior to the randomisation and post-intervention.  
23  
24  
25  
26  
27  
28

### 29 Accelerometry-derived physical behaviours

30  
31 Participants will be asked to wear an activity monitor (ActiGraph wGT3X-BT, ActiGraph,  
32 Pensacola, FL, USA), able to detect a range of PA intensities<sup>34</sup>, on the right anterior hip during  
33 waking hours for seven days prior to attending PR (baseline) and for the seven consecutive days  
34 prior to their discharge assessment (follow-up); taking it off for water-based activities and sleep.  
35 The collection of physical activity data will coincide with a 7-day diet diary. Printed instructions  
36 will be provided to the participants regarding how to wear the monitor.  
37  
38  
39  
40  
41  
42

43 Full accelerometry methodology is provided in Table 3. Data will be processed as 60-s epoch  
44 files in ActiLife version 6.13.4 (ActiGraph, Pensacola, FL, USA). Non-wear will be defined as  
45 60-minutes of consecutive zero counts with allowance for 2-minutes of interruptions.<sup>35</sup>

46 Adherence to wearing the monitors will be assessed by examining the proportion of participants  
47 providing valid accelerometer data across a range of valid days ( $\geq 1-7$  days) and minimum wear  
48 time ( $\geq 1-12$  hours) thresholds. For reported group averages, only participants providing  $\geq 4$  valid  
49 days of  $\geq 8$  hours, for both time points will be included in the analyses.<sup>36</sup> Step count, time spent  
50 in different absolute intensity classifications of physical behaviours<sup>37</sup> and average movement  
51  
52  
53  
54  
55  
56  
57  
58  
59  
60

intensity (activity counts per minute) will be reported. Time spent in physical activity matching participants' prescribed walking exercise intensity will be derived by aligning the average walking speed during the ESWT with the activity monitor counts per minute.

**Table 3: Accelerometry data collection and processing parameters**

|                                     |                                                                                                                                                                                                                                        |
|-------------------------------------|----------------------------------------------------------------------------------------------------------------------------------------------------------------------------------------------------------------------------------------|
| Accelerometer Model                 | ActiGraph wGT3X-BT (version 6.13.4; firmware 1.9.2 )                                                                                                                                                                                   |
| Serial number range                 | Twenty unique devices will be used ranging from MOS2E09190601 to MOS2E24190146 averaging six deployments per device (same serial used for baseline and follow-up wear periods)                                                         |
| Piezosensor orientation             | Triaxial                                                                                                                                                                                                                               |
| Mode setup                          | Mode 29 (x, y, z, steps, lux)                                                                                                                                                                                                          |
| Original sample rate                | 100 Hz ( .gt3x file format)                                                                                                                                                                                                            |
| Deployment method                   | Baseline:<br>Fitted by research team on Day 0 (Baseline PR Assessment)<br>Fitted by participant on Day 1<br>Follow-up:<br>Fitted by research team Day 0 (11 <sup>th</sup> /12 <sup>th</sup> session)<br>Fitted by participant on Day 1 |
| Location worn                       | Anterior hip adjacent to the mid-line of the thigh                                                                                                                                                                                     |
| Requested days of wear              | 7 days of free-living (Day 1-7; 10,080 epochs)                                                                                                                                                                                         |
| Initialization                      | Not deployed in delay mode in order to standardised capture of Day 0 (00:00) with stop time based on date of first PR class (baseline) and data of discharge assessment (follow-up)                                                    |
| Wear instructions                   | Wear continuously except for sleep and water based activities                                                                                                                                                                          |
| Non-wear appropriation              | ≥60 min of consecutive 0s with allowance for 2 minutes of interruptions were deemed biologically implausible and coded as non-wear                                                                                                     |
| Valid day criteria                  | ≥8 hours of valid waking wear time                                                                                                                                                                                                     |
| Valid file                          | ≥4 valid days for each of the two time points                                                                                                                                                                                          |
| Missing data                        | Data modelling or imputation will not be performed                                                                                                                                                                                     |
| Epoch length                        | 60 seconds                                                                                                                                                                                                                             |
| Intensity classification (absolute) | Uniaxial (x-axis) cut-points as follows: Sedentary time <100 cpm; Light intensity 100-2019 cpm; Moderate intensity 2020-5998cpm; Vigorous intensity ≥5999cpm (Moderate-to-vigorous intensity ≥2020 cpm)                                |
| Intensity classification (relative) | Uniaxial (x-axis) cut-points based on Endurance Shuttle Walk Test performance                                                                                                                                                          |

## Costing

As part of this trial, the cost of creating a Sri-Lankan adapted PR programme will be calculated. This will include both single and recurrent costs. Single payments include the necessary costs to set up and run a programme, whilst recurrent cost refers to any item with a life expectancy of 1 year or less and typically includes disposable materials.<sup>38</sup> The fixed costs will be captured prior to the first participant enrolling into the programme and the recurrent costs will be collected at the mid-stage of recruitment. An average cost per participant will be calculated. Table 4 demonstrates the variables that will be used to calculate fixed and recurrent costs.

| Table 4: The variables used to calculate fixed and recurrent costs (not an exhaustive list)                                                                    |                                                                                                                     |
|----------------------------------------------------------------------------------------------------------------------------------------------------------------|---------------------------------------------------------------------------------------------------------------------|
| Fixed costs                                                                                                                                                    | Recurrent costs                                                                                                     |
| Venue hire                                                                                                                                                     | Venue hire                                                                                                          |
| Electrical equipment (laptop, printer, projector)                                                                                                              | Staff time to conduct PR (assessment at baseline and discharge, conduct PR classes, telephone calls and data entry) |
| Equipment for PR (weights, treadmill, cycle ergometer, country-specific equipment, step-up box, chairs)                                                        | Disposable equipment (for blood glucose monitor, spirometer mouthpieces, nose-clips, glyceryl trinitrate spray)     |
| Equipment for shuttle walking tests (cones, licences, stop watches, tape measure, electrical equipment to play audio)                                          | Servicing costs (spirometer, PR equipment, specifically treadmills and cycle ergometers)                            |
| Equipment for PR assessment (height stadiometer, weight scales, sphygmomanometer, pulse oximeter, spirometer, calibration syringe, country-specific equipment) | Miscellaneous (Oxygen cylinders, questionnaire licences, stationery (paper))                                        |
| Additional safety equipment (blood glucose monitor, Oxygen cylinder holder)                                                                                    |                                                                                                                     |
| Miscellaneous (filing cabinets, storage units, questionnaire translations, questionnaire licences, staff uniform)                                              |                                                                                                                     |

## Data management

Data collected during the study will be entered into a database using Research Electronic Data Capture (REDCap), which is a web-based platform.<sup>39</sup> Access to the database will be via a secure password protected web-interface. The participants will be identified by a study-specific identification code. Data will be validated using real-time data entry validation and electronic checks lead by the Independent Data Monitoring Committee (IDMC), established at the University of Leicester, UK.

## Quantitative data analysis

The data will be analyzed using IBM SPSS Statistics for Windows, Version 23.0. Data for baseline and follow-up time-points will be presented as descriptive statistics as appropriate. No inferential statistics will be performed due to the feasibility design of the trial.

## Qualitative data analysis

Qualitative data will be analyzed using Thematic Analysis. This approach follows six distinct stages: familiarization with data; generating initial codes; searching for themes; reviewing themes; defining and naming themes and producing the report.<sup>40</sup> The responsible investigator will carry out initial coding and a sample of focus group transcripts will be coded by a second member of the team to improve consistency and to enhance interpretive authenticity. Throughout the data analysis, the team will meet to discuss and review emerging themes and search the accounts that provide contesting views of the same phenomena. Close attention will be paid to the complexity and interactions inherent in the focus group data.<sup>41</sup>

## Adverse events

All adverse events and serious adverse events will be recorded on an adverse event log, within study trial management paperwork, case report forms and REDCap. There will be no formal interim analysis of data due to the feasibility nature of the trial. The IDMC will review high level safety data. Adverse events will be monitored at least every month, and as needed on an ad hoc basis, to ensure the continuing safety of the participants. The Scientific Committee will determine the need to terminate the trial. Participant who experience any such event will be

1  
2  
3 directed to the appropriate hospital and all the necessary care will be ensured and followed-up  
4 until the participant has resolved or stabilized.  
5  
6  
7  
8  
9

## 10 **Ethics and dissemination**

11  
12  
13 Ethical approval will be obtained from the ethics review committee of the Faculty of Medical  
14 Sciences, University of Sri Jayewardenepura and the University of Leicester, United Kingdom.  
15 Further permission for the proposed study will be obtained from the relevant authority at the  
16 Central Chest Clinic, Colombo, Sri Lanka.  
17  
18  
19

20  
21 Privacy and the confidentiality of all information and identities of participants will be strictly  
22 maintained and will not be disclosed when publishing the results of the study.  
23  
24

25  
26 A copy of the test results obtained will be provided to each participant at the end of the trial for  
27 subsequent follow-up and treatment at the clinic. Compensation for travelling will be provided to  
28 all the participants. All study documents have been translated to Sinhala and Tamil to ensure  
29 clear communication. Participation will be without compulsion and each participant has the right  
30 to withdraw at any time, without providing a reason. Consent form and data sheets will be  
31 securely stored in a separate locked cupboard. Study computers will be password protected. All  
32 the data will be stored safely up to 6 years and after 6 years consent form and data sheets will be  
33 disposed of appropriately. Study team and IDMC only will have access to final trial dataset. Data  
34 from the Global RECHARGE Core Dataset will be made available following the completion of  
35 this project and we are considering the best tools to use to make this database available to the  
36 wider community. Any modifications of the protocol will be updated on trial registry (ISRCTN)  
37 and will be informed to the ethics review committee and the participants. Participants will be  
38 provided the provisions for re-consenting after any change of the approved protocol. It will be  
39 made clear in the publication of trial findings.  
40  
41  
42  
43  
44  
45  
46  
47  
48  
49  
50  
51  
52  
53  
54  
55  
56  
57  
58  
59  
60

### Author affiliations

<sup>1</sup>Faculty of Health Sciences, KAATSU International University, Sri Lanka

<sup>2</sup>Centre for Exercise and Rehabilitation Science, NIHR Leicester Biomedical Research Centre-Respiratory, University Hospitals of Leicester NHS Trust, UK

<sup>3</sup>Department of Respiratory Sciences, University of Leicester, Leicester, UK,

<sup>4</sup>Sports Medicine Unit, Colombo South Teaching Hospital, Kalubowila, Sri Lanka

<sup>5</sup>Department of Nursing and Midwifery, Faculty of Allied Health Sciences, University of Sri Jayewardenepura, Sri Lanka

<sup>6</sup>National Hospital of Sri Lanka and Central Chest Clinic, Colombo, Sri Lanka

<sup>7</sup>Primary Care Respiratory Group, Sri Lanka

<sup>8</sup>Faculty of Health, University of Plymouth, UK

<sup>9</sup>School of Sport, Exercise and Health Sciences, Loughborough University, UK

<sup>10</sup>Department of Economics, University of Sheffield, Sheffield, UK

<sup>11</sup>Faculty of Medical Sciences, University of Sri Jayewardenepura, Sri Lanka

**Author contribution** All authors of the paper have contributed to the conception and design of the study. ARJ drafted the manuscript. All authors of the paper have revised the content and approved the final version to be published. All authors are accountable for all aspects of the work.

**Funding** This research was funded by the National Institute for Health Research (NIHR) (17/63/20) using UK aid from the UK Government to support global health research. The views expressed in this publication are those of the author(s) and not necessarily those of the NIHR or the UK Department of Health and Social Care.

**Competing interests** None declared.



## References

1. Singh D, Agusti A, Anzueto A, Barnes PJ, Bourbeau J, Celli BR, et al. Global Strategy for the Diagnosis, Management, and Prevention of Chronic Obstructive Lung Disease: the GOLD science committee report 2019. *Eur Respir J*. 2019;53(5).
2. Alwan A. Global Status Report on Non-Communicable Diseases. WHO, 2010
3. World Health Organization. Global surveillance, prevention and control of Chronic Respiratory Diseases, Switzerland, 2007; 22-23.
4. Amarasiri L, Fernando A, Gunasekara K, Gunasinghe W, Madegedara D, Wickramasinghe R. The prevalence of Chronic Obstructive Pulmonary Disease in Sri Lanka. *European Respiratory Journal*, 2017; 2017(50):1212.
5. World Health Organization. WHO strategy for prevention and control of chronic respiratory diseases, Geneva, 2017.
6. Yasaratne D, Dharmage SC. Letter from Sri Lanka. *Respirology*. 2020;25:339-41.
7. Pinnock H, Kendall M, Murray SA, Worth A, Levack P, Porter M, et al. Living and dying with severe chronic obstructive pulmonary disease: Multi-perspective longitudinal qualitative study. *BMJ*. 2011;342:268.
8. Singh SJ, Halpin DMG, Salvi S, Kirenga BJ, Mortimer K. Comment Exercise and pulmonary rehabilitation for people with chronic lung disease in LMICs : challenges and opportunities. *Lancet Respir [Internet]*. 2019;7(12):1002-4.
9. Nici L, Donner C, Wouters E, Zuwallack R, Ambrosino N, Bourbeau J, et al. American Thoracic Society Documents American Thoracic Society / European Respiratory Society Statement on Pulmonary Rehabilitation. *Am J Respir Crit Care Med*. 2006;173(May):1390-413.
10. McCarthy B, Casey D, Devane D, Murphy K, Murphy E, Lacasse Y, et al. Pulmonary rehabilitation for chronic obstructive pulmonary disease (Review). *Cochrane Database Syst Rev*. 2015;2015(2).
11. Jones AW, Taylor A, Gowler H, Kelly NO, Ghosh S, Bridle C. Systematic review of interventions to improve patient uptake and completion of pulmonary rehabilitation in COPD. *ERJ Open Res*. 2017;3.



12. Chan AW, Tetzlaff JM, Altman DG, Laupacis A, Gøtzsche PC, Krleža-Jerić K, et al. Spirit 2013 statement: Defining standard protocol items for clinical trials. *Chinese J Evidence-Based Med.* 2013;13(12):1501–7.
13. Bolton CE, Bevan-Smith EF, Blakey JD, et al. British Thoracic Society guideline on pulmonary rehabilitation in adults: accredited by NICE. *Thorax.* 2013;68:ii1-ii30.
14. Ries AL, Bauldoff GS, Casaburi R, Mahler DA, Rochester CL, Herrerias C. Pulmonary Rehabilitation; Joint ACCP/AACVPR Evidence-Based Clinical Practice Guidelines. *Chest.* 2007;131(5):4S-42S.
15. Blackstock FC, Evans RA. Rehabilitation in lung diseases: ‘Education’ component of pulmonary rehabilitation. *Respirology.* 2019;24(9):863–70
16. Spencer LM, McKeough ZJ. Maintaining the benefits following pulmonary rehabilitation: Achievable or not? *Respirology.* 2019;24(9):909–15.
17. Armstrong M, Vogiatzis I. Personalized exercise training in chronic lung diseases. *Respirology.* 2019;24(9):854–62.
18. Revill SM, Morgan MDL, Singh SJ, Williams J, Hardman AE. The endurance shuttle walk : a new field test for the assessment of endurance capacity in chronic obstructive pulmonary disease. *Thorax.* 1999;54(2):213–22
19. Yasuda H, Yamaya M, Nakayama K, Ebihara S, Sasaki T, Okinaga S, et al. Increased Arterial Carboxyhemoglobin Concentrations in Chronic Obstructive Pulmonary Disease. *Am J Respir Crit Care Med.* 2005;171:1246–51.
20. Durnin JVGA, Womersley J. Body fat assessed from total body density and its estimation from skinfold thickness: measurements on 481 men and women aged from 16 to 72 Years. *Br J Nutr.* 1974;32:77–96.
21. Doña E, Oliveira C, Palenque FJ, Porras N, Dorado A, Martín-valero R, et al. Body Composition Measurement in Bronchiectasis: Comparison between Bioelectrical Impedance Analysis, Skinfold Thickness Measurement, and Dual-Energy X-ray Absorptiometry before and after Pulmonary Rehabilitation. *J Acad Nutr Diet.* 2018;118(8):1464–73.
22. Lanerolle MD, Lanerolle P, Atukorala S, Silva A De. Enhancing the accuracy of bio impedance analysis in assessing total body water. *Int J Body Compos Res.* 2012;10(1):29–34.
23. Bestall JC, Paul EA, Garrod R, Garnham R, Jones PW, Wedzicha JA. Usefulness of the Medical Research Council (MRC) dyspnoea scale as a measure of disability in patients with

- 1  
2  
3 chronic obstructive pulmonary disease. *Thorax*. 1999;54:581–6.  
4  
5 24. Herdman M, Gudex C, Lloyd A, Janssen M, Kind P, Parkin D, et al. Development and  
6 preliminary testing of the new five-level version of EQ-5D (EQ-5D5L). *Quality of Life*  
7 *Research*. 2011;20(10): 1727-736.  
8  
9  
10 25. Van der Molen T, Willemse BW, Schokker S, et al. Development, validity and  
11 responsiveness of the Clinical COPD Questionnaire. *Health Qual Life Outcomes*. 2003;1:13.  
12  
13 26. Papaioannou M, Pitsiou G, Manika K, Kontou P, Zarogoulidis P, Sichletidis L, Kioumis IP.  
14 COPD assessment test: A simple tool to evaluate disease severity and response to treatment.  
15 *J of Chronic Obstructive Pulmonary Disease*. 2014;11:489- 95.  
16  
17 27. Reilly MC, Zbrozek IAS, Dukes EM. The Validity and Reproducibility of a Work  
18 Productivity and Activity Impairment Instrument. *Pharmacoeconomics*. 1993;4(5):353–65.  
19  
20 28. Zigmond AS, Snaith RP. The hospital anxiety and depression scale. *Acta Psychiatrica*  
21 *Scandinavica*. 1983;67(6):361-70.  
22  
23 29. Weisman IM, Marciniuk D, Martinez FJ, Sciurba F, Sue D, Myers J, et al. American  
24 Thoracic Society / American College of Chest Physicians ATS / ACCP Statement on  
25 Cardiopulmonary Exercise Testing. *Am J Respir Crit Care Med*. 2003;167:211–77.  
26  
27 30. Singh SJ, Morgan MD, Scott S, Walters D, Hardman AE. Development of a shuttle walking  
28 test of disability in patients with chronic airways obstruction. *Thorax*. 1992;47(12):1019-24.  
29  
30 31. Mahler DA, Horowitz MB. Perception of breathlessness during exercise in patients with  
31 respiratory disease. *Med Sci Sports Exerc*. 1994;26:1078–1081.  
32  
33 32. Borg GA. Psychophysical bases of perceived exertion. *Med Sci Sports Exerc*. 1982;14:377–  
34 381  
35  
36 33. Jones SE, Kon SSC, Canavan JL, Patel MS, Clark AL, Nolan CM, et al. The five-repetition  
37 sit-to-stand test as a functional outcome measure in COPD. *Thorax*. 2013;68:1015–20.  
38  
39 34. Bassett DR, John D. Use of pedometers and accelerometers in clinical populations: validity  
40 and reliability issues. *Phys Ther Rev*. 2010;15:135–42.  
41  
42 35. Choi L, Liu Z, Matthews CE, Buchowski MS. Validation of accelerometer wear and nonwear  
43 time classification algorithm. *Med Sci Sports Exerc*. 2011;43:357–64.  
44  
45 36. Demeyer H, Burtin C, Van Remoortel H, Hornikx M, Langer D, Decramer M, et al.  
46 Standardizing the analysis of physical activity in patients with COPD following a pulmonary  
47 rehabilitation program. *Chest* 2014 Aug;146(2):318-327  
48  
49  
50  
51  
52  
53  
54  
55  
56  
57  
58  
59  
60

- 1  
2  
3 37. Troiano RP, Berrigan D, Dodd KW, Mâsse LC, Tilert T, McDowell M. Physical activity in  
4 the United States measured by accelerometer. *Med Sci Sports Exerc* 2008 Jan;40(1):181-188.  
5  
6 38. Lucas AO, Gilles HM. Approaches to economic evaluation. *Short Textbook of Public Health*  
7 *Medicine for the Tropics*. 2002. CRC Press.  
8  
9 39. Harris PA, Taylor R, Minor BL, Elliott V, Fernandez M, Neal LO, et al. The REDCap  
10 consortium: Building an international community of software platform partners. *J Biomed*  
11 *Inform*. 2019;95.  
12  
13 40. Braun V, Clarke V. Using thematic analysis in psychology. *Qual Res Psychol*. 2006;3:77–101  
14  
15 41. Maguire M, Delahunt B. Doing a Thematic Analysis : A Practical, Step-by-Step Guide for  
16  
17 Learning and Teaching Scholars. *AISHE-J*. 2017;8(3):3351–14.  
18  
19  
20  
21  
22  
23  
24  
25  
26  
27  
28  
29  
30  
31  
32  
33  
34  
35  
36  
37  
38  
39  
40  
41  
42  
43  
44  
45  
46  
47  
48  
49  
50  
51  
52  
53  
54  
55  
56  
57  
58  
59  
60

**Table 1: Primary outcome measures- Feasibility and operational experience assessment**

| <b>Feasibility of patient recruitment</b>                                                                                                                                                                                                    | <b>Data sources</b>                                                                                     |
|----------------------------------------------------------------------------------------------------------------------------------------------------------------------------------------------------------------------------------------------|---------------------------------------------------------------------------------------------------------|
| Feasibility of screening and recruiting participants                                                                                                                                                                                         | Interviews with the healthcare professionals, screening log                                             |
| Suitability of the inclusion criteria                                                                                                                                                                                                        | Interviews with the healthcare professionals, screening log                                             |
| Number of eligible patients, number of patients screened, number of patients invited to take part, actual number of participants who consent to take part                                                                                    | Screening log                                                                                           |
| Number of patients who refuse, drop out and the reasons for refuse and drop out                                                                                                                                                              | Interviews with the patients, screening log                                                             |
| <b>Operational experience of intervention delivery</b>                                                                                                                                                                                       |                                                                                                         |
| Service provider and multi-disciplinary teams' willingness and ability to deliver the PR                                                                                                                                                     | Interviews with healthcare professionals                                                                |
| The practicality of delivering the intervention in the proposed setting                                                                                                                                                                      | Interviews with healthcare professionals and focus groups with participants                             |
| The time needed to collect the data<br>Baseline visit- Time taken for each measure (each individual questionnaire and physical measure)<br>Follow-up visit- Time taken for each measure (each individual questionnaire and physical measure) | Interviews with the healthcare professionals, Rehabilitation records                                    |
| Data completeness and accuracy                                                                                                                                                                                                               | Interviews with the healthcare professionals, Rehabilitation records, RedCap                            |
| Adherence to home exercise                                                                                                                                                                                                                   | Interviews with the patients and self-report exercise diary                                             |
| The training and resources needed to deliver the intervention (ensuring readiness for a future much larger multi-center trial)                                                                                                               | Interviews with the healthcare professionals and focus groups with participants, Rehabilitation records |
| Description of unintended events                                                                                                                                                                                                             | Adverse events log, REDCap                                                                              |

**Table 2: Secondary outcome measures**

| <b>Outcome measures</b>                                                                                                 | <b>Baseline</b> | <b>Post-intervention</b> |
|-------------------------------------------------------------------------------------------------------------------------|-----------------|--------------------------|
| Socio-demographics                                                                                                      | x               |                          |
| Lung health (spirometry data, smoking status, number of COPD exacerbations in the last year)                            | x               |                          |
| Comorbidities                                                                                                           | x               |                          |
| Treatments                                                                                                              | x               |                          |
| Nutritional status (Body Mass Index, mid upper arm circumference, skinfold thickness, self-report seven-day diet diary) | x               | x                        |
| Disease burden (MRC dyspnea grade, CAT, CCQ)                                                                            | x               | x                        |
| Economic impact of disease (WPAI)                                                                                       | x               | x                        |
| Quality of life (EQ-5D-5L)                                                                                              | x               | x                        |
| Psychological wellbeing (Hospital Anxiety and Depression scale)                                                         | x               | x                        |
| Physical function (5x sit-to-stand test)                                                                                | x               | x                        |
| Exercise capacity (ISWT, ESWT)                                                                                          | x               | x                        |
| Accelerometer assessed physical activity (ActiGraph wGT3x-BT)                                                           | x               | x                        |

**Table 3: Accelerometry data collection and processing parameters**

|                                     |                                                                                                                                                                                                                                        |
|-------------------------------------|----------------------------------------------------------------------------------------------------------------------------------------------------------------------------------------------------------------------------------------|
| Accelerometer Model                 | ActiGraph wGT3X-BT (version 6.13.4; firmware 1.9.2 )                                                                                                                                                                                   |
| Serial number range                 | Twenty unique devices will be used ranging from MOS2E09190601 to MOS2E24190146 averaging six deployments per device (same serial used for baseline and follow-up wear periods)                                                         |
| Piezosensor orientation             | Triaxial                                                                                                                                                                                                                               |
| Mode setup                          | Mode 29 (x, y, z, steps, lux)                                                                                                                                                                                                          |
| Original sample rate                | 100 Hz (.gt3x file format)                                                                                                                                                                                                             |
| Deployment method                   | Baseline:<br>Fitted by research team on Day 0 (Baseline PR Assessment)<br>Fitted by participant on Day 1<br>Follow-up:<br>Fitted by research team Day 0 (11 <sup>th</sup> /12 <sup>th</sup> session)<br>Fitted by participant on Day 1 |
| Location worn                       | Anterior hip adjacent to the mid-line of the thigh                                                                                                                                                                                     |
| Requested days of wear              | 7 days of free-living (Day 1-7; 10,080 epochs)                                                                                                                                                                                         |
| Initialization                      | Not deployed in delay mode in order to standardised capture of Day 0 (00:00) with stop time based on date of first PR class (baseline) and data of discharge assessment (follow-up)                                                    |
| Wear instructions                   | Wear continuously except for sleep and water based activities                                                                                                                                                                          |
| Non-wear appropriation              | $\geq 60$ min of consecutive 0s with allowance for 2 minutes of interruptions were deemed biologically implausible and coded as non-wear                                                                                               |
| Valid day criteria                  | $\geq 8$ hours of valid waking wear time                                                                                                                                                                                               |
| Valid file                          | $\geq 4$ valid days for each of the two time points                                                                                                                                                                                    |
| Missing data                        | Data modelling or imputation will not be performed                                                                                                                                                                                     |
| Epoch length                        | 60 seconds                                                                                                                                                                                                                             |
| Intensity classification (absolute) | Uniaxial (x-axis) cut-points as follows: Sedentary time $< 100$ cpm; Light intensity 100-2019 cpm; Moderate intensity 2020-5998cpm; Vigorous intensity $\geq 5999$ cpm (Moderate-to-vigorous intensity $\geq 2020$ cpm)                |
| Intensity classification (relative) | Uniaxial (x-axis) cut-points based on Endurance Shuttle Walk Test performance                                                                                                                                                          |

**Table 4: The variables used to calculate fixed and recurrent costs (not an exhaustive list)**

| <b>Fixed costs</b>                                                                                                                                             | <b>Recurrent costs</b>                                                                                              |
|----------------------------------------------------------------------------------------------------------------------------------------------------------------|---------------------------------------------------------------------------------------------------------------------|
| Venue hire                                                                                                                                                     | Venue hire                                                                                                          |
| Electrical equipment (laptop, printer, projector)                                                                                                              | Staff time to conduct PR (assessment at baseline and discharge, conduct PR classes, telephone calls and data entry) |
| Equipment for PR (weights, treadmill, cycle ergometer, country-specific equipment, step-up box, chairs)                                                        | Disposable equipment (for blood glucose monitor, spirometer mouthpieces, nose-clips, glyceryl trinitrate spray)     |
| Equipment for shuttle walking tests (cones, licences, stop watches, tape measure, electrical equipment to play audio)                                          | Servicing costs (spirometer, PR equipment, specifically treadmills and cycle ergometers)                            |
| Equipment for PR assessment (height stadiometer, weight scales, sphygmomanometer, pulse oximeter, spirometer, calibration syringe, country-specific equipment) | Miscellaneous (Oxygen cylinders, questionnaire licences, stationery (paper))                                        |
| Additional safety equipment (blood glucose monitor, Oxygen cylinder holder)                                                                                    |                                                                                                                     |
| Miscellaneous (filing cabinets, storage units, questionnaire translations, questionnaire licences, staff uniform)                                              |                                                                                                                     |

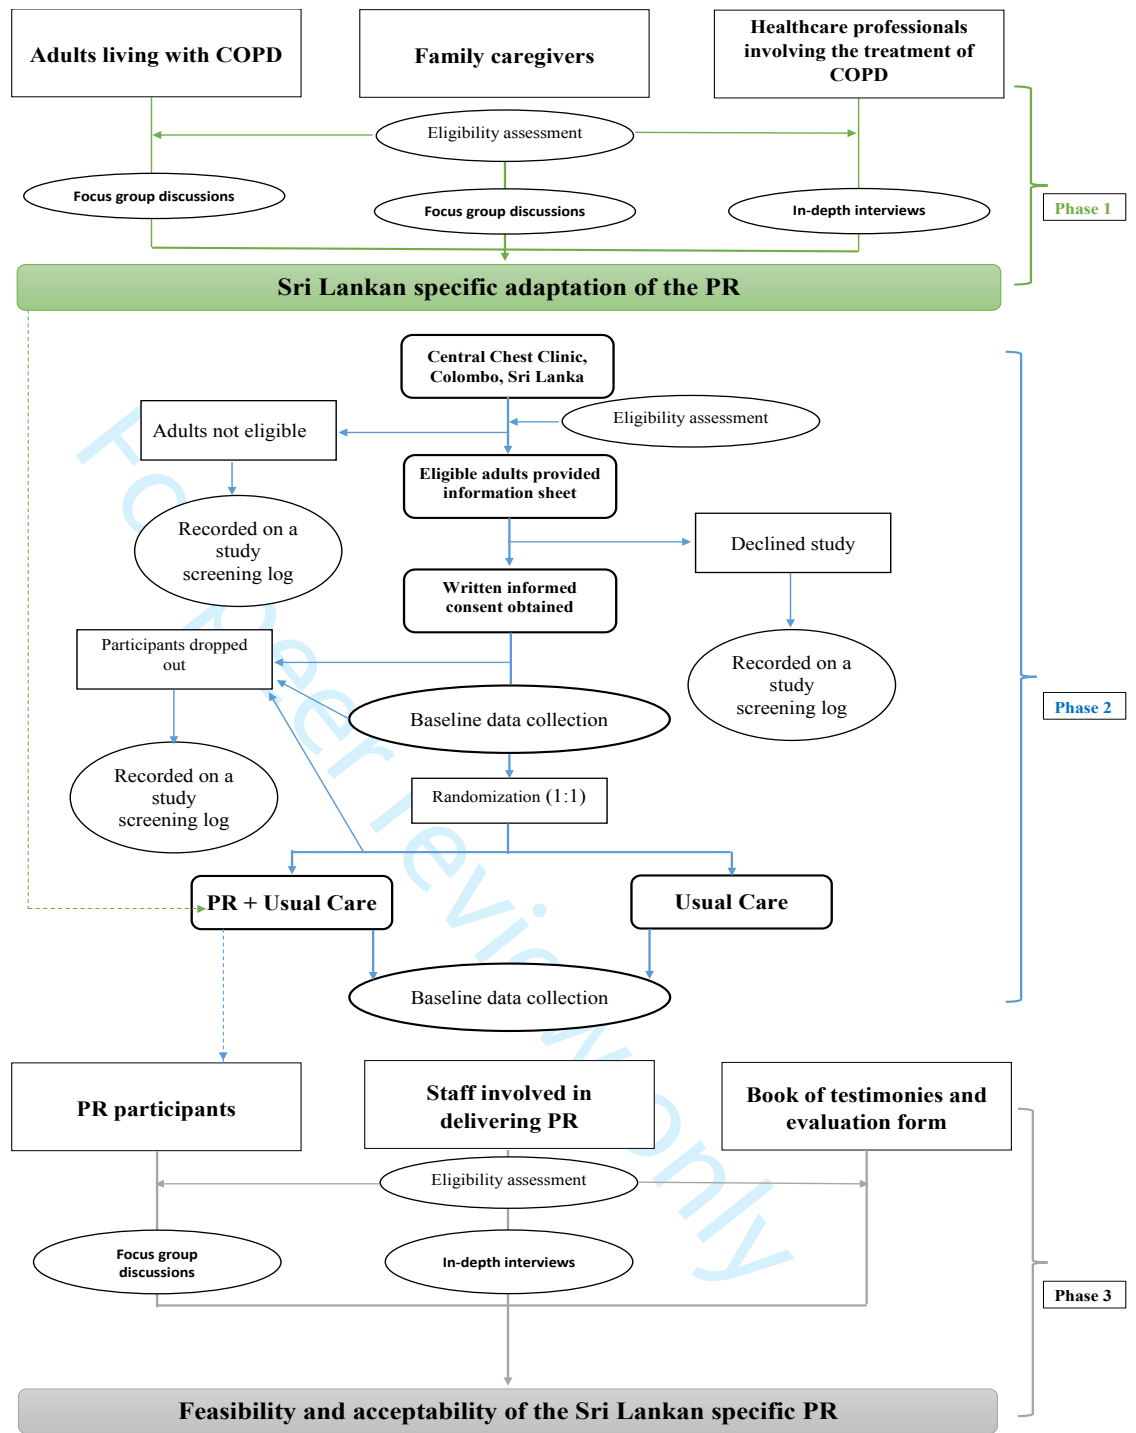

Figure 1: Flow of participant of the three phases of the study



## Appendices

### Information sheet

#### **Cultural adaptation of Pulmonary Rehabilitation and subsequent testing in a Randomised Controlled Feasibility Trial for Adults with Chronic Obstructive Pulmonary Disease in Sri Lanka**

I am Prof. S. W. Wimalasekera, of Department of Physiology, Faculty of Medical Sciences, University of Sri Jayewardenepura. I and my team of health care personnel are, conducting a research on “Testing the Feasibility and Acceptability of a Culturally Appropriate Hospital-Based Pulmonary Rehabilitation (PR) Programme for Adults with Chronic Obstructive Pulmonary Disease in Sri Lanka”. I invite you to participate in the study. Please take time and read the following information carefully before giving your consent. You are free to ask questions to clarify facts which are not clear or ask for more information if you need.

#### **Purpose of the study**

The purpose of this study is to devise an appropriate PR programme and then determine the feasibility and acceptability of this programme for adults living with COPD in Sri Lanka and assess the potential for a future trial of its effectiveness.

#### **When you participate you will be required to do the following**

You will be requested to participate several components of the study.

You will participate in a group discussion conducted in a quiet room in the clinic (conference hall) with very minimal disturbances. At the beginning of the discussion you will answer some questions regards your personal information, (age, gender, history of the disease condition). Then the interviewer will ask some questions regarding your thoughts and ideas about pulmonary rehabilitation. You and your group members can freely comment on the questions or can add your ideas to the discussion. The interview takes around forty-five minutes of time.

You will also participate in a feasibility trial which you will be allocated to one of the two groups. One group will receive usual care and PR and the other group will receive only usual care which consists of pharmacological treatment and brief information about disease condition, medication and inhaler techniques. PR is typically a 6-week rolling programme and consisting of 12 sessions in total, delivered twice a week. Sessions usually last approximately two hours, with one hour for exercise training and one hour for education. Some routine and specific test and measurements will be taken before and after the intervention will describe any changes in the health of the adults living with COPD.

If you are allocated to the group who receive the PR, you will be asked to share your experiences regarding the PR and subjected modification and opinions on pulmonary rehabilitation.

In order to maintain accuracy, and to keep records, your discussion will be recorded by the research team members with your permission. Your participation in the project will remain confidential and the provision of your name and address is necessary for us to maintain records. Any personal information gathered during the study will not be disclosed to a third party. Your responses to the questions and will

1  
2  
3 only be used for the purpose of this project. You can be assured that you will remain anonymous if you  
4 take part in the project. Your participation in this project is entirely voluntary. You are not obliged to take  
5 part. If you do not wish to take part, you can withdraw without giving a reason and your medical care will  
6 not be affected, further you will not be contacted again. Similarly, if you do agree to participate, you are  
7 free to withdraw at any time during the project.  
8  
9  
10

### 11 **What are the possible benefits of taking part?**

12  
13 By participating in the study, you will contribute to develop a PR programme which helps to improve the  
14 quality of life of the adults living with COPD. As well as you will contribute to determine the feasibility  
15 and acceptability of this programme within the health care system in Sri Lanka.  
16  
17  
18

### 19 **What are the possible disadvantages and risks of taking part?**

20  
21 You will be undertaking some physical tests as part of the research. Therefore, there may be a very small  
22 risk of falls, breathlessness, changes in blood pressure and changes in heart rate. However, these risks are  
23 very rare, and trained staff and emergency equipment will be available to deal with any serious events.  
24 Participants who experience any such event will be directed to the appropriate hospital and all the  
25 necessary care will be ensured and followed-up until the participant has resolved or stabilized.  
26  
27  
28

### 29 **What will happen if you don't carry on with the study?**

30  
31 If you withdraw from the study all the information and data collected from you, to date, will be destroyed  
32 and your name would be removed from all the research study files. There will not be any loss or impact  
33 on your routine medical care which you are entitled to.  
34  
35  
36

### 37 **What will happen to the results of the research study?**

38  
39 The results of all the participants of the study will be used for scientific research. All data will be  
40 available only to the researchers and information provided will be strictly confidential. Your participation  
41 in the study is highly appreciated. Privacy and confidentiality of data gathered is completely secure and  
42 will be used only for research purposes. If you have any questions or any concerns with regards to the  
43 study and need further information you can call the telephone number listed below. Further you can send  
44 any complaint to the above postal address or email address.  
45  
46  
47

48 Yours faithfully

49 Prof. S.W. Wimalasekera

50 Department of Physiology, Faculty of Medical Sciences, University of Sri Jayewardenepura

51 T.P No. 0777487203 e-mail : [savithriww@yahoo.com](mailto:savithriww@yahoo.com)

52 Ethics Review Committee – University of Sri Jayewardenepura - +94 11 2758000 Ext 4075e  
53  
54  
55  
56  
57  
58  
59  
60

1  
2  
3 **Consent Form: Randomised Controlled Feasibility Trial**  
4

5 **Cultural adaptation of Pulmonary Rehabilitation and subsequent testing in a Randomised**  
6 **Controlled Feasibility Trial for Adults with Chronic Obstructive Pulmonary Disease in Sri Lanka**  
7

- 8 1. Have you read the information sheet? (please keep a copy for yourself) YES/NO  
9  
10 2. Have you had an opportunity to discuss this and ask any questions? YES/NO  
11  
12 3. Have you had satisfactory answers to all your questions? YES/NO  
13  
14 4. Have you received enough information about the study? YES/NO  
15  
16 5. Who explained the study to you-----  
17  
18 6. Do you understand that you are free to withdraw from the study at any time,  
19 without having to give a reason YES/NO  
20  
21 7. All personal details will be treated as STRICTLY CONFIDENTIAL.  
22 Do you give your permission for these individuals to have access to the records? YES/NO  
23  
24 8. Have you had sufficient time to come to your decision? YES/NO  
25  
26 9. Do you agree to take part in this study? YES/NO

27 Participant's signature ----- Date-----  
28  
29  
30

31 **By the Witness**  
32

33 I have been present while the procedure was explained to the participant and I have witness his/ her  
34 willingness to take part in the study.  
35

36 Signature of witness----- Date-----  
37

38 (The witness should be a person not connected to the study)  
39

40 Name -----  
41

42 Contact details-----  
43  
44  
45  
46  
47  
48  
49  
50  
51  
52  
53  
54  
55  
56  
57  
58  
59  
60

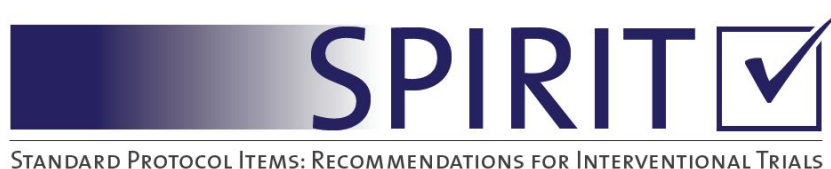

SPIRIT 2013 Checklist: Recommended items to address in a clinical trial protocol and related documents\*

| Section/item                      | Item No | Description                                                                                                                                                                                                                                                                              | Page(s) |
|-----------------------------------|---------|------------------------------------------------------------------------------------------------------------------------------------------------------------------------------------------------------------------------------------------------------------------------------------------|---------|
| <b>Administrative information</b> |         |                                                                                                                                                                                                                                                                                          |         |
| Title                             | 1       | Descriptive title identifying the study design, population, interventions, and, if applicable, trial acronym                                                                                                                                                                             | 01      |
| Trial registration                | 2a      | Trial identifier and registry name. If not yet registered, name of intended registry                                                                                                                                                                                                     | 02      |
|                                   | 2b      | All items from the World Health Organization Trial Registration Data Set                                                                                                                                                                                                                 | 01 - 19 |
| Protocol version                  | 3       | Date and version identifier                                                                                                                                                                                                                                                              | NA      |
| Funding                           | 4       | Sources and types of financial, material, and other support                                                                                                                                                                                                                              | 19      |
| Roles and responsibilities        | 5a      | Names, affiliations, and roles of protocol contributors                                                                                                                                                                                                                                  | 01,18   |
|                                   | 5b      | Name and contact information for the trial sponsor                                                                                                                                                                                                                                       | 19      |
|                                   | 5c      | Role of study sponsor and funders, if any, in study design; collection, management, analysis, and interpretation of data; writing of the report; and the decision to submit the report for publication, including whether they will have ultimate authority over any of these activities | 19      |
|                                   | 5d      | Composition, roles, and responsibilities of the coordinating centre, steering committee, endpoint adjudication committee, data management team, and other individuals or groups overseeing the trial, if applicable (see Item 21a for data monitoring committee)                         | 17      |
| <b>Introduction</b>               |         |                                                                                                                                                                                                                                                                                          |         |
| Background and rationale          | 6a      | Description of research question and justification for undertaking the trial, including summary of relevant studies (published and unpublished) examining benefits and harms for each intervention                                                                                       | 03      |
|                                   | 6b      | Explanation for choice of comparators                                                                                                                                                                                                                                                    | NA      |
| Objectives                        | 7       | Specific objectives or hypotheses                                                                                                                                                                                                                                                        | 04      |
| Trial design                      | 8       | Description of trial design including type of trial (eg, parallel group, crossover, factorial, single group), allocation ratio, and framework (eg, superiority, equivalence, noninferiority, exploratory)                                                                                | 04      |

**Methods: Participants, interventions, and outcomes**

|                      |     |                                                                                                                                                                                                                                                                                                                                                                                |         |
|----------------------|-----|--------------------------------------------------------------------------------------------------------------------------------------------------------------------------------------------------------------------------------------------------------------------------------------------------------------------------------------------------------------------------------|---------|
| Study setting        | 9   | Description of study settings (eg, community clinic, academic hospital) and list of countries where data will be collected. Reference to where list of study sites can be obtained                                                                                                                                                                                             | 05      |
| Eligibility criteria | 10  | Inclusion and exclusion criteria for participants. If applicable, eligibility criteria for study centres and individuals who will perform the interventions (eg, surgeons, psychotherapists)                                                                                                                                                                                   | 05      |
| Interventions        | 11a | Interventions for each group with sufficient detail to allow replication, including how and when they will be administered                                                                                                                                                                                                                                                     | 07      |
|                      | 11b | Criteria for discontinuing or modifying allocated interventions for a given trial participant (eg, drug dose change in response to harms, participant request, or improving/worsening disease)                                                                                                                                                                                 | 17.18   |
|                      | 11c | Strategies to improve adherence to intervention protocols, and any procedures for monitoring adherence (eg, drug tablet return, laboratory tests)                                                                                                                                                                                                                              | 09, 18  |
|                      | 11d | Relevant concomitant care and interventions that are permitted or prohibited during the trial                                                                                                                                                                                                                                                                                  | 18      |
| Outcomes             | 12  | Primary, secondary, and other outcomes, including the specific measurement variable (eg, systolic blood pressure), analysis metric (eg, change from baseline, final value, time to event), method of aggregation (eg, median, proportion), and time point for each outcome. Explanation of the clinical relevance of chosen efficacy and harm outcomes is strongly recommended | 08 - 10 |
| Participant timeline | 13  | Time schedule of enrolment, interventions (including any run-ins and washouts), assessments, and visits for participants. A schematic diagram is highly recommended (see Figure)                                                                                                                                                                                               | 06      |
| Sample size          | 14  | Estimated number of participants needed to achieve study objectives and how it was determined, including clinical and statistical assumptions supporting any sample size calculations                                                                                                                                                                                          | 10      |
| Recruitment          | 15  | Strategies for achieving adequate participant enrolment to reach target sample size                                                                                                                                                                                                                                                                                            | 07      |

**Methods: Assignment of interventions (for controlled trials)**

## Allocation:

|                     |     |                                                                                                                                                                                                                                                                                                                                                          |    |
|---------------------|-----|----------------------------------------------------------------------------------------------------------------------------------------------------------------------------------------------------------------------------------------------------------------------------------------------------------------------------------------------------------|----|
| Sequence generation | 16a | Method of generating the allocation sequence (eg, computer-generated random numbers), and list of any factors for stratification. To reduce predictability of a random sequence, details of any planned restriction (eg, blocking) should be provided in a separate document that is unavailable to those who enrol participants or assign interventions | 10 |
|---------------------|-----|----------------------------------------------------------------------------------------------------------------------------------------------------------------------------------------------------------------------------------------------------------------------------------------------------------------------------------------------------------|----|

|    |                |     |                                                                         |        |
|----|----------------|-----|-------------------------------------------------------------------------|--------|
| 1  |                |     |                                                                         |        |
| 2  | Allocation     | 16b | Mechanism of implementing the allocation sequence (eg, central          | 10     |
| 3  | concealment    |     | telephone; sequentially numbered, opaque, sealed envelopes),            |        |
| 4  | mechanism      |     | describing any steps to conceal the sequence until interventions are    |        |
| 5  |                |     | assigned                                                                |        |
| 6  |                |     |                                                                         |        |
| 7  | Implementation | 16c | Who will generate the allocation sequence, who will enrol participants, | 10     |
| 8  |                |     | and who will assign participants to interventions                       |        |
| 9  |                |     |                                                                         |        |
| 10 | Blinding       | 17a | Who will be blinded after assignment to interventions (eg, trial        | 10, 11 |
| 11 | (masking)      |     | participants, care providers, outcome assessors, data analysts), and    |        |
| 12 |                |     | how                                                                     |        |
| 13 |                | 17b | If blinded, circumstances under which unblinding is permissible, and    | NA     |
| 14 |                |     | procedure for revealing a participant's allocated intervention during   |        |
| 15 |                |     | the trial                                                               |        |
| 16 |                |     |                                                                         |        |
| 17 |                |     |                                                                         |        |
| 18 |                |     |                                                                         |        |
| 19 |                |     |                                                                         |        |

### Methods: Data collection, management, and analysis

|    |                 |     |                                                                          |         |
|----|-----------------|-----|--------------------------------------------------------------------------|---------|
| 20 |                 |     |                                                                          |         |
| 21 |                 |     |                                                                          |         |
| 22 | Data collection | 18a | Plans for assessment and collection of outcome, baseline, and other      | 11 - 15 |
| 23 | methods         |     | trial data, including any related processes to promote data quality (eg, |         |
| 24 |                 |     | duplicate measurements, training of assessors) and a description of      |         |
| 25 |                 |     | study instruments (eg, questionnaires, laboratory tests) along with      |         |
| 26 |                 |     | their reliability and validity, if known. Reference to where data        |         |
| 27 |                 |     | collection forms can be found, if not in the protocol                    |         |
| 28 |                 | 18b | Plans to promote participant retention and complete follow-up,           | 07      |
| 29 |                 |     | including list of any outcome data to be collected for participants who  |         |
| 30 |                 |     | discontinue or deviate from intervention protocols                       |         |
| 31 |                 |     |                                                                          |         |
| 32 |                 |     |                                                                          |         |
| 33 |                 |     |                                                                          |         |
| 34 | Data            | 19  | Plans for data entry, coding, security, and storage, including any       | 17      |
| 35 | management      |     | related processes to promote data quality (eg, double data entry;        |         |
| 36 |                 |     | range checks for data values). Reference to where details of data        |         |
| 37 |                 |     | management procedures can be found, if not in the protocol               |         |
| 38 |                 |     |                                                                          |         |
| 39 |                 |     |                                                                          |         |
| 40 | Statistical     | 20a | Statistical methods for analysing primary and secondary outcomes.        | 17      |
| 41 | methods         |     | Reference to where other details of the statistical analysis plan can be |         |
| 42 |                 |     | found, if not in the protocol                                            |         |
| 43 |                 | 20b | Methods for any additional analyses (eg, subgroup and adjusted           | 17      |
| 44 |                 |     | analyses)                                                                |         |
| 45 |                 | 20c | Definition of analysis population relating to protocol non-adherence     | 17      |
| 46 |                 |     | (eg, as randomised analysis), and any statistical methods to handle      |         |
| 47 |                 |     | missing data (eg, multiple imputation)                                   |         |
| 48 |                 |     |                                                                          |         |
| 49 |                 |     |                                                                          |         |
| 50 |                 |     |                                                                          |         |
| 51 |                 |     |                                                                          |         |

### Methods: Monitoring

|    |                 |     |                                                                      |    |
|----|-----------------|-----|----------------------------------------------------------------------|----|
| 52 |                 |     |                                                                      |    |
| 53 |                 |     |                                                                      |    |
| 54 | Data monitoring | 21a | Composition of data monitoring committee (DMC); summary of its role  | 17 |
| 55 |                 |     | and reporting structure; statement of whether it is independent from |    |
| 56 |                 |     | the sponsor and competing interests; and reference to where further  |    |
| 57 |                 |     | details about its charter can be found, if not in the protocol.      |    |
| 58 |                 |     | Alternatively, an explanation of why a DMC is not needed             |    |
| 59 |                 |     |                                                                      |    |
| 60 |                 |     |                                                                      |    |

|    |                                 |     |                                                                               |       |
|----|---------------------------------|-----|-------------------------------------------------------------------------------|-------|
| 1  |                                 |     |                                                                               |       |
| 2  |                                 | 21b | Description of any interim analyses and stopping guidelines, including        | 17    |
| 3  |                                 |     | who will have access to these interim results and make the final              |       |
| 4  |                                 |     | decision to terminate the trial                                               |       |
| 5  |                                 |     |                                                                               |       |
| 6  | Harms                           | 22  | Plans for collecting, assessing, reporting, and managing solicited and        | 17    |
| 7  |                                 |     | spontaneously reported adverse events and other unintended effects            |       |
| 8  |                                 |     | of trial interventions or trial conduct                                       |       |
| 9  |                                 |     |                                                                               |       |
| 10 |                                 |     |                                                                               |       |
| 11 | Auditing                        | 23  | Frequency and procedures for auditing trial conduct, if any, and              | 17    |
| 12 |                                 |     | whether the process will be independent from investigators and the            |       |
| 13 |                                 |     | sponsor                                                                       |       |
| 14 |                                 |     |                                                                               |       |
| 15 |                                 |     |                                                                               |       |
| 16 | <b>Ethics and dissemination</b> |     |                                                                               |       |
| 17 | Research ethics                 | 24  | Plans for seeking research ethics committee/institutional review board        | 18    |
| 18 | approval                        |     | (REC/IRB) approval                                                            |       |
| 19 |                                 |     |                                                                               |       |
| 20 | Protocol                        | 25  | Plans for communicating important protocol modifications (eg,                 | 18    |
| 21 | amendments                      |     | changes to eligibility criteria, outcomes, analyses) to relevant parties      |       |
| 22 |                                 |     | (eg, investigators, REC/IRBs, trial participants, trial registries, journals, |       |
| 23 |                                 |     | regulators)                                                                   |       |
| 24 |                                 |     |                                                                               |       |
| 25 |                                 |     |                                                                               |       |
| 26 | Consent or assent               | 26a | Who will obtain informed consent or assent from potential trial               | 7     |
| 27 |                                 |     | participants or authorised surrogates, and how (see Item 32)                  |       |
| 28 |                                 |     |                                                                               |       |
| 29 |                                 | 26b | Additional consent provisions for collection and use of participant data      | NA    |
| 30 |                                 |     | and biological specimens in ancillary studies, if applicable                  |       |
| 31 |                                 |     |                                                                               |       |
| 32 | Confidentiality                 | 27  | How personal information about potential and enrolled participants will       | 18    |
| 33 |                                 |     | be collected, shared, and maintained in order to protect confidentiality      |       |
| 34 |                                 |     | before, during, and after the trial                                           |       |
| 35 |                                 |     |                                                                               |       |
| 36 |                                 |     |                                                                               |       |
| 37 | Declaration of                  | 28  | Financial and other competing interests for principal investigators for       | 19    |
| 38 | interests                       |     | the overall trial and each study site                                         |       |
| 39 |                                 |     |                                                                               |       |
| 40 | Access to data                  | 29  | Statement of who will have access to the final trial dataset, and             | 18    |
| 41 |                                 |     | disclosure of contractual agreements that limit such access for               |       |
| 42 |                                 |     | investigators                                                                 |       |
| 43 |                                 |     |                                                                               |       |
| 44 |                                 |     |                                                                               |       |
| 45 | Ancillary and                   | 30  | Provisions, if any, for ancillary and post-trial care, and for                | 17,18 |
| 46 | post-trial care                 |     | compensation to those who suffer harm from trial participation                |       |
| 47 |                                 |     |                                                                               |       |
| 48 | Dissemination                   | 31a | Plans for investigators and sponsor to communicate trial results to           | 01    |
| 49 | policy                          |     | participants, healthcare professionals, the public, and other relevant        |       |
| 50 |                                 |     | groups (eg, via publication, reporting in results databases, or other         |       |
| 51 |                                 |     | data sharing arrangements), including any publication restrictions            |       |
| 52 |                                 |     |                                                                               |       |
| 53 |                                 |     |                                                                               |       |
| 54 |                                 | 31b | Authorship eligibility guidelines and any intended use of professional        | 19    |
| 55 |                                 |     | writers                                                                       |       |
| 56 |                                 |     |                                                                               |       |
| 57 |                                 | 31c | Plans, if any, for granting public access to the full protocol, participant-  | 18    |
| 58 |                                 |     | level dataset, and statistical code                                           |       |
| 59 |                                 |     |                                                                               |       |
| 60 |                                 |     |                                                                               |       |

## Appendices

|                            |    |                                                                                                                                                                                                |              |
|----------------------------|----|------------------------------------------------------------------------------------------------------------------------------------------------------------------------------------------------|--------------|
| Informed consent materials | 32 | Model consent form and other related documentation given to participants and authorised surrogates                                                                                             | See Appendix |
| Biological specimens       | 33 | Plans for collection, laboratory evaluation, and storage of biological specimens for genetic or molecular analysis in the current trial and for future use in ancillary studies, if applicable | NA           |

\*It is strongly recommended that this checklist be read in conjunction with the SPIRIT 2013 Explanation & Elaboration for important clarification on the items. Amendments to the protocol should be tracked and dated. The SPIRIT checklist is copyrighted by the SPIRIT Group under the Creative Commons "[Attribution-NonCommercial-NoDerivs 3.0 Unported](#)" license.

For peer review only



# BMJ Open

## Protocol for the Cultural Adaptation of Pulmonary Rehabilitation and Subsequent Testing in a Randomised Controlled Feasibility Trial for Adults with Chronic Obstructive Pulmonary Disease in Sri Lanka

|                               |                                                                                                                                                                                                                                                                                                                                                                                                                                                                                                                                                                                                                                                                                                                                                                                                                                                                                                                                                                                                                                                                                                                                                                                                                                                                                                                                                                                                                                                                                                                                                                                                                                                                                                                                                                                                                                                                                                                                                                                                                                                                                                                                                      |
|-------------------------------|------------------------------------------------------------------------------------------------------------------------------------------------------------------------------------------------------------------------------------------------------------------------------------------------------------------------------------------------------------------------------------------------------------------------------------------------------------------------------------------------------------------------------------------------------------------------------------------------------------------------------------------------------------------------------------------------------------------------------------------------------------------------------------------------------------------------------------------------------------------------------------------------------------------------------------------------------------------------------------------------------------------------------------------------------------------------------------------------------------------------------------------------------------------------------------------------------------------------------------------------------------------------------------------------------------------------------------------------------------------------------------------------------------------------------------------------------------------------------------------------------------------------------------------------------------------------------------------------------------------------------------------------------------------------------------------------------------------------------------------------------------------------------------------------------------------------------------------------------------------------------------------------------------------------------------------------------------------------------------------------------------------------------------------------------------------------------------------------------------------------------------------------------|
| Journal:                      | <i>BMJ Open</i>                                                                                                                                                                                                                                                                                                                                                                                                                                                                                                                                                                                                                                                                                                                                                                                                                                                                                                                                                                                                                                                                                                                                                                                                                                                                                                                                                                                                                                                                                                                                                                                                                                                                                                                                                                                                                                                                                                                                                                                                                                                                                                                                      |
| Manuscript ID                 | bmjopen-2020-041677.R1                                                                                                                                                                                                                                                                                                                                                                                                                                                                                                                                                                                                                                                                                                                                                                                                                                                                                                                                                                                                                                                                                                                                                                                                                                                                                                                                                                                                                                                                                                                                                                                                                                                                                                                                                                                                                                                                                                                                                                                                                                                                                                                               |
| Article Type:                 | Protocol                                                                                                                                                                                                                                                                                                                                                                                                                                                                                                                                                                                                                                                                                                                                                                                                                                                                                                                                                                                                                                                                                                                                                                                                                                                                                                                                                                                                                                                                                                                                                                                                                                                                                                                                                                                                                                                                                                                                                                                                                                                                                                                                             |
| Date Submitted by the Author: | 26-Oct-2020                                                                                                                                                                                                                                                                                                                                                                                                                                                                                                                                                                                                                                                                                                                                                                                                                                                                                                                                                                                                                                                                                                                                                                                                                                                                                                                                                                                                                                                                                                                                                                                                                                                                                                                                                                                                                                                                                                                                                                                                                                                                                                                                          |
| Complete List of Authors:     | <p>Jayamaha, Akila; KIU, Health Sciences<br/> Perera, Chamilya; KIU, Health Sciences<br/> Orme, Mark; University Hospitals of Leicester NHS Trust, Centre for Exercise and Rehabilitation Science, NIHR Leicester Biomedical Research Centre-Respiratory; University of Leicester, Department of Respiratory Sciences<br/> Jones , Amy; University Hospitals of Leicester NHS Trust, Centre for Exercise and Rehabilitation Science, NIHR Leicester Biomedical Research Centre-Respiratory; University of Leicester, Department of Respiratory Sciences<br/> Wijayasiri, Upendra; Colombo South Teaching Hospital, Sports Medicine Unit<br/> Amarasekara, Thamara; University of Sri Jayewardenepura, Faculty of Allied Health Sciences<br/> Karunatilake, Ravini ; National Hospital of Sri Lanka, Central Chest Clinic<br/> Fernando, Amitha; National Hospital of Sri Lanka, Central Chest Clinic<br/> Seneviratne, Anthony ; Primary Care Respiratory Group<br/> Barton, Andy; University of Plymouth, Faculty of Health<br/> Jones, Rupert; University of Plymouth, Faculty of Health<br/> Yusuf, Zainab; Centre for Exercise and Rehabilitation Science, NIHR Leicester Biomedical Research Centre-Respiratory, University Hospitals of Leicester NHS Trust; University of Leicester, Department of Respiratory Sciences<br/> Miah, Ruhme ; University of Leicester, Department of Respiratory Sciences; University Hospitals of Leicester NHS Trust, Centre for Exercise and Rehabilitation Science, NIHR Leicester Biomedical Research Centre-Respiratory<br/> Malcolm, Dominic; Loughborough University, School of Sport, Exercise and Health Sciences<br/> Matheson, Jesse; University of Sheffield, Department of Economics<br/> Free, Robert; University of Leicester, Department of Respiratory Sciences,<br/> Manise, Adrian ; University of Leicester, Department of Respiratory Sciences<br/> Steiner, michael ; University of Leicester, Department of Respiratory Sciences; University Hospitals of Leicester NHS Trust, Centre for Exercise and Rehabilitation Science, NIHR Leicester Biomedical Research Centre-Respiratory</p> |

|                                    |                                                                                                                                                                                                                                                                                                                         |
|------------------------------------|-------------------------------------------------------------------------------------------------------------------------------------------------------------------------------------------------------------------------------------------------------------------------------------------------------------------------|
|                                    | Wimalasekera, Savithri; University of Sri Jayewardenepura, Faculty of Medical Sciences<br>Singh, Sally; University of Leicester, Department of Respiratory Sciences; University Hospitals of Leicester NHS Trust, Centre for Exercise and Rehabilitation Science, NIHR Leicester Biomedical Research Centre-Respiratory |
| <b>Primary Subject Heading</b> :   | Respiratory medicine                                                                                                                                                                                                                                                                                                    |
| <b>Secondary Subject Heading</b> : | Rehabilitation medicine                                                                                                                                                                                                                                                                                                 |
| <b>Keywords</b> :                  | REHABILITATION MEDICINE, Chronic airways disease < THORACIC MEDICINE, Emphysema < THORACIC MEDICINE, Protocols & guidelines < HEALTH SERVICES ADMINISTRATION & MANAGEMENT                                                                                                                                               |
|                                    |                                                                                                                                                                                                                                                                                                                         |

SCHOLARONE™  
Manuscripts



I, the Submitting Author has the right to grant and does grant on behalf of all authors of the Work (as defined in the below author licence), an exclusive licence and/or a non-exclusive licence for contributions from authors who are: i) UK Crown employees; ii) where BMJ has agreed a CC-BY licence shall apply, and/or iii) in accordance with the terms applicable for US Federal Government officers or employees acting as part of their official duties; on a worldwide, perpetual, irrevocable, royalty-free basis to BMJ Publishing Group Ltd ("BMJ") its licensees and where the relevant Journal is co-owned by BMJ to the co-owners of the Journal, to publish the Work in this journal and any other BMJ products and to exploit all rights, as set out in our [licence](#).

The Submitting Author accepts and understands that any supply made under these terms is made by BMJ to the Submitting Author unless you are acting as an employee on behalf of your employer or a postgraduate student of an affiliated institution which is paying any applicable article publishing charge ("APC") for Open Access articles. Where the Submitting Author wishes to make the Work available on an Open Access basis (and intends to pay the relevant APC), the terms of reuse of such Open Access shall be governed by a Creative Commons licence – details of these licences and which [Creative Commons](#) licence will apply to this Work are set out in our licence referred to above.

Other than as permitted in any relevant BMJ Author's Self Archiving Policies, I confirm this Work has not been accepted for publication elsewhere, is not being considered for publication elsewhere and does not duplicate material already published. I confirm all authors consent to publication of this Work and authorise the granting of this licence.

1  
2  
3  
4 1 **Protocol for the Cultural Adaptation of Pulmonary Rehabilitation and Subsequent Testing**  
5  
6 2 **in a Randomised Controlled Feasibility Trial for Adults with Chronic Obstructive**  
7  
8 3 **Pulmonary Disease in Sri Lanka**  
9

10 4 Akila R Jayamaha <sup>1</sup>, Chamilya H Perera <sup>1</sup>, Mark W Orme <sup>2,3</sup>, Amy V Jones <sup>2,3</sup>, Upendra K D C Wijayasiri  
11 5 <sup>4</sup>, Thamara D Amarasekara <sup>5</sup>, Ravini de S Karunatillake <sup>6</sup>, Amitha C Fernando <sup>6</sup>, Seneviratne A L P De  
12 6 S.<sup>7</sup>, Andy Barton <sup>8</sup>, Rupert Jones <sup>8</sup>, Zainab K Yusuf <sup>2,3</sup>, Ruhme B Miah <sup>2,3</sup>, Dominic Malcolm <sup>9</sup>, Jesse A  
13 7 Matheson <sup>10</sup>, Robert C Free <sup>3</sup>, Adrian Manise <sup>3</sup>, Michael C Steiner <sup>2,3</sup> Savithri W Wimalasekera <sup>11</sup>, Sally J  
14 8 Singh <sup>2,3</sup>  
15 9

16 10 Correspondence to Akila Randika Jayamaha/1226arj@gmail.com/akila@kiu.ac.lk  
17

18 11 **Abstract**  
19

20  
21 12 **Introduction** International guidelines recommend pulmonary rehabilitation (PR) should be  
22  
23 13 offered to adults living with COPD, but there is limited PR available in Sri Lanka. Culturally  
24  
25 14 appropriate PR needs to be designed and implemented in Sri Lanka. The study aims to adapt PR  
26  
27 15 to the Sri Lankan context and determine the feasibility of conducting a future trial of the adapted  
28  
29 16 PR in Sri Lanka.

30  
31 17 **Methods and analysis** Phase-1: Develop the intervention: Focus groups with adults living with  
32  
33 18 COPD, caregivers and nurses and in-depth interviews with doctors and physiotherapist will be  
34  
35 19 conducted to inform PR adaptations. Phase-2: Randomised controlled feasibility trial will be  
36  
37 20 conducted in Central Chest Clinic, Colombo, Sri Lanka. Eligible participants will be identified  
38  
39 21 and will be invited to take part. A total of 50 participants will be recruited to the trial and  
40  
41 22 randomised (1:1) into one of two groups; control group receiving usual care or the intervention  
42  
43 23 group also receiving PR. The PR programme is likely to consist of 12 sessions of exercises and  
44  
45 24 health education, delivered over 6 weeks. After completion of PR, routine measures in both  
46  
47 25 groups will be assessed by a blinded assessor. The primary outcome measure is feasibility,  
48  
49 26 including assessing eligibility, uptake and completion. Phase-3: Qualitative evaluation of the  
50  
51 27 trail: Focus groups with participants and in-depth interviews with PR deliverers will be  
52  
53 28 conducted to further determine feasibility and acceptability of PR, as well as ability to run a  
54  
55 29 larger trial.

56 30 **Ethics and dissemination** Ethical approval was obtained from the ethics review committee of  
57  
58 31 the Faculty of Medical Sciences, University of Sri Jayewardenepura, Sri Lanka and the  
59

1  
2  
3 32 University of Leicester, UK. The results of the trial will be disseminated through patient and  
4  
5 33 public involvement events, local and international conference proceedings, and peer-reviewed  
6  
7 34 journals.

8  
9 35 Trial registration: ISRCTN13367735

10  
11 36 **Keywords:** COPD, Pulmonary Rehabilitation, Exercise, Education, Sri Lanka  
12  
13 37

14 38  
15 39 **Strengths and limitations**

- 16  
17 40 • This study is the first examining the feasibility and acceptability of a culturally  
18  
19 41 appropriate pulmonary rehabilitation programme for adults with COPD in Sri Lanka.  
20  
21 42 • Taking a mixed-method approach, this study will provide a rich insight into delivering a  
22  
23 43 trial of pulmonary rehabilitation in the Sri Lankan context.  
24  
25 44 • This study is a single center feasibility trial. As such, whilst findings will be an important  
26  
27 45 first step in understanding the potential role of pulmonary rehabilitation in Sri Lanka and  
28  
29 46 low- and middle-income countries more broadly, findings may not be generalizable to  
30  
31 47 other regions of the world.  
32  
33  
34  
35  
36  
37  
38  
39  
40  
41  
42  
43  
44  
45  
46  
47

## 48 INTRODUCTION

49 Chronic obstructive pulmonary disease (COPD) is a progressive disease characterised by airflow  
50 obstruction and breathlessness. COPD is a major cause of morbidity and mortality throughout the  
51 world, corresponding to 6% of all deaths worldwide.<sup>1</sup> Further, more than 90% of COPD deaths  
52 occur in low and middle-income countries.<sup>2</sup> The most recent estimate of COPD prevalence in  
53 South Asia was 6.3%<sup>3</sup> with a prevalence in Sri Lanka of 10.5%,<sup>4</sup> similar to the estimated global  
54 COPD prevalence of 11.7%.<sup>5</sup> COPD is a significant burden to both patients and healthcare  
55 services.<sup>6</sup>

56 Chronic cough with sputum, breathlessness, physical inactivity and exercise intolerance resulting  
57 from dyspnoea or fatigue are common consequences of COPD.<sup>1</sup> Symptoms of COPD  
58 progressively worsen and people can become breathless, even at rest. Daily activities often  
59 become difficult as the condition worsens, impacting their quality of life.<sup>7</sup> The impact of COPD  
60 to the individual and to society makes the need for interventions to reverse the associated  
61 disability of paramount importance.

62 International guidelines recommend that pulmonary rehabilitation (PR) should be routinely  
63 offered to patients with chronic respiratory disease who have persistent symptoms, limited  
64 activity, and/or are unable to adjust to illness.<sup>8,9</sup> It is a low cost, high impact intervention that  
65 improves the quality of life, reduces suffering, reduces mortality and reduces economic loss,  
66 relieves dyspnoea and fatigue, improves exercise capacity, improves psychological and  
67 emotional function, and enhances an individual's self-management of their condition.<sup>1</sup> Having  
68 realised the benefits of PR in COPD, Western countries have incorporated this as an important  
69 structural component of healthcare delivery services.<sup>10</sup> Implementation of PR based as practiced  
70 in Western countries, in Sri Lanka requires adaptation to the local health service, population and  
71 culture. Despite its effectiveness, there is a significant need to understand the feasibility of  
72 conducting PR in low resource Sri Lankan health care setting and the acceptability of PR among  
73 Sri Lankan adults living with COPD and healthcare staff involved in its delivery. Uptake and  
74 completion of PR even in Western countries is an on-going challenge.<sup>11</sup> The need to maximize  
75 appeal of PR to patients and referrers is a global issue and one that is likely to be specific to a  
76 given location and population. There remains an unmet need for PR in Sri Lanka. To be

1  
2  
3 77 successful, PR must be not only evidence-based, but also designed and implemented in a manner  
4 78 sensitive to the context in which it is being delivered, such as culture and geography. Therefore,  
5 79 the aim of this study is to devise an appropriate PR programme and then determine the feasibility  
6 80 and acceptability of this programme for adults living with COPD in Sri Lanka and assess the  
7 81 potential for a future trial of its effectiveness.

11  
12  
13 82 The objectives of the study are to:

- 14  
15 83 1. Explore the needs and perceptions of adults living with COPD, their care-givers /family  
16 84 members and health care professionals to inform the adaptations required for a PR programme  
17 85 suitable for the Sri Lankan context.  
18  
19 86 2. Determine the feasibility of conducting adapted hospital-based PR for people living with  
20 87 COPD.  
21  
22 88 3. Assess the acceptability of the PR among Sri Lankan adults living with COPD and healthcare  
23 89 staff involved in its delivery.  
24  
25 90 4. Describe any changes in health of the adults living with COPD following completion of PR.  
26  
27 91 5. Assess the feasibility of a future trial and estimate the required sample size.  
28  
29  
30  
31  
32  
33  
34  
35  
36  
37  
38  
39  
40  
41  
42  
43  
44  
45  
46  
47  
48  
49  
50  
51  
52  
53  
54  
55  
56  
57  
58  
59  
60

## 93 **METHODS AND ANALYSIS**

### 94 **Study design and registration**

95 The proposed study will be conducted in three phases. Phase 1: A qualitative study will be  
96 conducted to inform the adaptations required to make PR specific to the Sri Lankan context.  
97 Phase 2 is a single blind randomised control feasibility trial. Adults living with COPD will be  
98 randomised (1:1) into adapted PR or usual care. Phase 3: Qualitative evaluation of the trial to  
99 determine the feasibility and acceptability of PR deliverers and participants. The trial will be  
100 conducted, analysed and reported according to the Standard Protocol Items: Recommendations  
101 for Interventional Trials (SPIRIT) statement <sup>12</sup> and trial has been registered on the ISRCTN  
102 website. Study was commenced upon ethical approval on 24/07/2020 for Phase 1 of the study.  
103 The design of the study and flow of participant enrolment is presented in figure 1.

### 104 **Study setting**

105 The study will be carried out at the Central Chest Clinic, Colombo, Sri Lanka which is a leading  
106 health care facility that provides treatment for adults with respiratory disease. A room allowing  
107 confidential discussions will be used for conducting focus group discussions among adults living  
108 with COPD, their caregivers /family members, and nurses. Semi structured interviews will be  
109 conducted among doctors and physiotherapists in a given quiet room at the Central Chest Clinic  
110 as convenient to them and without interfering with their routine work. The venue for PR will be a  
111 large room at the Central Chest Clinic.

### 112 **Participants**

113 Key informants and suitable participants for phase 1 of the study will be identified by the  
114 researchers with the help of health care professionals involved in the treatment of COPD at  
115 Central Chest Clinic. Suitable participants will be purposively selected and informed verbally  
116 about the study by the researchers. After receiving a study information sheet, potential  
117 participants will be contacted to arrange an appointment, if they wish to take part. An  
118 opportunity to ask questions will be provided. If willing to take part in the study, they will be  
119 asked to provide written informed consent. Multi-religious and multi-ethnic Sri Lankan cultural  
120 diversity and gender will be considered when recruiting to the study. Adults living with COPD  
121 aged  $\geq 18$  years and Medical Research Council (MRC) dyspnoea score grade 2 or higher, Family  
122 member aged  $\geq 18$  years and looks after a patient with COPD and Health care professionals who  
123 have more than 1-year experience of managing patients with COPD and working in the  
124 government health care system of the country will be eligible to participate in the phase 1 of the  
125 study. Participants who provide written informed consent will be enrolled in the study.

126 After the adaptation of PR in phase 1, suitable participants for the Phase 2 randomised controlled  
127 feasibility trial will be identified by the Medical Officers in the Chest Clinic and will be invited  
128 to take part in an eligibility assessment. This assessment will determine eligibility for entry into  
129 the study. People eligible for inclusion in the trial will be: aged  $\geq 18$  years, will have a clinically  
130 confirmed diagnosis of COPD by a physician, confirmed COPD with spirometry based on  
131 GOLD criteria with  $FEV_1/FVC < 0.7$ , and  $FEV_1 < 80\%$  predicted,  $\geq 1$  exacerbation required a  
132 hospitalisation in the year preceding study, mMRC grade  $\geq 2$  and willing to provide informed  
133 consent. Adults with comorbidities such as severe or unstable cardiovascular, other internal



1  
2  
3 134 diseases and locomotor difficulties that preclude the exercise or malignant disease or other  
4  
5 135 serious illness which will interfere with participation in the PR, will be excluded from the study.  
6  
7 136 Individuals not eligible for the study will be recorded on a study screening log.

8  
9 137 [insert figure 1 here]  
10  
11 138

## 14 139 **Procedure**

16  
17 140 Eligible participants will be informed verbally about the study by the Medical Officers of the  
18  
19 141 Central Chest Clinic. After receiving a study information sheet, potential participants will be  
20  
21 142 contacted to arrange an appointment, if they wish to take part. An opportunity to ask questions  
22  
23 143 will be provided. If willing to take part in the study, they will be asked to provide written  
24  
25 144 informed consent. Information regarding the interest of participation in the study will be taken as  
26  
27 145 field notes. Baseline outcome measures will be assessed. After baseline data collection,  
28  
29 146 participants will be randomised (1:1) into two groups. One group will receive usual care and PR  
30  
31 147 and the other group will receive only usual care which consists of pharmacological treatment and  
32  
33 148 brief information about disease condition, medication and inhaler techniques. Experiences of the  
34  
35 149 participants and PR deliverers regarding the acceptability and feasibility of PR will be explored  
36  
37 150 in interviews and focus groups during Phase 3 of the study. Participants who did not complete  
38  
39 151 the PR will be asked to take part in a drop-out interview and information provided freely by the  
40  
41 152 participants will be collected as field notes.

40 153

## 41 154 **Trial interventions**

### 42 155 **Intervention: Adapted pulmonary rehabilitation**

43  
44 156 Sri-Lankan specific PR will comprise the core elements of an evidence based rehabilitation, a  
45  
46 157 programme of exercises<sup>13, 14</sup> and health education.<sup>13, 14, 15</sup> The detail of delivery and adaptations  
47  
48 158 of PR will be informed by findings of the Phase 1 of the study. PR is typically a 6-week rolling  
49  
50 159 programme that consists of 12 sessions in total.<sup>13, 14</sup> Sessions usually last approximately two  
51  
52 160 hours, with one hour for exercise training and one hour for education. All the education sessions  
53  
54 161 and the instructions during PR will be provided in Sinhala language as convenient to the  
55  
56 162 participants. The duration of the PR trial and frequency and duration of sessions will be

1  
2  
3 163 discussed during Phase 1. All staff delivering PR will be trained and assisted by a nursing  
4 164 officer, a clinical nutritionist, an exercise physician and a physiotherapist. The venue for PR will  
5 165 be at the Central Chest Clinic, Colombo, Sri Lanka. The Central Chest Clinic will have a  
6 166 maximum capacity of 10 patients per PR class. The equipment required will be simple and  
7 167 include chairs, weights, and simple exercise equipment based on local availability, suitability and  
8 168 informed by qualitative work.<sup>16</sup>

13 169  
14  
15 170 In keeping with evidence-based guidelines<sup>13, 14</sup>, discussions in Phase 1 will include the core  
16 171 exercise component of PR, notably resistance training (e.g. upper and lower limbs) and aerobic  
17 172 training (walking, sit-to-stand, step-ups) using minimal equipment and education. Each  
18 173 participant's exercise regimen will be individually prescribed and progressed<sup>17</sup> with walking  
19 174 speed will be prescribed using the ISWT.<sup>18</sup> The process in which this is achieved by patients will  
20 175 be informed by Phase 1. The education component will be delivered by an interdisciplinary team  
21 176 and will be informed by qualitative findings from Phase 1 with discussions facilitated by usual  
22 177 education topics as described in guidelines.<sup>13, 14</sup>

## 30 178 **Usual care**

31  
32 179 Usual care will consist of pharmacological treatment and optimization, prescribed to patients  
33 180 after consultation with Medical Officers at the Central Chest Clinic. Brief information about  
34 181 disease condition, medication and inhaler techniques will be provided by Medical Officers and  
35 182 Nurses. Pulmonary rehabilitation or any form of exercise recommendation is not part of usual  
36 183 care.

## 42 184 **Outcomes**

### 45 185 **Primary outcome**

46  
47 186 The primary outcome of the trial will be the feasibility and the acceptability of the PR  
48 187 intervention.

### 52 188 **Feasibility**

189 Measures to assess feasibility are provided in table 1 and include the comprehensive assessment  
 190 of the feasibility of patient recruitment and the intervention delivery.

| <b>Table 1: Primary outcome measures- Feasibility and operational experience assessment</b>                                                                                                                                                  |                                                                                                         |
|----------------------------------------------------------------------------------------------------------------------------------------------------------------------------------------------------------------------------------------------|---------------------------------------------------------------------------------------------------------|
| <b>Feasibility of patient recruitment</b>                                                                                                                                                                                                    | <b>Data sources</b>                                                                                     |
| Feasibility of screening and recruiting participants                                                                                                                                                                                         | Interviews with the healthcare professionals, screening log                                             |
| Suitability of the inclusion criteria                                                                                                                                                                                                        | Interviews with the healthcare professionals, screening log                                             |
| Number of eligible patients, number of patients screened, number of patients invited to take part, actual number of participants who consent to take part                                                                                    | Screening log                                                                                           |
| Number of patients who refuse, drop out and the reasons for refuse and drop out                                                                                                                                                              | Interviews with the patients, screening log                                                             |
| <b>Operational experience of intervention delivery</b>                                                                                                                                                                                       |                                                                                                         |
| Service provider and multi-disciplinary teams' willingness and ability to deliver the PR                                                                                                                                                     | Interviews with healthcare professionals                                                                |
| The practicality of delivering the intervention in the proposed setting                                                                                                                                                                      | Interviews with healthcare professionals and focus groups with participants                             |
| The time needed to collect the data<br>Baseline visit- Time taken for each measure (each individual questionnaire and physical measure)<br>Follow-up visit- Time taken for each measure (each individual questionnaire and physical measure) | Interviews with the healthcare professionals, Rehabilitation records                                    |
| Data completeness and accuracy                                                                                                                                                                                                               | Interviews with the healthcare professionals, Rehabilitation records, RedCap                            |
| Adherence to home exercise                                                                                                                                                                                                                   | Interviews with the patients and self-report exercise diary                                             |
| The training and resources needed to deliver the intervention (ensuring readiness for a future much larger multi-center trial)                                                                                                               | Interviews with the healthcare professionals and focus groups with participants, Rehabilitation records |
| Description of unintended events                                                                                                                                                                                                             | Adverse events log, REDCap                                                                              |

### 191 **Acceptability**

192 The acceptability of the PR intervention among adults living with COPD and healthcare staff  
 193 involved in its delivery will be assessed. Participants' experience of the PR, including any  
 194 perceived benefits, challenges and changes they would make to the programme, will be explored  
 195 in qualitative interviews and focus groups after their discharge assessment or withdrawal. The  
 196 experience of healthcare professionals regarding the PR intervention, such as their confidence in  
 197 delivering the programme, the components of PR, structure of PR, the patient adherence to the

198 PR exercises and how their perceptions changed over the course of the trial, insights into barriers  
 199 and facilitators to referral, uptake and completion of PR ((i) attending at least 10 out of 12  
 200 designated PR sessions and (ii) attending the follow-up evaluation) will be explored in  
 201 qualitative interviews at the end of the trial.

## 202 **Secondary outcomes**

203 The secondary outcomes of this study are provided in table 2. Comparison of secondary outcome  
 204 measures of baseline and post intervention, will describe any changes in the health of the adults  
 205 living with COPD following completion of PR

**Table 2: Secondary outcome measures**

| Outcome measures                                                                                                        | Baseline | Post-intervention |
|-------------------------------------------------------------------------------------------------------------------------|----------|-------------------|
| Socio-demographics                                                                                                      | x        |                   |
| Lung health (spirometry data, smoking status, number of COPD exacerbations in the last year)                            | x        |                   |
| Comorbidities                                                                                                           | x        |                   |
| Treatments                                                                                                              | x        |                   |
| Nutritional status (Body Mass Index, mid upper arm circumference, skinfold thickness, self-report seven-day diet diary) | x        | x                 |
| Disease burden (MRC dyspnea grade, CAT, CCQ)                                                                            | x        | x                 |
| Economic impact of disease (WPAI)                                                                                       | x        | x                 |
| Quality of life (EQ-5D-5L)                                                                                              | x        | x                 |
| Pittsburgh Sleep Quality Index (PSQI)                                                                                   | x        | x                 |
| Psychological wellbeing (Hospital Anxiety and Depression scale)                                                         | x        | x                 |
| Physical function (5x sit-to-stand test)                                                                                | x        | x                 |
| Exercise capacity (ISWT, ESWT)                                                                                          | x        | x                 |
| International Physical Activity Questionnaire (IPAQ)                                                                    | x        | x                 |
| Accelerometer assessed physical activity (ActiGraph wGT3x-BT)                                                           | x        | x                 |

206 MRC - Medical Research Council, CAT- COPD Assessment Test, CCQ - Clinical COPD Questionnaire,  
 207 WPAI – Work Productivity and Activity Impairment questionnaire, EQ-5D-5L - EuroQol Five  
 208 Dimensions Five Levels, ISWT - Incremental Shuttle Walk Test, ESWT - Endurance Shuttle Walk Tests

## 209 **Sample size and recruitment target**

210 This study is a feasibility trial that aims to provide data for an accurate estimation of the required  
 211 sample size for future trials. Therefore, a formal sample size calculation is not required. We aim  
 212 to recruit and randomise 50 participants to the study (25 in each group).

## 213 **Patient allocation, concealment, and blinding**

214 Randomisation will occur through random permuted blocks to either the intervention group (PR+  
215 usual care) or control group (usual care) in ratio 1:1 using Sealed envelope™.

216 The computer-generated patient allocation sequence will be monitored by an individual who is  
217 independent of the research team and will inform the research team of group allocations via  
218 telephone. Participants will be informed about their group allocation after providing informed  
219 consent and completing baseline assessments.

220 It will not be possible to blind patients to their group allocation due to the nature of PR. Research  
221 staff will be blinded to outcome measures. Participants will be advised not to reveal their group  
222 during the follow-up assessment. Any episodes of un-blinding will be documented and reported.

## 223 **Data collection**

224 *Phase 1: Qualitative assessment for adaptation of PR*

### 225 **Focus groups with patient and family caregivers**

226 Focus groups with adults living with COPD and separate focus groups with their family  
227 members/ caregivers will be conducted until data saturation. We anticipate conducting up to 5  
228 focus groups with 6-8 participants in each. Data will be collected during patients' clinic visits.  
229 Focus group discussions will be audio-recorded, expected to last approximately 45-90 minutes,  
230 and will be conducted face-to-face by an interviewer and note-taker (observer). Focus groups  
231 will be transcribed verbatim, with identifiable information removed. Envisaged outcomes of the  
232 focus groups will include Sri Lankan specific adaptation of PR.

### 233 **Interviews with healthcare professionals involving the treatment of COPD**

234 Up to 15 in-depth interviews with healthcare professionals will be conducted until data  
235 saturation. Structured interviews will be conducted with healthcare professionals as convenient  
236 to them without interfering with their routine work. Interviews will be audio-recorded and will  
237 be conducted face-to-face by an interviewer. Interviews will be transcribed verbatim, with

238 identifiable information removed. Envisaged outcomes of the in-depth interviews will be a  
239 suitable design and content of PR acceptable respiratory health care deliverers in Sri Lanka.

#### 240 *Phase 2: Single blind randomised control feasibility trial*

241 Data will be collected by trained researchers, following standard operating procedures during  
242 participants' clinic visits. Baseline and post intervention assessments will be carried out by the  
243 blinded Medical Officers consulting at the study setting.

244

#### 245 *Phase 3: Qualitative evaluation of the PR intervention*

##### 246 **Focus groups with patients**

247 Participants allocated to the intervention group will be invited to participate in focus group  
248 discussions at the end of their PR programme. Focus groups will give an insight on views,  
249 experiences, opinions and recommendations which will inform future PR programmes. We  
250 anticipate conducting up to 5 focus groups until data saturation. Each focus group discussion will  
251 be conducted with 6-8 participants in each.

252 Focus group discussions will be audio-recorded, expected to last approximately 45-90 minutes,  
253 and will be conducted by a trained moderator and a note-taker). Focus groups will be transcribed  
254 verbatim, with identifiable information removed. Consent will be obtained from participants  
255 prior to their involvement in focus groups.

##### 256 **Interviews with PR staff**

257 Health care personnel involved in delivering PR will be invited to participate in in-depth  
258 interviews at the end of the study to discuss aspects of feasibility and acceptability, such as  
259 insights into barriers and facilitators to attendance, logistical barriers of running a PR programme  
260 and their perceptions, confidence of programme delivery and patients' experiences of the  
261 intervention. Details regarding previous experience on PR and prior training regarding PR will  
262 be assessed using brief questionnaire before commencing the in-depth interviews. We anticipate  
263 conducting up to 15 interviews, each expected to last approximately 15-60 minutes. Interviews

264 will be audio-recorded and will be conducted face-to-face by a trained interviewer. Interviews  
265 will be transcribed verbatim, with identifiable information removed.

#### 266 Book of testimonies and evaluation form

267 Participants within PR will be asked to log their experience of PR as they progress through the  
268 programme. This will be in the form of a PR log book accessible to participants before, during  
269 and after sessions, as well as a dedicated evaluation form which will be provided as  
270 supplementary material. Staff involved in PR will also receive the same evaluation form at the  
271 end of the study.

#### 273 Sample characteristics

274 Basic demographics including age, sex, religion, nationality, marital status, age of leaving full-  
275 time education, education level, ethnicity, employment status, monthly income, lung health,  
276 smoking status (packs per year), biomass fuel exposure, primary respiratory diagnosis, time since  
277 diagnosis in years, secondary respiratory diagnoses, family history of lung disease, comorbidities  
278 will be recorded at baseline.

#### 279 Lung function

280 Spirometry (post bronchodilator Forced Expiratory Volume in the first second (FEV<sub>1</sub>), post  
281 bronchodilator Forced Vital Capacity (FVC), FEV<sub>1</sub>/FVC ratio, carboxyhemoglobin test<sup>19</sup>,  
282 hospitalisations within the last 12 months, number of COPD exacerbations within the last 12  
283 months, treatments will be collected as the baseline data prior to the randomisation of  
284 participants.

#### 285 Nutritional status

286 Height (Holtain stadiometer), weight (calibrated weight scale) will be measured and body mass  
287 index will be calculated. Mid upper arm circumference of the participants will be measured using  
288 a measuring tape and skinfold thickness of seven sites (triceps, mid axillary, subscapular, chest,  
289 abdominal, supra iliac and thigh measurements) of the body will be measured using a validated  
290 caliper. Triplicated measurements will be taken by the same investigator and mean value will be



1  
2  
3 291 used for the calculation of body fat mass. Fat free mass will be calculated using Durnin and  
4  
5 292 Womersley formula.<sup>20, 21</sup> Body composition analysis will be assessed using bioelectrical  
6  
7 293 impedance (SFB7 Impedi Med dual frequency instrument, Impedi Med Limited, Australia) and  
8  
9 294 software version 5.2.4.0.<sup>22</sup> Seven-day diet diary method will be used to assess the dietary history  
10  
11 295 and calorie intake.

## 12 13 296 Disease burden

14  
15 297 Breathlessness will be measured using MRC dyspnoea grade (5-items).<sup>23</sup> The health-related  
16  
17 298 quality of life related to mobility, self-care, usual activities, pain/discomfort and anxiety-  
18  
19 299 depression will be measured using EQ-5D-5L (25-items),<sup>24</sup> Clinical status of the airways,  
20  
21 300 functional limitations and psychosocial dysfunction will be determined using CCQ (10 -items),<sup>25</sup>  
22  
23 301 CAT (8-items) will be used to determine the severity of the COPD,<sup>26</sup> Modified brief pain  
24  
25 302 inventory (3-items) will determine the commonly reported chest pain, WPAI (8-items) will be  
26  
27 303 used to measure the effect of severity of COPD and general health on work productivity and  
28  
29 304 regular activities<sup>27</sup> and HADS (14-items) will be used to measure the patient's emotional state  
30  
31 305 and the presence or absence of clinically significant anxiety and depression.<sup>28</sup> Sleep quality of  
32  
33 306 the participants will be measured using Pittsburgh Sleep Quality Index (PSQI)<sup>29</sup>. Disease burden  
34  
35 307 will be measured as baseline data prior to the randomisation and post-intervention data.

## 36 308 Exercise capacity

37  
38 309 Following a safety assessment for absolute and relative contraindications for field walking  
39  
40 310 tests<sup>30</sup>, maximal exercise capacity will be assessed using the incremental shuttle walking test  
41  
42 311 (ISWT)<sup>31</sup> and endurance shuttle walking test (ESWT).<sup>18</sup> The ISWT and ESWT also include a  
43  
44 312 pre-test and post-test measure of SpO<sub>2</sub>, blood pressure, Borg rating of breathlessness<sup>32</sup>, heart  
45  
46 313 rate, Borg rate of perceived exertion.<sup>33</sup> The sit-to stand test will be completed for five continuous  
47  
48 314 repetitions, to measure lower limb movement and strength.<sup>34</sup> All measures of exercise capacity  
49  
50 315 will be measured at baseline prior to the randomisation and post-intervention.

## 51 316 Physical activity

52  
53 317 Subjective health-related physical activity will be measured with the International Physical  
54  
55 318 Activity Questionnaire (IPAQ)<sup>35</sup> at baseline prior to the randomisation and post-intervention.



319 Participants will be asked to wear an activity monitor (ActiGraph wGT3X-BT, ActiGraph,  
 320 Pensacola, FL, USA), able to detect a range of PA intensities<sup>36</sup>, on the right anterior hip during  
 321 waking hours for seven days prior to attending PR (baseline) and for the seven consecutive days  
 322 prior to their discharge assessment (follow-up); taking it off for water-based activities and sleep.  
 323 The collection of physical activity data will coincide with a 7-day diet diary. Printed instructions  
 324 will be provided to the participants regarding how to wear the monitor.

325 Full accelerometry methodology is provided in Table 3. Data will be processed as 60-s epoch  
 326 files in ActiLife version 6.13.4 (ActiGraph, Pensacola, FL, USA). Non-wear will be defined as  
 327 60-minutes of consecutive zero counts with allowance for 2-minutes of interruptions.<sup>37</sup>

328 Adherence to wearing the monitors will be assessed by examining the proportion of participants  
 329 providing valid accelerometer data across a range of valid days ( $\geq 1-7$  days) and minimum wear  
 330 time ( $\geq 1-12$  hours) thresholds. For reported group averages, only participants providing  $\geq 4$  valid  
 331 days of  $\geq 8$  hours, for both time points will be included in the analyses.<sup>38</sup> Step count, time spent  
 332 in different absolute intensity classifications of physical behaviours<sup>39</sup> and average movement  
 333 intensity (activity counts per minute) will be reported. Time spent in physical activity matching  
 334 participants' prescribed walking exercise intensity will be derived by aligning the average  
 335 walking speed during the ESWT with the activity monitor counts per minute.

336

**Table 3: Accelerometry data collection and processing parameters**

|                         |                                                                                                                                                                                                                                        |
|-------------------------|----------------------------------------------------------------------------------------------------------------------------------------------------------------------------------------------------------------------------------------|
| Accelerometer Model     | ActiGraph wGT3X-BT (version 6.13.4; firmware 1.9.2 )                                                                                                                                                                                   |
| Serial number range     | Twenty unique devices will be used ranging from MOS2E09190601 to MOS2E24190146 averaging six deployments per device (same serial used for baseline and follow-up wear periods)                                                         |
| Piezosensor orientation | Triaxial                                                                                                                                                                                                                               |
| Mode setup              | Mode 29 (x, y, z, steps, lux)                                                                                                                                                                                                          |
| Original sample rate    | 100 Hz (.gt3x file format)                                                                                                                                                                                                             |
| Deployment method       | Baseline:<br>Fitted by research team on Day 0 (Baseline PR Assessment)<br>Fitted by participant on Day 1<br>Follow-up:<br>Fitted by research team Day 0 (11 <sup>th</sup> /12 <sup>th</sup> session)<br>Fitted by participant on Day 1 |
| Location worn           | Anterior hip adjacent to the mid-line of the thigh                                                                                                                                                                                     |
| Requested days of wear  | 7 days of free-living (Day 1-7; 10,080 epochs)                                                                                                                                                                                         |

|                                     |                                                                                                                                                                                                                         |
|-------------------------------------|-------------------------------------------------------------------------------------------------------------------------------------------------------------------------------------------------------------------------|
| Initialization                      | Not deployed in delay mode in order to standardised capture of Day 0 (00:00) with stop time based on date of first PR class (baseline) and data of discharge assessment (follow-up)                                     |
| Wear instructions                   | Wear continuously except for sleep and water based activities                                                                                                                                                           |
| Non-wear appropriation              | $\geq 60$ min of consecutive 0s with allowance for 2 minutes of interruptions were deemed biologically implausible and coded as non-wear                                                                                |
| Valid day criteria                  | $\geq 8$ hours of valid waking wear time                                                                                                                                                                                |
| Valid file                          | $\geq 4$ valid days for each of the two time points                                                                                                                                                                     |
| Missing data                        | Data modelling or imputation will not be performed                                                                                                                                                                      |
| Epoch length                        | 60 seconds                                                                                                                                                                                                              |
| Intensity classification (absolute) | Uniaxial (x-axis) cut-points as follows: Sedentary time $< 100$ cpm; Light intensity 100-2019 cpm; Moderate intensity 2020-5998cpm; Vigorous intensity $\geq 5999$ cpm (Moderate-to-vigorous intensity $\geq 2020$ cpm) |
| Intensity classification (relative) | Uniaxial (x-axis) cut-points based on Endurance Shuttle Walk Test performance                                                                                                                                           |

337

## 338 Patient and Public Involvement

339 Adults living with COPD often tell us how having COPD impacts their lives and that they often  
340 find it challenging to know what they can do to better manage their condition. When they talk  
341 about their self-management strategies, it is clear that education and exercise support would be  
342 of value. Also, they revealed the necessity of a programme to support their condition and  
343 willingness to attend such a programme. Patients are generally positive about being able to  
344 access support but there is little available to them. The study was planned to fulfill the need of  
345 adults living with COPD. The delivery and adaptations of the trial intervention (Sri-Lankan  
346 specific PR) will also be informed by the adults living with COPD, their care-givers /family  
347 members and health care professionals. Priorities, experience, and preferences of the  
348 stakeholders will be utilized to design the PR. Health care professionals involved in the treatment  
349 of COPD at Central Chest Clinic will be involved in the recruitment as key informants and  
350 conduct of the study. The feasibility and acceptability of the PR intervention among adults living  
351 with COPD and healthcare staff involved in its delivery will be assessed in qualitative interviews  
352 at the end of the trial. The results of the trial will be disseminated through patient and public  
353 involvement events, local and international conference proceedings. As well as all the research

354 participants, stakeholders and individuals with COPD will be openly invited to take part in an  
 355 event organized at the central chest clinic to reveal the study findings.

356

### 357 **Costing**

358 As part of this trial, the cost of creating a Sri-Lankan adapted PR programme will be calculated.  
 359 This will include both single and recurrent costs. Single payments include the necessary costs to  
 360 set up and run a programme, whilst recurrent cost refers to any item with a life expectancy of 1  
 361 year or less and typically includes disposable materials.<sup>40</sup> The fixed costs will be captured prior  
 362 to the first participant enrolling into the programme and the recurrent costs will be collected at  
 363 the mid-stage of recruitment. An average cost per participant will be calculated. Table 4  
 364 demonstrates the variables that will be used to calculate fixed and recurrent costs.

365

**Table 4: The variables used to calculate fixed and recurrent costs (not an exhaustive list)**

| <b>Fixed costs</b>                                                                                                                                             | <b>Recurrent costs</b>                                                                                              |
|----------------------------------------------------------------------------------------------------------------------------------------------------------------|---------------------------------------------------------------------------------------------------------------------|
| Venue hire                                                                                                                                                     | Venue hire                                                                                                          |
| Electrical equipment (laptop, printer, projector)                                                                                                              | Staff time to conduct PR (assessment at baseline and discharge, conduct PR classes, telephone calls and data entry) |
| Equipment for PR (weights, treadmill, cycle ergometer, country-specific equipment, step-up box, chairs)                                                        | Disposable equipment (for blood glucose monitor, spirometer mouthpieces, nose-clips, glyceryl trinitrate spray)     |
| Equipment for shuttle walking tests (cones, licences, stop watches, tape measure, electrical equipment to play audio)                                          | Servicing costs (spirometer, PR equipment, specifically treadmills and cycle ergometers)                            |
| Equipment for PR assessment (height stadiometer, weight scales, sphygmomanometer, pulse oximeter, spirometer, calibration syringe, country-specific equipment) | Miscellaneous (Oxygen cylinders, questionnaire licences, stationery (paper))                                        |
| Additional safety equipment (blood glucose monitor, Oxygen cylinder holder)                                                                                    |                                                                                                                     |

|                                                                                                                   |  |
|-------------------------------------------------------------------------------------------------------------------|--|
| Miscellaneous (filing cabinets, storage units, questionnaire translations, questionnaire licences, staff uniform) |  |
|-------------------------------------------------------------------------------------------------------------------|--|

366

367

### 368 **Data management**

369 Data collected during the study will be entered into a database using Research Electronic Data  
370 Capture (REDCap), which is a web-based platform.<sup>41</sup> Access to the database will be via a secure  
371 password protected web-interface. The participants will be identified by a study-specific  
372 identification code. Data will be validated using real-time data entry validation and electronic  
373 checks lead by the Independent Data Monitoring Committee (IDMC), established at the  
374 University of Leicester, UK.

### 375 **Quantitative data analysis**

376 The data will be analyzed using IBM SPSS Statistics for Windows, Version 23.0. Data for  
377 baseline and follow-up time-points will be presented as descriptive statistics as appropriate. No  
378 inferential statistics will be performed due to the feasibility design of the trial.

### 379 **Qualitative data analysis**

380 Qualitative data will be analyzed using Thematic Analysis. This approach follows six distinct  
381 stages: familiarization with data; generating initial codes; searching for themes; reviewing  
382 themes; defining and naming themes and producing the report.<sup>42</sup> The responsible investigator  
383 will carry out initial coding and a sample of focus group transcripts will be coded by a second  
384 member of the team to improve consistency and to enhance interpretive authenticity. Throughout  
385 the data analysis, the team will meet to discuss and review emerging themes and search the  
386 accounts that provide contesting views of the same phenomena. Close attention will be paid to  
387 the complexity and interactions inherent in the focus group data.<sup>43</sup>

### 388 **Adverse events**

1  
2  
3 389 All adverse events and serious adverse events will be recorded on an adverse event log, within  
4  
5 390 study trial management paperwork, case report forms and REDCap. There will be no formal  
6  
7 391 interim analysis of data due to the feasibility nature of the trial. The IDMC will review high level  
8  
9 392 safety data. Adverse events will be monitored at least every month, and as needed on an ad hoc  
10  
11 393 basis, to ensure the continuing safety of the participants. The Scientific Committee will  
12  
13 394 determine the need to terminate the trial. Participants who experience any such event will be  
14  
15 395 directed to the appropriate hospital and all the necessary care will be ensured and followed-up  
16  
17 396 until the participant has resolved or stabilized.

18 397

### 21 398 **Ethics and dissemination**

23 399 Ethical approval was obtained from the ethics review committee of the Faculty of Medical  
24  
25 400 Sciences, University of Sri Jayewardenepura (FMS/USJP ERC 64/19) and the University of  
26  
27 401 Leicester, United Kingdom (26770). Further permission for the proposed study will be obtained  
28  
29 402 from the relevant authority at the Central Chest Clinic, Colombo, Sri Lanka. Privacy and the  
30  
31 403 confidentiality of all information and identities of participants will be strictly maintained and will  
32  
33 404 not be disclosed when publishing the results of the study. A copy of the test results obtained will  
34  
35 405 be provided to each participant at the end of the trial for subsequent follow-up and treatment at  
36  
37 406 the clinic. Compensation for travelling will be provided to all the participants. All study  
38  
39 407 documents will be translated to Sinhala and Tamil to ensure clear communication. Participation  
40  
41 408 will be without compulsion and each participant has the right to withdraw at any time, without  
42  
43 409 providing a reason. Consent form and data sheets will be securely stored in a separate locked  
44  
45 410 cupboard. Study computers will be password protected. The participants (adults living with  
46  
47 411 COPD) of the phase 1 study also will be provided the opportunity to participate the PR. All the  
48  
49 412 data will be stored safely up to 6 years and after 6 years consent form and data sheets will be  
50  
51 413 disposed of appropriately. Study team and IDMC only will have access to final trial dataset. Data  
52  
53 414 from the Global RECHARGE Core Dataset will be made available following the completion of  
54  
55 415 this project and we are considering the best tools to use to make this database available to the  
56  
57 416 wider community. Any modifications of the protocol will be updated on trial registry (ISRCTN)  
58  
59 417 and will be informed to the ethics review committee and the participants. Participants will be

1  
2  
3 418 provided the provisions for re-consenting after any change of the approved protocol. It will be  
4  
5 419 made clear in the publication of trial findings.  
6  
7

8 420

9  
10 421

## 11 12 13 422 **Author affiliations**

14  
15 423 <sup>1</sup>Faculty of Health Sciences, KAATSU International University, Sri Lanka

16 424 <sup>2</sup>Centre for Exercise and Rehabilitation Science, NIHR Leicester Biomedical Research Centre-  
17  
18  
19 425 Respiratory, University Hospitals of Leicester NHS Trust, UK

20 426 <sup>3</sup>Department of Respiratory Sciences, University of Leicester, Leicester, UK,

21 427 <sup>4</sup>Sports Medicine Unit, Colombo South Teaching Hospital, Kalubowila, Sri Lanka

22 428 <sup>5</sup>Department of Nursing and Midwifery, Faculty of Allied Health Sciences, University of Sri  
23  
24  
25 429 Jayewardenepura, Sri Lanka

26 430 <sup>6</sup>National Hospital of Sri Lanka and Central Chest Clinic, Colombo, Sri Lanka

27 431 <sup>7</sup>Primary Care Respiratory Group, Sri Lanka

28 432 <sup>8</sup>Faculty of Health, University of Plymouth, UK

29 433 <sup>9</sup>School of Sport, Exercise and Health Sciences, Loughborough University, UK

30 434 <sup>10</sup>Department of Economics, University of Sheffield, Sheffield, UK

31 435 <sup>11</sup>Faculty of Medical Sciences, University of Sri Jayewardenepura, Sri Lanka  
32  
33  
34  
35  
36  
37  
38  
39 436

## 40 41 42 437 **Author contribution**

43  
44 438 All authors (Akila R Jayamaha, Chamilya H Perera, Mark W Orme, Amy V Jones, Upendra K D  
45  
46 439 C Wijayasiri, Thamara D Amarasekara, Ravini de S Karunatillake, Amitha C Fernando,  
47  
48 440 Seneviratne A L P De S., Andy Barton, Rupert Jones, Zainab K Yusuf, Ruhme B Miah, Dominic  
49  
50 441 Malcolm, Jesse A Matheson, Robert C Free, Adrian Manise, Michael C Steiner, Savithri W  
51  
52 442 Wimalasekera, Sally J Singh) have substantially contributed to the conception and design of the  
53  
54 443 study. Akila R Jayamaha drafted the manuscript. All authors of the paper have revised the  
55  
56  
57  
58  
59  
60

1  
2  
3 444 content and approved the final version to be published. All authors are accountable for all aspects  
4  
5 445 of the work.

6  
7  
8 446 **Funding** This research was funded by the National Institute for Health Research (NIHR)  
9  
10 447 (17/63/20) using UK aid from the UK Government to support global health research. The views  
11  
12 448 expressed in this publication are those of the author(s) and not necessarily those of the NIHR or  
13  
14 449 the UK Department of Health and Social Care.

15  
16 450 **Competing interests** None declared.

17  
18 451

19  
20 452 [insert figure caption]

21  
22  
23 453 Figure 1: Flow of participant of the three phases of the study

24  
25  
26 454

27  
28 455 References

- 29  
30  
31 456 1. Singh D, Agusti A, Anzueto A, Barnes PJ, Bourbeau J, Celli BR, et al. Global Strategy for  
32  
33 457 the Diagnosis, Management, and Prevention of Chronic Obstructive Lung Disease: the  
34  
35 458 GOLD science committee report 2019. *Eur Respir J*. 2019;53(5).
- 36 459 2. Alwan A. Global Status Report on Non-Communicable Diseases. WHO, 2010
- 37  
38 460 3. World Health Organization. Global surveillance, prevention and control of Chronic  
39  
40 461 Respiratory Diseases, Switzerland, 2007; 22-23.
- 41 462 4. Amarasiri L, Fernando A, Gunasekara K, Gunasinghe W, Madegedara D, Wickramasinghe  
42  
43 463 R. The prevalence of Chronic Obstructive Pulmonary Disease in Sri Lanka. *European*  
44  
45 464 *Respiratory Journal*, 2017; 2017(50):1212.
- 46 465 5. World Health Organization. WHO strategy for prevention and control of chronic respiratory  
47  
48 466 diseases, Geneva, 2017.
- 49  
50 467 6. Yasaratne D, Dharmage SC. Letter from Sri Lanka. *Respirology*. 2020;25:339-41.
- 51  
52 468 7. Pinnock H, Kendall M, Murray SA, Worth A, Levack P, Porter M, et al. Living and dying  
53  
54 469 with severe chronic obstructive pulmonary disease: Multi-perspective longitudinal qualitative  
55  
56 470 study. *BMJ*. 2011;342:268.



- 1  
2  
3 471 8. Singh SJ, Halpin DMG, Salvi S, Kirenga BJ, Mortimer K. Comment Exercise and pulmonary  
4 472 rehabilitation for people with chronic lung disease in LMICs : challenges and opportunities.  
5 473 *Lancet Respir* [Internet]. 2019;7(12):1002–4.  
6  
7 474 9. Nici L, Donner C, Wouters E, Zuwallack R, Ambrosino N, Bourbeau J, et al. American  
8 475 Thoracic Society Documents American Thoracic Society / European Respiratory Society  
9 476 Statement on Pulmonary Rehabilitation. *Am J Respir Crit Care Med*. 2006;173(May):1390-  
10 477 413.  
11  
12 478 10. Mccarthy B, Casey D, Devane D, Murphy K, Murphy E, Lacasse Y, et al. Pulmonary  
13 479 rehabilitation for chronic obstructive pulmonary disease (Review). *Cochrane Database Syst*  
14 480 *Rev*. 2015;2015(2).  
15  
16 481 11. Jones AW, Taylor A, Gowler H, Kelly NO, Ghosh S, Bridle C. Systematic review of  
17 482 interventions to improve patient uptake and completion of pulmonary rehabilitation in  
18 483 COPD. *ERJ Open Res*. 2017;3.  
19  
20 484 12. Chan AW, Tetzlaff JM, Altman DG, Laupacis A, Gøtzsche PC, Krleža-Jerić K, et al. Spirit  
21 485 2013 statement: Defining standard protocol items for clinical trials. *Chinese J Evidence-Based*  
22 486 *Med*. 2013;13(12):1501–7.  
23  
24 487 13. Bolton CE, Bevan-Smith EF, Blakey JD, et al. British Thoracic Society guideline on  
25 488 pulmonary rehabilitation in adults: accredited by NICE. *Thorax*. 2013;68:ii1-ii30.  
26  
27 489 14. Ries AL, Bauldoff GS, Casaburi R, Mahler DA, Rochester CL, Herrerias C. Pulmonary  
28 490 Rehabilitation; Joint ACCP/AACVPR Evidence-Based Clinical Practice Guidelines. *Chest*.  
29 491 2007;131(5):4S-42S.  
30  
31 492 15. Blackstock FC, Evans RA. Rehabilitation in lung diseases: ‘Education’ component of  
32 493 pulmonary rehabilitation. *Respirology*. 2019;24(9):863–70  
33  
34 494 16. Spencer LM, McKeough ZJ. Maintaining the benefits following pulmonary rehabilitation:  
35 495 Achievable or not? *Respirology*. 2019;24(9):909–15.  
36  
37 496 17. Armstrong M, Vogiatzis I. Personalized exercise training in chronic lung diseases.  
38 497 *Respirology*. 2019;24(9):854–62.  
39  
40 498 18. Revill SM, Morgan MDL, Singh SJ, Williams J, Hardman AE. The endurance shuttle walk :  
41 499 a new field test for the assessment of endurance capacity in chronic obstructive pulmonary  
42 500 disease. *Thorax*. 1999;54(2):213–22  
43  
44 501 19. Yasuda H, Yamaya M, Nakayama K, Ebihara S, Sasaki T, Okinaga S, et al. Increased  
45  
46  
47  
48  
49  
50  
51  
52  
53  
54  
55  
56  
57  
58  
59  
60



- 1  
2  
3 502 Arterial Carboxyhemoglobin Concentrations in Chronic Obstructive Pulmonary Disease. *Am*  
4 503 *J Respir Crit Care Med.* 2005;171:1246–51.
- 5  
6 504 20. Durkin JVGA, Womersley J. Body fat assessed from total body density and its estimation  
7 505 from skinfold thickness: measurements on 481 men and women aged from 16 to 72 Years. *Br*  
8 506 *J Nutr.* 1974;32:77–96.
- 9  
10 507 21. Doña E, Oliveira C, Palenque FJ, Porras N, Dorado A, Martín-valero R, et al. Body  
11 508 Composition Measurement in Bronchiectasis: Comparison between Bioelectrical Impedance  
12 509 Analysis, Skinfold Thickness Measurement, and Dual-Energy X-ray Absorptiometry before  
13 510 and after Pulmonary Rehabilitation. *J Acad Nutr Diet.* 2018;118(8):1464–73.
- 14  
15 511 22. Lanerolle MD, Lanerolle P, Atukorala S, Silva A De. Enhancing the accuracy of bio  
16 512 impedance analysis in assessing total body water. *Int J Body Compos Res.* 2012;10(1):29–34.
- 17  
18 513 23. Bestall JC, Paul EA, Garrod R, Garnham R, Jones PW, Wedzicha JA. Usefulness of the  
19 514 Medical Research Council (MRC) dyspnoea scale as a measure of disability in patients with  
20 515 chronic obstructive pulmonary disease. *Thorax.* 1999;54:581–6.
- 21  
22 516 24. Herdman M, Gudex C, Lloyd A, Janssen M, Kind P, Parkin D, et al. Development and  
23 517 preliminary testing of the new five-level version of EQ-5D (EQ-5D5L). *Quality of Life*  
24 518 *Research.* 2011;20(10):1727-736.
- 25  
26 519 25. Van der Molen T, Willemse BW, Schokker S, et al. Development, validity and  
27 520 responsiveness of the Clinical COPD Questionnaire. *Health Qual Life Outcomes.* 2003;1:13.
- 28  
29 521 26. Papaioannou M, Pitsiou G, Manika K, Kontou P, Zarogoulidis P, Sichletidis L, Kioumis IP.  
30 522 COPD assessment test: A simple tool to evaluate disease severity and response to treatment.  
31 523 *J of Chronic Obstructive Pulmonary Disease.* 2014;11:489- 95.
- 32  
33 524 27. Reilly MC, Zbrozek IAS, Dukes EM. The Validity and Reproducibility of a Work  
34 525 Productivity and Activity Impairment Instrument. *Pharmacoeconomics.* 1993;4(5):353–65.
- 35  
36 526 28. Zigmond AS, Snaith RP. The hospital anxiety and depression scale. *Acta Psychiatrica*  
37 527 *Scandinavica.* 1983;67(6):361-70.
- 38  
39 528 29. Buysse DJ, Reynolds CF, Monk TH, et al. The Pittsburgh Sleep Quality Index: a new  
40 529 instrument for psychiatric practice and research. *Psychiatry Res.* 1989;28:193–213
- 41  
42 530 30. Weisman IM, Marciniuk D, Martinez FJ, Sciruba F, Sue D, Myers J, et al. American  
43 531 Thoracic Society / American College of Chest Physicians ATS / ACCP Statement on  
44 532 Cardiopulmonary Exercise Testing. *Am J Respir Crit Care Med.* 2003;167:211–77.
- 45  
46  
47  
48  
49  
50  
51  
52  
53  
54  
55  
56  
57  
58  
59  
60

- 1  
2  
3 533 31. Singh SJ, Morgan MD, Scott S, Walters D, Hardman AE. Development of a shuttle walking  
4 534 test of disability in patients with chronic airways obstruction. *Thorax*. 1992;47(12):1019-24.  
5  
6 535 32. Mahler DA, Horowitz MB. Perception of breathlessness during exercise in patients with  
7 536 respiratory disease. *Med Sci Sports Exerc*. 1994;26:1078-1081.  
8  
9 537 33. Borg GA. Psychophysical bases of perceived exertion. *Med Sci Sports Exerc*. 1982;14:377-  
10 538 381  
11  
12 539 34. Jones SE, Kon SSC, Canavan JL, Patel MS, Clark AL, Nolan CM, et al. The five-repetition  
13 540 sit-to-stand test as a functional outcome measure in COPD. *Thorax*. 2013;68:1015-20.  
14  
15 541 35. Booth M: Assessment of physical activity: An International perspective. *Research Quarterly*  
16 542 *for Exercise and Sport*. 2000, 71 (2): 114-120.  
17  
18 543 36. Bassett DR, John D. Use of pedometers and accelerometers in clinical populations: validity  
19 544 and reliability issues. *Phys Ther Rev*. 2010;15:135-42.  
20  
21 545 37. Choi L, Liu Z, Matthews CE, Buchowski MS. Validation of accelerometer wear and nonwear  
22 546 time classification algorithm. *Med Sci Sports Exerc*. 2011;43:357-64.  
23  
24 547 38. Demeyer H, Burtin C, Van Remoortel H, Hornikx M, Langer D, Decramer M, et al.  
25 548 Standardizing the analysis of physical activity in patients with COPD following a pulmonary  
26 549 rehabilitation program. *Chest* 2014 Aug;146(2):318-327  
27  
28 550 39. Troiano RP, Berrigan D, Dodd KW, Mâsse LC, Tilert T, McDowell M. Physical activity in  
29 551 the United States measured by accelerometer. *Med Sci Sports Exerc* 2008 Jan;40(1):181-188.  
30  
31 552 40. Lucas AO, Gilles HM. Approaches to economic evaluation. *Short Textbook of Public Health*  
32 553 *Medicine for the Tropics*. 2002. CRC Press.  
33  
34 554 41. Harris PA, Taylor R, Minor BL, Elliott V, Fernandez M, Neal LO, et al. The REDCap  
35 555 consortium: Building an international community of software platform partners. *J Biomed*  
36 556 *Inform*. 2019;95.  
37  
38 557 42. Braun V, Clarke V. Using thematic analysis in psychology. *Qual Res Psychol*. 2006;3:77-101  
39  
40 558 43. Maguire M, Delahunt B. Doing a Thematic Analysis : A Practical, Step-by-Step Guide for  
41 559 Learning and Teaching Scholars. *AISHE-J*. 2017;8(3):3351-14.  
42  
43  
44  
45  
46  
47  
48  
49  
50  
51  
52  
53  
54  
55  
56  
57  
58  
59  
60

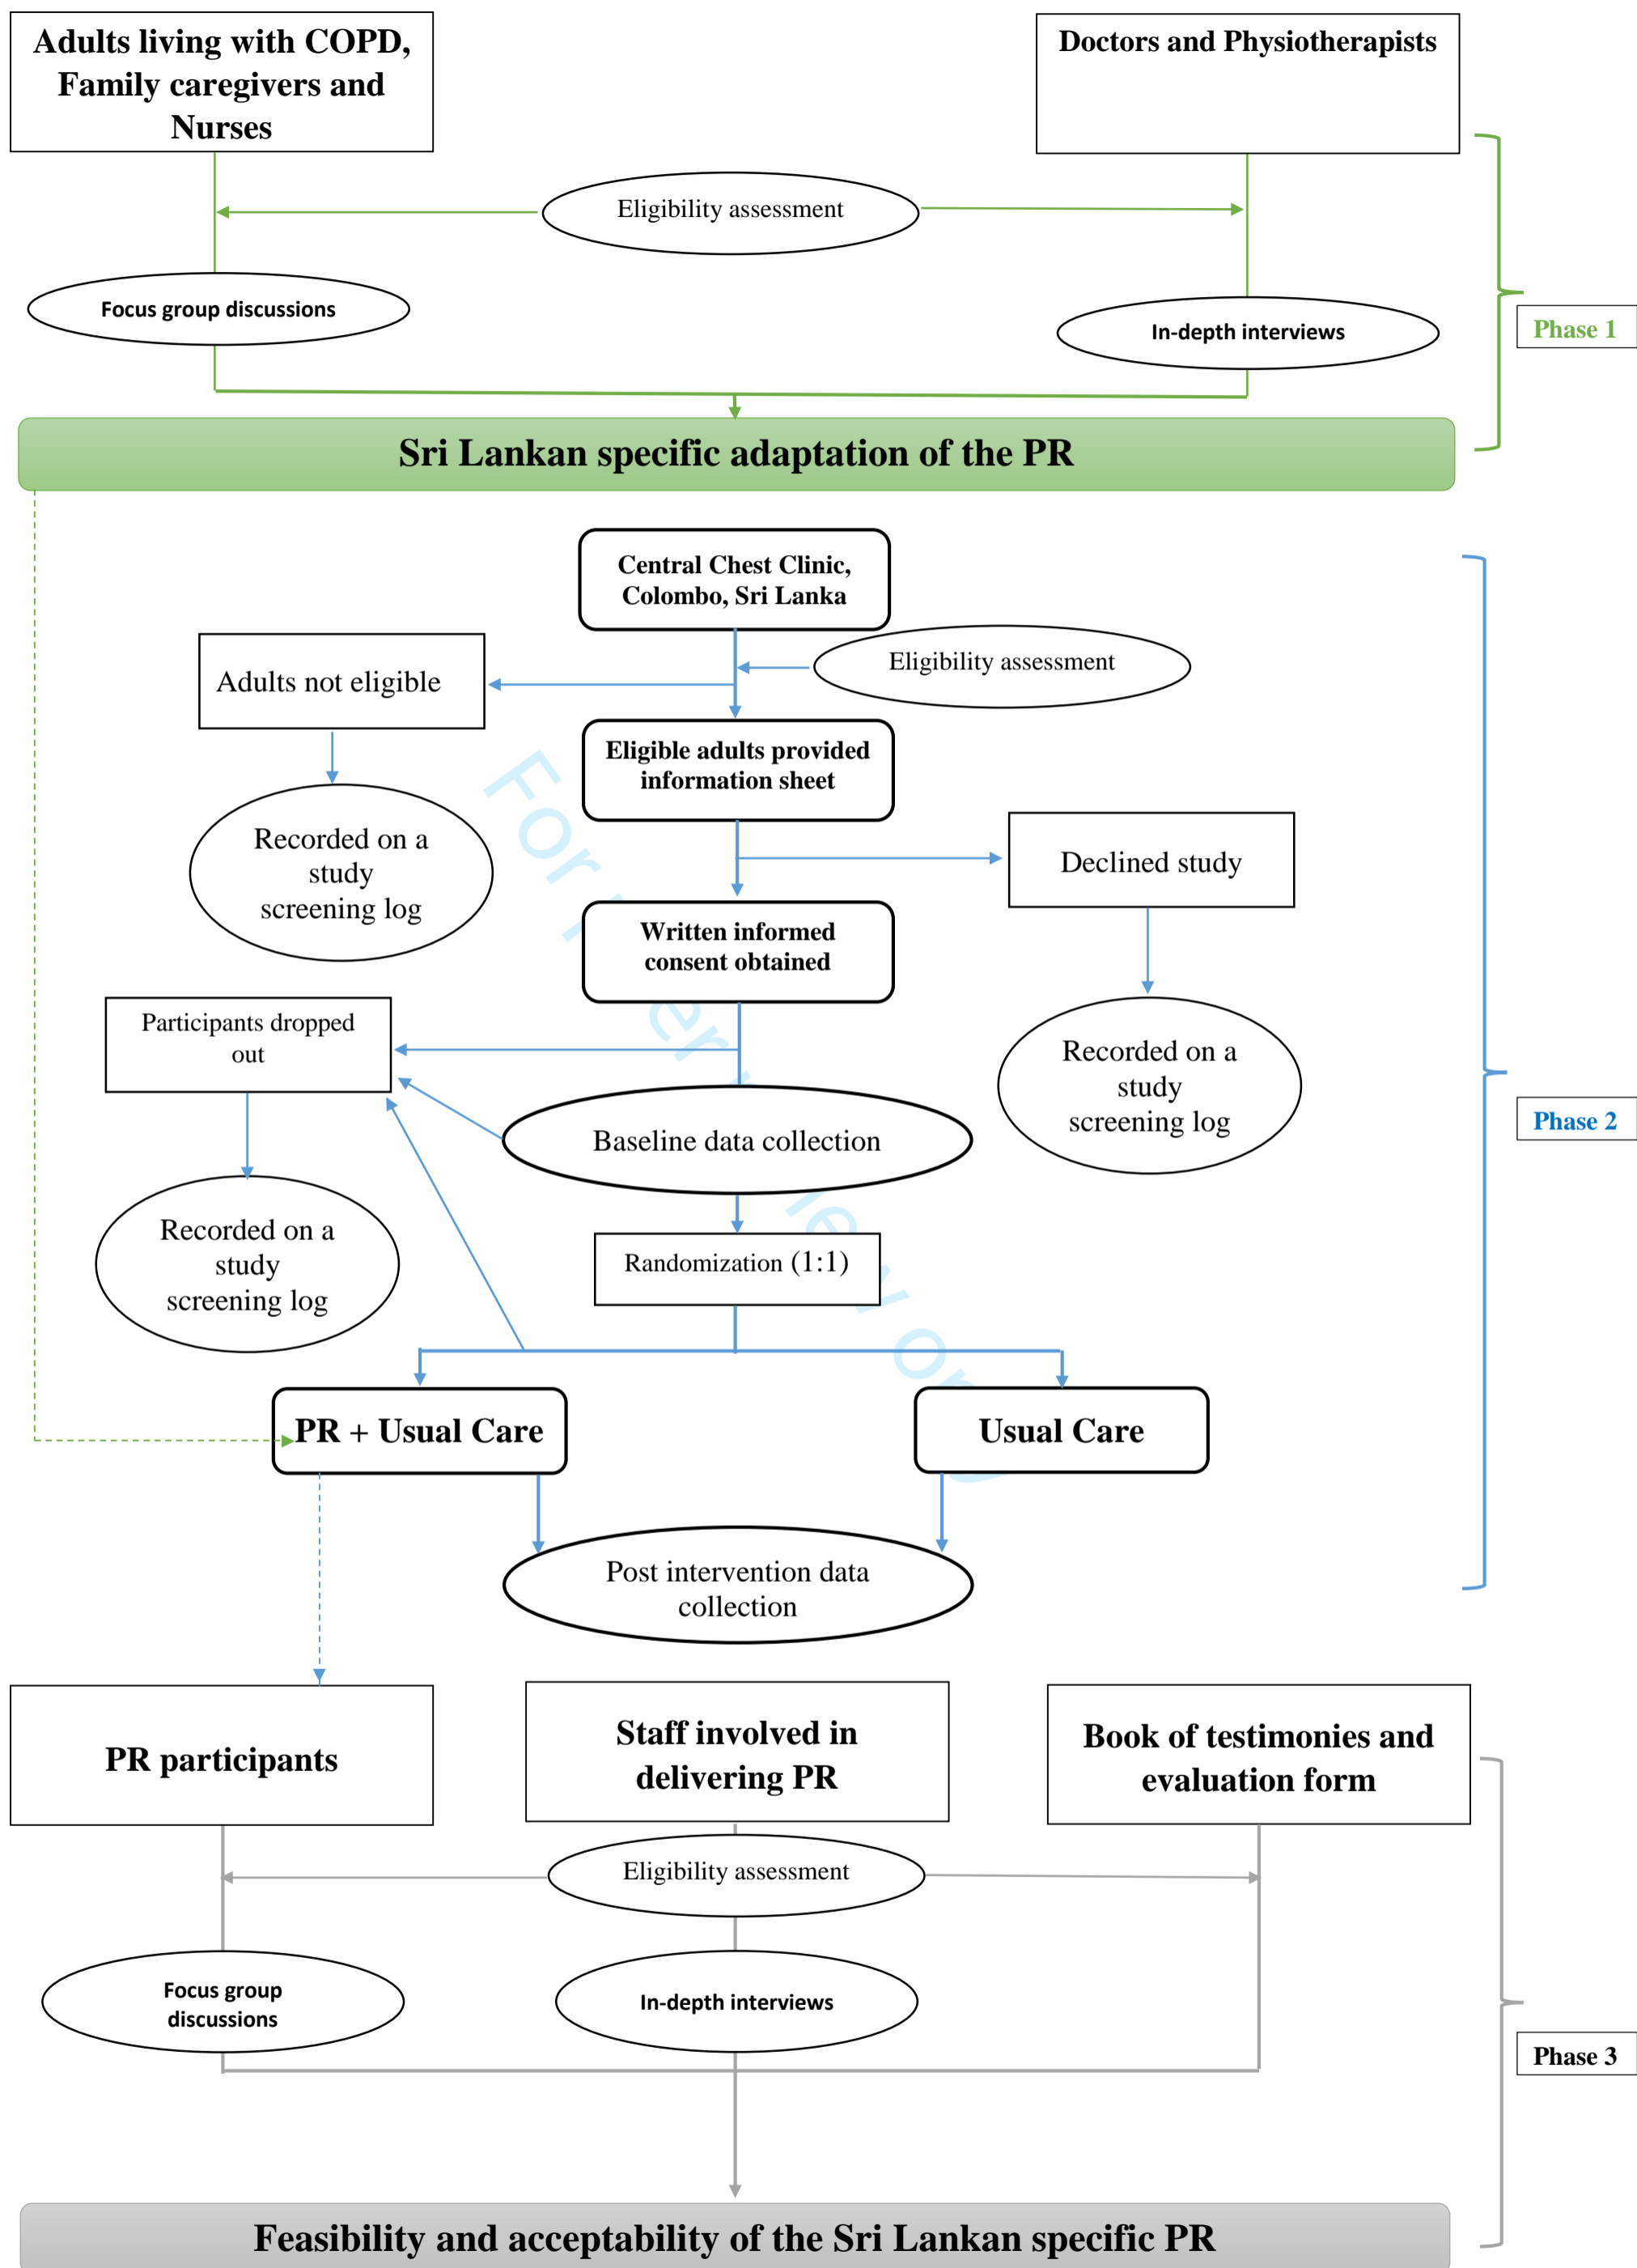

## Appendices

### Information sheet

#### **Cultural adaptation of Pulmonary Rehabilitation and subsequent testing in a Randomised Controlled Feasibility Trial for Adults with Chronic Obstructive Pulmonary Disease in Sri Lanka**

I am Prof. S. W. Wimalasekera, of Department of Physiology, Faculty of Medical Sciences, University of Sri Jayewardenepura. I and my team of health care personnel are, conducting a research on “Testing the Feasibility and Acceptability of a Culturally Appropriate Hospital-Based Pulmonary Rehabilitation (PR) Programme for Adults with Chronic Obstructive Pulmonary Disease in Sri Lanka”. I invite you to participate in the study. Please take time and read the following information carefully before giving your consent. You are free to ask questions to clarify facts which are not clear or ask for more information if you need.

#### **Purpose of the study**

The purpose of this study is to devise an appropriate PR programme and then determine the feasibility and acceptability of this programme for adults living with COPD in Sri Lanka and assess the potential for a future trial of its effectiveness.

#### **When you participate you will be required to do the following**

You will be requested to participate several components of the study.

You will participate in a group discussion conducted in a quiet room in the clinic (conference hall) with very minimal disturbances. At the beginning of the discussion you will answer some questions regards your personal information, (age, gender, history of the disease condition). Then the interviewer will ask some questions regarding your thoughts and ideas about pulmonary rehabilitation. You and your group members can freely comment on the questions or can add your ideas to the discussion. The interview takes around forty-five minutes of time.

You will also participate in a feasibility trial which you will be allocated to one of the two groups. One group will receive usual care and PR and the other group will receive only usual care which consists of pharmacological treatment and brief information about disease condition, medication and inhaler techniques. PR is typically a 6-week rolling programme and consisting of 12 sessions in total, delivered twice a week. Sessions usually last approximately two hours, with one hour for exercise training and one hour for education. Some routine and specific test and measurements will be taken before and after the intervention will describe any changes in the health of the adults living with COPD.

If you are allocated to the group who receive the PR, you will be asked to share your experiences regarding the PR and subjected modification and opinions on pulmonary rehabilitation.

In order to maintain accuracy, and to keep records, your discussion will be recorded by the research team members with your permission. Your participation in the project will remain confidential and the provision of your name and address is necessary for us to maintain records. Any personal information gathered during the study will not be disclosed to a third party. Your responses to the questions and will

1  
2  
3 only be used for the purpose of this project. You can be assured that you will remain anonymous if you  
4 take part in the project. Your participation in this project is entirely voluntary. You are not obliged to take  
5 part. If you do not wish to take part, you can withdraw without giving a reason and your medical care will  
6 not be affected, further you will not be contacted again. Similarly, if you do agree to participate, you are  
7 free to withdraw at any time during the project.  
8  
9  
10

### 11 **What are the possible benefits of taking part?**

12  
13 By participating in the study, you will contribute to develop a PR programme which helps to improve the  
14 quality of life of the adults living with COPD. As well as you will contribute to determine the feasibility  
15 and acceptability of this programme within the health care system in Sri Lanka.  
16  
17  
18

### 19 **What are the possible disadvantages and risks of taking part?**

20  
21 You will be undertaking some physical tests as part of the research. Therefore, there may be a very small  
22 risk of falls, breathlessness, changes in blood pressure and changes in heart rate. However, these risks are  
23 very rare, and trained staff and emergency equipment will be available to deal with any serious events.  
24 Participants who experience any such event will be directed to the appropriate hospital and all the  
25 necessary care will be ensured and followed-up until the participant has resolved or stabilized.  
26  
27  
28

### 29 **What will happen if you don't carry on with the study?**

30  
31 If you withdraw from the study all the information and data collected from you, to date, will be destroyed  
32 and your name would be removed from all the research study files. There will not be any loss or impact  
33 on your routine medical care which you are entitled to.  
34  
35  
36

### 37 **What will happen to the results of the research study?**

38  
39 The results of all the participants of the study will be used for scientific research. All data will be  
40 available only to the researchers and information provided will be strictly confidential. Your participation  
41 in the study is highly appreciated. Privacy and confidentiality of data gathered is completely secure and  
42 will be used only for research purposes. If you have any questions or any concerns with regards to the  
43 study and need further information you can call the telephone number listed below. Further you can send  
44 any complaint to the above postal address or email address.  
45  
46  
47

48 Yours faithfully

49 Prof. S.W. Wimalasekera

50 Department of Physiology, Faculty of Medical Sciences, University of Sri Jayewardenepura

51 T.P No. 0777487203 e-mail : [savithriww@yahoo.com](mailto:savithriww@yahoo.com)

52 Ethics Review Committee – University of Sri Jayewardenepura - +94 11 2758000 Ext 4075e  
53  
54  
55  
56  
57  
58  
59  
60

**Consent Form: Randomised Controlled Feasibility Trial**

**Cultural adaptation of Pulmonary Rehabilitation and subsequent testing in a Randomised Controlled Feasibility Trial for Adults with Chronic Obstructive Pulmonary Disease in Sri Lanka**

- 1. Have you read the information sheet? (please keep a copy for yourself) YES/NO
- 2. Have you had an opportunity to discuss this and ask any questions? YES/NO
- 3. Have you had satisfactory answers to all your questions? YES/NO
- 4. Have you received enough information about the study? YES/NO
- 5. Who explained the study to you-----
- 6. Do you understand that you are free to withdraw from the study at any time,  
without having to give a reason YES/NO
- 7. All personal details will be treated as STRICTLY CONFIDENTIAL.  
Do you give your permission for these individuals to have access to the records? YES/NO
- 8. Have you had sufficient time to come to your decision? YES/NO
- 9. Do you agree to take part in this study? YES/NO

Participant’s signature ----- Date-----

**By the Witness**

I have been present while the procedure was explained to the participant and I have witness his/ her willingness to take part in the study.

Signature of witness----- Date-----

(The witness should be a person not connected to the study)

Name -----

Contact details-----

# BMJ Open

## Protocol for the Cultural Adaptation of Pulmonary Rehabilitation and Subsequent Testing in a Randomised Controlled Feasibility Trial for Adults with Chronic Obstructive Pulmonary Disease in Sri Lanka

|                               |                                                                                                                                                                                                                                                                                                                                                                                                                                                                                                                                                                                                                                                                                                                                                                                                                                                                                                                                                                                                                                                                                                                                                                                                                                                                                                                                                                                                                                                                                                                                                                                                                                                                                                                                                                                                                                                                                                                                                                                                                                                                                                                                                      |
|-------------------------------|------------------------------------------------------------------------------------------------------------------------------------------------------------------------------------------------------------------------------------------------------------------------------------------------------------------------------------------------------------------------------------------------------------------------------------------------------------------------------------------------------------------------------------------------------------------------------------------------------------------------------------------------------------------------------------------------------------------------------------------------------------------------------------------------------------------------------------------------------------------------------------------------------------------------------------------------------------------------------------------------------------------------------------------------------------------------------------------------------------------------------------------------------------------------------------------------------------------------------------------------------------------------------------------------------------------------------------------------------------------------------------------------------------------------------------------------------------------------------------------------------------------------------------------------------------------------------------------------------------------------------------------------------------------------------------------------------------------------------------------------------------------------------------------------------------------------------------------------------------------------------------------------------------------------------------------------------------------------------------------------------------------------------------------------------------------------------------------------------------------------------------------------------|
| Journal:                      | <i>BMJ Open</i>                                                                                                                                                                                                                                                                                                                                                                                                                                                                                                                                                                                                                                                                                                                                                                                                                                                                                                                                                                                                                                                                                                                                                                                                                                                                                                                                                                                                                                                                                                                                                                                                                                                                                                                                                                                                                                                                                                                                                                                                                                                                                                                                      |
| Manuscript ID                 | bmjopen-2020-041677.R2                                                                                                                                                                                                                                                                                                                                                                                                                                                                                                                                                                                                                                                                                                                                                                                                                                                                                                                                                                                                                                                                                                                                                                                                                                                                                                                                                                                                                                                                                                                                                                                                                                                                                                                                                                                                                                                                                                                                                                                                                                                                                                                               |
| Article Type:                 | Protocol                                                                                                                                                                                                                                                                                                                                                                                                                                                                                                                                                                                                                                                                                                                                                                                                                                                                                                                                                                                                                                                                                                                                                                                                                                                                                                                                                                                                                                                                                                                                                                                                                                                                                                                                                                                                                                                                                                                                                                                                                                                                                                                                             |
| Date Submitted by the Author: | 05-Nov-2020                                                                                                                                                                                                                                                                                                                                                                                                                                                                                                                                                                                                                                                                                                                                                                                                                                                                                                                                                                                                                                                                                                                                                                                                                                                                                                                                                                                                                                                                                                                                                                                                                                                                                                                                                                                                                                                                                                                                                                                                                                                                                                                                          |
| Complete List of Authors:     | <p>Jayamaha, Akila; KIU, Health Sciences<br/> Perera, Chamilya; KIU, Health Sciences<br/> Orme, Mark; University Hospitals of Leicester NHS Trust, Centre for Exercise and Rehabilitation Science, NIHR Leicester Biomedical Research Centre-Respiratory; University of Leicester, Department of Respiratory Sciences<br/> Jones , Amy; University Hospitals of Leicester NHS Trust, Centre for Exercise and Rehabilitation Science, NIHR Leicester Biomedical Research Centre-Respiratory; University of Leicester, Department of Respiratory Sciences<br/> Wijayasiri, Upendra; Colombo South Teaching Hospital, Sports Medicine Unit<br/> Amarasekara, Thamara; University of Sri Jayewardenepura, Faculty of Allied Health Sciences<br/> Karunatilake, Ravini ; National Hospital of Sri Lanka, Central Chest Clinic<br/> Fernando, Amitha; National Hospital of Sri Lanka, Central Chest Clinic<br/> Seneviratne, Anthony ; Primary Care Respiratory Group<br/> Barton, Andy; University of Plymouth, Faculty of Health<br/> Jones, Rupert; University of Plymouth, Faculty of Health<br/> Yusuf, Zainab; Centre for Exercise and Rehabilitation Science, NIHR Leicester Biomedical Research Centre-Respiratory, University Hospitals of Leicester NHS Trust; University of Leicester, Department of Respiratory Sciences<br/> Miah, Ruhme ; University of Leicester, Department of Respiratory Sciences; University Hospitals of Leicester NHS Trust, Centre for Exercise and Rehabilitation Science, NIHR Leicester Biomedical Research Centre-Respiratory<br/> Malcolm, Dominic; Loughborough University, School of Sport, Exercise and Health Sciences<br/> Matheson, Jesse; University of Sheffield, Department of Economics<br/> Free, Robert; University of Leicester, Department of Respiratory Sciences,<br/> Manise, Adrian ; University of Leicester, Department of Respiratory Sciences<br/> Steiner, michael ; University of Leicester, Department of Respiratory Sciences; University Hospitals of Leicester NHS Trust, Centre for Exercise and Rehabilitation Science, NIHR Leicester Biomedical Research Centre-Respiratory</p> |



|                                    |                                                                                                                                                                                                                                                                                                                         |
|------------------------------------|-------------------------------------------------------------------------------------------------------------------------------------------------------------------------------------------------------------------------------------------------------------------------------------------------------------------------|
|                                    | Wimalasekera, Savithri; University of Sri Jayewardenepura, Faculty of Medical Sciences<br>Singh, Sally; University of Leicester, Department of Respiratory Sciences; University Hospitals of Leicester NHS Trust, Centre for Exercise and Rehabilitation Science, NIHR Leicester Biomedical Research Centre-Respiratory |
| <b>Primary Subject Heading</b> :   | Respiratory medicine                                                                                                                                                                                                                                                                                                    |
| <b>Secondary Subject Heading</b> : | Rehabilitation medicine                                                                                                                                                                                                                                                                                                 |
| <b>Keywords</b> :                  | REHABILITATION MEDICINE, Chronic airways disease < THORACIC MEDICINE, Emphysema < THORACIC MEDICINE, Protocols & guidelines < HEALTH SERVICES ADMINISTRATION & MANAGEMENT                                                                                                                                               |
|                                    |                                                                                                                                                                                                                                                                                                                         |

SCHOLARONE™  
Manuscripts



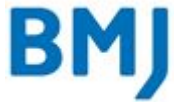

I, the Submitting Author has the right to grant and does grant on behalf of all authors of the Work (as defined in the below author licence), an exclusive licence and/or a non-exclusive licence for contributions from authors who are: i) UK Crown employees; ii) where BMJ has agreed a CC-BY licence shall apply, and/or iii) in accordance with the terms applicable for US Federal Government officers or employees acting as part of their official duties; on a worldwide, perpetual, irrevocable, royalty-free basis to BMJ Publishing Group Ltd ("BMJ") its licensees and where the relevant Journal is co-owned by BMJ to the co-owners of the Journal, to publish the Work in this journal and any other BMJ products and to exploit all rights, as set out in our [licence](#).

The Submitting Author accepts and understands that any supply made under these terms is made by BMJ to the Submitting Author unless you are acting as an employee on behalf of your employer or a postgraduate student of an affiliated institution which is paying any applicable article publishing charge ("APC") for Open Access articles. Where the Submitting Author wishes to make the Work available on an Open Access basis (and intends to pay the relevant APC), the terms of reuse of such Open Access shall be governed by a Creative Commons licence – details of these licences and which [Creative Commons](#) licence will apply to this Work are set out in our licence referred to above.

Other than as permitted in any relevant BMJ Author's Self Archiving Policies, I confirm this Work has not been accepted for publication elsewhere, is not being considered for publication elsewhere and does not duplicate material already published. I confirm all authors consent to publication of this Work and authorise the granting of this licence.

1  
2  
3  
4 1 **Protocol for the Cultural Adaptation of Pulmonary Rehabilitation and Subsequent Testing**  
5  
6 2 **in a Randomised Controlled Feasibility Trial for Adults with Chronic Obstructive**  
7  
8 3 **Pulmonary Disease in Sri Lanka**  
9

10 4 Akila R Jayamaha <sup>1</sup>, Chamilya H Perera <sup>1</sup>, Mark W Orme <sup>2,3</sup>, Amy V Jones <sup>2,3</sup>, Upendra K D C Wijayasiri  
11 5 <sup>4</sup>, Thamara D Amarasekara <sup>5</sup>, Ravini de S Karunatillake <sup>6</sup>, Amitha C Fernando <sup>6</sup>, Seneviratne A L P De  
12 6 S.<sup>7</sup>, Andy Barton <sup>8</sup>, Rupert Jones <sup>8</sup>, Zainab K Yusuf <sup>2,3</sup>, Ruhme B Miah <sup>2,3</sup>, Dominic Malcolm <sup>9</sup>, Jesse A  
13 7 Matheson <sup>10</sup>, Robert C Free <sup>3</sup>, Adrian Manise <sup>3</sup>, Michael C Steiner <sup>2,3</sup> Savithri W Wimalasekera <sup>11</sup>, Sally J  
14 8 Singh <sup>2,3</sup>  
15 9

16 10 Correspondence to Akila Randika Jayamaha/1226arj@gmail.com/akila@kiu.ac.lk  
17

18 11 **Abstract**  
19

20  
21 12 **Introduction** International guidelines recommend pulmonary rehabilitation (PR) should be  
22  
23 13 offered to adults living with COPD, but PR availability is limited in Sri Lanka. Culturally  
24  
25 14 appropriate PR needs to be designed and implemented in Sri Lanka. The study aims to adapt PR  
26  
27 15 to the Sri Lankan context and determine the feasibility of conducting a future trial of the adapted  
28  
29 16 PR in Sri Lanka.

30  
31 17 **Methods and analysis** Eligible participants will be identified and will be invited to take part in  
32  
33 18 the randomised controlled feasibility trial, which will be conducted in Central Chest Clinic,  
34  
35 19 Colombo, Sri Lanka. A total of 50 participants will be recruited (anticipated from April 2021) to  
36  
37 20 the trial and randomised (1:1) into one of two groups; control group receiving usual care or the  
38  
39 21 intervention group receiving adapted PR. The trial intervention is a Sri Lankan specific PR  
40  
41 22 programme, which will consist of 12 sessions of exercise and health education, delivered over 6  
42  
43 23 weeks. Focus groups with adults living with COPD, caregivers and nurses and in-depth  
44  
45 24 interviews with doctors and physiotherapist will be conducted to inform the Sri Lankan specific  
46  
47 25 PR adaptations. After completion of PR, routine measures in both groups will be assessed by a  
48  
49 26 blinded assessor. The primary outcome measure is feasibility, including assessing eligibility,  
50  
51 27 uptake and completion. Qualitative evaluation of the trial using focus groups with participants  
52  
53 28 and in-depth interviews with PR deliverers will be conducted to further determine feasibility and  
54  
55 29 acceptability of PR, as well as the ability to run a larger future trial.

56 30 **Ethics and dissemination** Ethical approval was obtained from the ethics review committee of  
57  
58 31 Faculty of Medical Sciences, University of Sri Jayewardenepura, Sri Lanka and University of  
59

1  
2  
3 32 Leicester, UK. The results of the trial will be disseminated through patient and public  
4  
5 33 involvement events, local and international conference proceedings, and peer-reviewed journals.  
6

7  
8 34 Trial registration: ISRCTN13367735  
9

10 35 **Keywords:** COPD, Pulmonary Rehabilitation, Exercise, Education, Sri Lanka  
11  
12 36  
13 37

### 14 38 **Strengths and limitations**

- 15 39
- 16 40 • This study is the first examining the feasibility and acceptability of a culturally  
17 appropriate pulmonary rehabilitation programme for adults with COPD in Sri Lanka.
  - 18 41 • Taking a mixed-method approach, this study will provide a rich insight into delivering a  
19 trial of pulmonary rehabilitation in the Sri Lankan context.
  - 20 42 • This study is a single center feasibility trial. As such, whilst findings will be an important  
21 first step in understanding the potential role of pulmonary rehabilitation in Sri Lanka and  
22 low- and middle-income countries more broadly, findings may not be generalizable to  
23 other regions of the world.  
24 44  
25 45  
26 46  
27  
28  
29  
30  
31  
32  
33  
34  
35  
36  
37  
38  
39  
40  
41  
42  
43  
44  
45  
46

## 47 INTRODUCTION

48 Chronic obstructive pulmonary disease (COPD) is a progressive disease characterised by airflow  
49 obstruction and breathlessness. COPD is a major cause of morbidity and mortality throughout the  
50 world, corresponding to 6% of all deaths worldwide.<sup>1</sup> Further, more than 90% of COPD deaths  
51 occur in low and middle-income countries.<sup>2</sup> The most recent estimate of COPD prevalence in  
52 South Asia was 6.3%<sup>3</sup> with a prevalence in Sri Lanka of 10.5%,<sup>4</sup> similar to the estimated global  
53 COPD prevalence of 11.7%.<sup>5</sup> COPD is a significant burden to both patients and healthcare  
54 services.<sup>6</sup>

55 Chronic cough with sputum, breathlessness, physical inactivity and exercise intolerance resulting  
56 from dyspnoea or fatigue are common consequences of COPD.<sup>1</sup> Symptoms of COPD  
57 progressively worsen and people can become breathless, even at rest. Daily activities often  
58 become difficult as the condition worsens, impacting their quality of life.<sup>7</sup> The impact of COPD  
59 to the individual and to society makes the need for interventions to reverse the associated  
60 disability of paramount importance.

61 International guidelines recommend that pulmonary rehabilitation (PR) should be routinely  
62 offered to patients with chronic respiratory disease who have persistent symptoms, limited  
63 activity, and/or are unable to adjust to illness.<sup>8,9</sup> It is a low cost, high impact intervention that  
64 improves the quality of life, reduces suffering, reduces mortality and reduces economic loss,  
65 relieves dyspnoea and fatigue, improves exercise capacity, improves psychological and  
66 emotional function, and enhances an individual's self-management of their condition.<sup>1</sup> Having  
67 realised the benefits of PR in COPD, Western countries have incorporated this as an important  
68 structural component of healthcare delivery services.<sup>10</sup> Implementation of PR based as practiced  
69 in Western countries, in Sri Lanka requires adaptation to the local health service, population and  
70 culture. Despite its effectiveness, there is a significant need to understand the feasibility of  
71 conducting PR in low resource Sri Lankan health care setting and the acceptability of PR among  
72 Sri Lankan adults living with COPD and healthcare staff involved in its delivery. Uptake and  
73 completion of PR even in Western countries is an on-going challenge.<sup>11</sup> The need to maximize  
74 appeal of PR to patients and referrers is a global issue and one that is likely to be specific to a  
75 given location and population. There remains an unmet need for PR in Sri Lanka. To be

1  
2  
3 76 successful, PR must be not only evidence-based, but also designed and implemented in a manner  
4  
5 77 sensitive to the context in which it is being delivered, such as culture and geography. Therefore,  
6  
7 78 the aim of this study is to devise an appropriate PR programme and then determine the feasibility  
8  
9 79 and acceptability of this programme for adults living with COPD in Sri Lanka and assess the  
10  
11 80 potential for a future trial of its effectiveness.

12  
13 81 The objectives of the study are to:

- 14  
15 82 1. Explore the needs and perceptions of adults living with COPD, their care-givers /family  
16  
17 83 members and health care professionals to inform the adaptations required for a PR programme  
18  
19 84 suitable for the Sri Lankan context.  
20  
21  
22 85 2. Determine the feasibility of conducting adapted hospital-based PR for people living with  
23  
24 86 COPD.  
25  
26  
27 87 3. Assess the acceptability of the PR among Sri Lankan adults living with COPD and healthcare  
28  
29 88 staff involved in its delivery.  
30  
31  
32 89 4. Describe any changes in health of the adults living with COPD following completion of PR.  
33  
34 90 5. Assess the feasibility of a future trial and estimate the required sample size.  
35  
36  
37  
38  
39

## 92 **METHODS AND ANALYSIS**

### 93 **Study design and registration**

40  
41 94 The proposed study will be conducted in three phases. Phase 1: A qualitative study will be  
42  
43 95 conducted to inform the adaptations required to make PR specific to the Sri Lankan context.  
44  
45 96 Phase 2 is a single blind randomised control feasibility trial. Adults living with COPD will be  
46  
47 97 randomised (1:1) into adapted PR or usual care. Phase 3: Qualitative evaluation of the trial to  
48  
49 98 determine the feasibility and acceptability of PR deliverers and participants. The trial will be  
50  
51 99 conducted, analysed and reported according to the Standard Protocol Items: Recommendations  
52  
53 100 for Interventional Trials (SPIRIT) statement <sup>12</sup> and trial has been registered on the ISRCTN  
54  
55 101 website. Study was commenced upon ethical approval on 24/07/2020 for Phase 1 of the study.  
56  
57 102 The design of the study and flow of participant enrolment is presented in figure 1.

### 103 **Study setting**

104 The study will be carried out at the Central Chest Clinic, Colombo, Sri Lanka which is a leading  
105 health care facility that provides treatment for adults with respiratory disease. A room allowing  
106 confidential discussions will be used for conducting focus group discussions among adults living  
107 with COPD, their caregivers /family members, and nurses. Semi structured interviews will be  
108 conducted among doctors and physiotherapists in a given quiet room at the Central Chest Clinic  
109 as convenient to them and without interfering with their routine work. The venue for PR will be a  
110 large room at the Central Chest Clinic.

### 111 **Participants**

112 Key informants and suitable participants for phase 1 of the study will be identified by the  
113 researchers with the help of health care professionals involved in the treatment of COPD at  
114 Central Chest Clinic. Suitable participants will be purposively selected and informed verbally  
115 about the study by the researchers. After receiving a study information sheet, potential  
116 participants will be contacted to arrange an appointment, if they wish to take part. An  
117 opportunity to ask questions will be provided. If willing to take part in the study, they will be  
118 asked to provide written informed consent. Multi-religious and multi-ethnic Sri Lankan cultural  
119 diversity and gender will be considered when recruiting to the study. Adults living with COPD  
120 aged  $\geq 18$  years and Medical Research Council (MRC) dyspnoea score grade 2 or higher, Family  
121 member aged  $\geq 18$  years and looks after a patient with COPD and Health care professionals who  
122 have more than 1-year experience of managing patients with COPD and working in the  
123 government health care system of the country will be eligible to participate in the phase 1 of the  
124 study. Participants who provide written informed consent will be enrolled in the study.

125 After the adaptation of PR in phase 1, suitable participants for the Phase 2 randomised controlled  
126 feasibility trial will be identified by the Medical Officers in the Chest Clinic and will be invited  
127 to take part in an eligibility assessment. This assessment will determine eligibility for entry into  
128 the study. People eligible for inclusion in the trial will be: aged  $\geq 18$  years, will have a clinically  
129 confirmed diagnosis of COPD by a physician, confirmed COPD with spirometry based on  
130 GOLD criteria with  $FEV_1/FVC < 0.7$ , and  $FEV_1 < 80\%$  predicted,  $\geq 1$  exacerbation required a  
131 hospitalisation in the year preceding study, mMRC grade  $\geq 2$  and willing to provide informed  
132 consent. Adults with comorbidities such as severe or unstable cardiovascular, other internal

1  
2  
3 133 diseases and locomotor difficulties that preclude the exercise or malignant disease or other  
4  
5 134 serious illness which will interfere with participation in the PR, will be excluded from the study.  
6  
7 135 Individuals not eligible for the study will be recorded on a study screening log.

8  
9 136 [insert figure 1 here]

10  
11 137

## 12 13 14 138 **Procedure**

15  
16  
17 139 Eligible participants will be informed verbally about the study by the Medical Officers of the  
18  
19 140 Central Chest Clinic. After receiving a study information sheet, potential participants will be  
20  
21 141 contacted to arrange an appointment, if they wish to take part. An opportunity to ask questions  
22  
23 142 will be provided. If willing to take part in the study, they will be asked to provide written  
24  
25 143 informed consent. Information regarding the interest of participation in the study will be taken as  
26  
27 144 field notes. Baseline outcome measures will be assessed. After baseline data collection,  
28  
29 145 participants will be randomised (1:1) into two groups. One group will receive usual care and PR  
30  
31 146 and the other group will receive only usual care which consists of pharmacological treatment and  
32  
33 147 brief information about disease condition, medication and inhaler techniques. Experiences of the  
34  
35 148 participants and PR deliverers regarding the acceptability and feasibility of PR will be explored  
36  
37 149 in interviews and focus groups during Phase 3 of the study. Participants who did not complete  
38  
39 150 the PR will be asked to take part in a drop-out interview and information provided freely by the  
40  
41 151 participants will be collected as field notes.

42  
43 152

## 44 153 **Trial interventions**

### 45 154 **Intervention: Adapted pulmonary rehabilitation**

46  
47 155 Sri-Lankan specific PR will comprise the core elements of an evidence based rehabilitation, a  
48  
49 156 programme of exercises <sup>13, 14</sup> and health education. <sup>13, 14, 15</sup> The detail of delivery and adaptations  
50  
51 157 of PR will be informed by findings of the Phase 1 of the study. PR is typically a 6-week rolling  
52  
53 158 programme that consists of 12 sessions in total. <sup>13, 14</sup> Sessions usually last approximately two  
54  
55 159 hours, with one hour for exercise training and one hour for education. All the education sessions  
56  
57 160 and the instructions during PR will be provided in Sinhala language as convenient to the  
58  
59 161 participants. The duration of the PR trial and frequency and duration of sessions will be



1  
2  
3 162 discussed during Phase 1. All staff delivering PR will be trained and assisted by a nursing  
4 163 officer, a clinical nutritionist, an exercise physician and a physiotherapist. The venue for PR will  
5 164 be at the Central Chest Clinic, Colombo, Sri Lanka. The Central Chest Clinic will have a  
6 165 maximum capacity of 10 patients per PR class. The equipment required will be simple and  
7 166 include chairs, weights, and simple exercise equipment based on local availability, suitability and  
8 167 informed by qualitative work.<sup>16</sup>  
9  
10  
11  
12  
13  
14

15 169 In keeping with evidence-based guidelines<sup>13, 14</sup>, discussions in Phase 1 will include the core  
16 170 exercise component of PR, notably resistance training (e.g. upper and lower limbs) and aerobic  
17 171 training (walking, sit-to-stand, step-ups) using minimal equipment and education. Each  
18 172 participant's exercise regimen will be individually prescribed and progressed<sup>17</sup> with walking  
19 173 speed will be prescribed using the ISWT.<sup>18</sup> The process in which this is achieved by patients will  
20 174 be informed by Phase 1. The education component will be delivered by an interdisciplinary team  
21 175 and will be informed by qualitative findings from Phase 1 with discussions facilitated by usual  
22 176 education topics as described in guidelines.<sup>13, 14</sup>  
23  
24  
25  
26  
27  
28  
29

### 30 177 **Usual care**

31  
32 178 Usual care will consist of pharmacological treatment and optimization, prescribed to patients  
33 179 after consultation with Medical Officers at the Central Chest Clinic. Brief information about  
34 180 disease condition, medication and inhaler techniques will be provided by Medical Officers and  
35 181 Nurses. Pulmonary rehabilitation or any form of exercise recommendation is not part of usual  
36 182 care.  
37  
38  
39  
40  
41

### 42 183 **Outcomes**

#### 43 44 45 184 **Primary outcome**

46  
47 185 The primary outcome of the trial will be the feasibility and the acceptability of the PR  
48 186 intervention.  
49  
50  
51

#### 52 187 **Feasibility**

53  
54  
55  
56  
57  
58  
59  
60



188 Measures to assess feasibility are provided in table 1 and include the comprehensive assessment  
 189 of the feasibility of patient recruitment and the intervention delivery.

**Table 1: Primary outcome measures- Feasibility and operational experience assessment**

| <b>Feasibility of patient recruitment</b>                                                                                                                                                                                                    | <b>Data sources</b>                                                                                     |
|----------------------------------------------------------------------------------------------------------------------------------------------------------------------------------------------------------------------------------------------|---------------------------------------------------------------------------------------------------------|
| Feasibility of screening and recruiting participants                                                                                                                                                                                         | Interviews with the healthcare professionals, screening log                                             |
| Suitability of the inclusion criteria                                                                                                                                                                                                        | Interviews with the healthcare professionals, screening log                                             |
| Number of eligible patients, number of patients screened, number of patients invited to take part, actual number of participants who consent to take part                                                                                    | Screening log                                                                                           |
| Number of patients who refuse, drop out and the reasons for refuse and drop out                                                                                                                                                              | Interviews with the patients, screening log                                                             |
| <b>Operational experience of intervention delivery</b>                                                                                                                                                                                       |                                                                                                         |
| Service provider and multi-disciplinary teams' willingness and ability to deliver the PR                                                                                                                                                     | Interviews with healthcare professionals                                                                |
| The practicality of delivering the intervention in the proposed setting                                                                                                                                                                      | Interviews with healthcare professionals and focus groups with participants                             |
| The time needed to collect the data<br>Baseline visit- Time taken for each measure (each individual questionnaire and physical measure)<br>Follow-up visit- Time taken for each measure (each individual questionnaire and physical measure) | Interviews with the healthcare professionals, Rehabilitation records                                    |
| Data completeness and accuracy                                                                                                                                                                                                               | Interviews with the healthcare professionals, Rehabilitation records, RedCap                            |
| Adherence to home exercise                                                                                                                                                                                                                   | Interviews with the patients and self-report exercise diary                                             |
| The training and resources needed to deliver the intervention (ensuring readiness for a future much larger multi-center trial)                                                                                                               | Interviews with the healthcare professionals and focus groups with participants, Rehabilitation records |
| Description of unintended events                                                                                                                                                                                                             | Adverse events log, REDCap                                                                              |

## 190 Acceptability

191 The acceptability of the PR intervention among adults living with COPD and healthcare staff  
 192 involved in its delivery will be assessed. Participants' experience of the PR, including any  
 193 perceived benefits, challenges and changes they would make to the programme, will be explored  
 194 in qualitative interviews and focus groups after their discharge assessment or withdrawal. The  
 195 experience of healthcare professionals regarding the PR intervention, such as their confidence in  
 196 delivering the programme, the components of PR, structure of PR, the patient adherence to the

197 PR exercises and how their perceptions changed over the course of the trial, insights into barriers  
 198 and facilitators to referral, uptake and completion of PR ((i) attending at least 10 out of 12  
 199 designated PR sessions and (ii) attending the follow-up evaluation) will be explored in  
 200 qualitative interviews at the end of the trial.

## 201 **Secondary outcomes**

202 The secondary outcomes of this study are provided in table 2. Comparison of secondary outcome  
 203 measures of baseline and post intervention, will describe any changes in the health of the adults  
 204 living with COPD following completion of PR

**Table 2: Secondary outcome measures**

| Outcome measures                                                                                                        | Baseline | Post-intervention |
|-------------------------------------------------------------------------------------------------------------------------|----------|-------------------|
| Socio-demographics                                                                                                      | x        |                   |
| Lung health (spirometry data, smoking status, number of COPD exacerbations in the last year)                            | x        |                   |
| Comorbidities                                                                                                           | x        |                   |
| Treatments                                                                                                              | x        |                   |
| Nutritional status (Body Mass Index, mid upper arm circumference, skinfold thickness, self-report seven-day diet diary) | x        | x                 |
| Disease burden (MRC dyspnea grade, CAT, CCQ)                                                                            | x        | x                 |
| Economic impact of disease (WPAI)                                                                                       | x        | x                 |
| Quality of life (EQ-5D-5L)                                                                                              | x        | x                 |
| Pittsburgh Sleep Quality Index (PSQI)                                                                                   | x        | x                 |
| Psychological wellbeing (Hospital Anxiety and Depression scale)                                                         | x        | x                 |
| Physical function (5x sit-to-stand test)                                                                                | x        | x                 |
| Exercise capacity (ISWT, ESWT)                                                                                          | x        | x                 |
| International Physical Activity Questionnaire (IPAQ)                                                                    | x        | x                 |
| Accelerometer assessed physical activity (ActiGraph wGT3x-BT)                                                           | x        | x                 |

205 MRC - Medical Research Council, CAT- COPD Assessment Test, CCQ - Clinical COPD Questionnaire,  
 206 WPAI – Work Productivity and Activity Impairment questionnaire, EQ-5D-5L - EuroQol Five  
 207 Dimensions Five Levels, ISWT - Incremental Shuttle Walk Test, ESWT - Endurance Shuttle Walk Tests

## 208 **Sample size and recruitment target**

209 This study is a feasibility trial that aims to provide data for an accurate estimation of the required  
 210 sample size for future trials. Therefore, a formal sample size calculation is not required. We aim  
 211 to recruit and randomise 50 participants to the study (25 in each group).

## 212 **Patient allocation, concealment, and blinding**

213 Randomisation will occur through random permuted blocks to either the intervention group (PR+  
214 usual care) or control group (usual care) in ratio 1:1 using Sealed envelope™.

215 The computer-generated patient allocation sequence will be monitored by an individual who is  
216 independent of the research team and will inform the research team of group allocations via  
217 telephone. Participants will be informed about their group allocation after providing informed  
218 consent and completing baseline assessments.

219 It will not be possible to blind patients to their group allocation due to the nature of PR. Research  
220 staff will be blinded to outcome measures. Participants will be advised not to reveal their group  
221 during the follow-up assessment. Any episodes of un-blinding will be documented and reported.

## 222 **Data collection**

223 *Phase 1: Qualitative assessment for adaptation of PR*

### 224 **Focus groups with patient and family caregivers**

225 Focus groups with adults living with COPD and separate focus groups with their family  
226 members/ caregivers will be conducted until data saturation. We anticipate conducting up to 5  
227 focus groups with 6-8 participants in each. Data will be collected during patients' clinic visits.  
228 Focus group discussions will be audio-recorded, expected to last approximately 45-90 minutes,  
229 and will be conducted face-to-face by an interviewer and note-taker (observer). Focus groups  
230 will be transcribed verbatim, with identifiable information removed. Envisaged outcomes of the  
231 focus groups will include Sri Lankan specific adaptation of PR.

### 232 **Interviews with healthcare professionals involving the treatment of COPD**

233 Up to 15 in-depth interviews with healthcare professionals will be conducted until data  
234 saturation. Structured interviews will be conducted with healthcare professionals as convenient  
235 to them without interfering with their routine work. Interviews will be audio-recorded and will  
236 be conducted face-to-face by an interviewer. Interviews will be transcribed verbatim, with

237 identifiable information removed. Envisaged outcomes of the in-depth interviews will be a  
238 suitable design and content of PR acceptable respiratory health care deliverers in Sri Lanka.

### 239 *Phase 2: Single blind randomised control feasibility trial*

240 Data will be collected by trained researchers, following standard operating procedures during  
241 participants' clinic visits. Baseline and post intervention assessments will be carried out by the  
242 blinded Medical Officers consulting at the study setting.

243

### 244 *Phase 3: Qualitative evaluation of the PR intervention*

#### 245 **Focus groups with patients**

246 Participants allocated to the intervention group will be invited to participate in focus group  
247 discussions at the end of their PR programme. Focus groups will give an insight on views,  
248 experiences, opinions and recommendations which will inform future PR programmes. We  
249 anticipate conducting up to 5 focus groups until data saturation. Each focus group discussion will  
250 be conducted with 6-8 participants in each.

251 Focus group discussions will be audio-recorded, expected to last approximately 45-90 minutes,  
252 and will be conducted by a trained moderator and a note-taker). Focus groups will be transcribed  
253 verbatim, with identifiable information removed. Consent will be obtained from participants  
254 prior to their involvement in focus groups.

#### 255 **Interviews with PR staff**

256 Health care personnel involved in delivering PR will be invited to participate in in-depth  
257 interviews at the end of the study to discuss aspects of feasibility and acceptability, such as  
258 insights into barriers and facilitators to attendance, logistical barriers of running a PR programme  
259 and their perceptions, confidence of programme delivery and patients' experiences of the  
260 intervention. Details regarding previous experience on PR and prior training regarding PR will  
261 be assessed using brief questionnaire before commencing the in-depth interviews. We anticipate  
262 conducting up to 15 interviews, each expected to last approximately 15-60 minutes. Interviews

263 will be audio-recorded and will be conducted face-to-face by a trained interviewer. Interviews  
264 will be transcribed verbatim, with identifiable information removed.

#### 265 Book of testimonies and evaluation form

266 Participants within PR will be asked to log their experience of PR as they progress through the  
267 programme. This will be in the form of a PR log book accessible to participants before, during  
268 and after sessions, as well as a dedicated evaluation form which will be provided as  
269 supplementary material. Staff involved in PR will also receive the same evaluation form at the  
270 end of the study.

271

#### 272 Sample characteristics

273 Basic demographics including age, sex, religion, nationality, marital status, age of leaving full-  
274 time education, education level, ethnicity, employment status, monthly income, lung health,  
275 smoking status (packs per year), biomass fuel exposure, primary respiratory diagnosis, time since  
276 diagnosis in years, secondary respiratory diagnoses, family history of lung disease, comorbidities  
277 will be recorded at baseline.

#### 278 Lung function

279 Spirometry (post bronchodilator Forced Expiratory Volume in the first second (FEV<sub>1</sub>), post  
280 bronchodilator Forced Vital Capacity (FVC), FEV<sub>1</sub>/FVC ratio, carboxyhemoglobin test<sup>19</sup>,  
281 hospitalisations within the last 12 months, number of COPD exacerbations within the last 12  
282 months, treatments will be collected as the baseline data prior to the randomisation of  
283 participants.

#### 284 Nutritional status

285 Height (Holtain stadiometer), weight (calibrated weight scale) will be measured and body mass  
286 index will be calculated. Mid upper arm circumference of the participants will be measured using  
287 a measuring tape and skinfold thickness of seven sites (triceps, mid axillary, subscapular, chest,  
288 abdominal, supra iliac and thigh measurements) of the body will be measured using a validated  
289 caliper. Triplicated measurements will be taken by the same investigator and mean value will be

1  
2  
3 290 used for the calculation of body fat mass. Fat free mass will be calculated using Durnin and  
4 291 Womersley formula.<sup>20, 21</sup> Body composition analysis will be assessed using bioelectrical  
5 292 impedance (SFB7 Impedi Med dual frequency instrument, Impedi Med Limited, Australia) and  
6 293 software version 5.2.4.0.<sup>22</sup> Seven-day diet diary method will be used to assess the dietary history  
7 294 and calorie intake.

### 295 Disease burden

15 296 Breathlessness will be measured using MRC dyspnoea grade (5-items).<sup>23</sup> The health-related  
16 297 quality of life related to mobility, self-care, usual activities, pain/discomfort and anxiety-  
17 298 depression will be measured using EQ-5D-5L (25-items),<sup>24</sup> Clinical status of the airways,  
18 299 functional limitations and psychosocial dysfunction will be determined using CCQ (10 -items),<sup>25</sup>  
19 300 CAT (8-items) will be used to determine the severity of the COPD,<sup>26</sup> Modified brief pain  
20 301 inventory (3-items) will determine the commonly reported chest pain, WPAI (8-items) will be  
21 302 used to measure the effect of severity of COPD and general health on work productivity and  
22 303 regular activities<sup>27</sup> and HADS (14-items) will be used to measure the patient's emotional state  
23 304 and the presence or absence of clinically significant anxiety and depression.<sup>28</sup> Sleep quality of  
24 305 the participants will be measured using Pittsburgh Sleep Quality Index (PSQI)<sup>29</sup>. Disease burden  
25 306 will be measured as baseline data prior to the randomisation and post-intervention data.

### 307 Exercise capacity

308 Following a safety assessment for absolute and relative contraindications for field walking  
309 tests<sup>30</sup>, maximal exercise capacity will be assessed using the incremental shuttle walking test  
310 (ISWT)<sup>31</sup> and endurance shuttle walking test (ESWT).<sup>18</sup> The ISWT and ESWT also include a  
311 pre-test and post-test measure of SpO<sub>2</sub>, blood pressure, Borg rating of breathlessness<sup>32</sup>, heart  
312 rate, Borg rate of perceived exertion.<sup>33</sup> The sit-to stand test will be completed for five continuous  
313 repetitions, to measure lower limb movement and strength.<sup>34</sup> All measures of exercise capacity  
314 will be measured at baseline prior to the randomisation and post-intervention.

### 315 Physical activity

316 Subjective health-related physical activity will be measured with the International Physical  
317 Activity Questionnaire (IPAQ)<sup>35</sup> at baseline prior to the randomisation and post-intervention.

318 Participants will be asked to wear an activity monitor (ActiGraph wGT3X-BT, ActiGraph,  
 319 Pensacola, FL, USA), able to detect a range of PA intensities<sup>36</sup>, on the right anterior hip during  
 320 waking hours for seven days prior to attending PR (baseline) and for the seven consecutive days  
 321 prior to their discharge assessment (follow-up); taking it off for water-based activities and sleep.  
 322 The collection of physical activity data will coincide with a 7-day diet diary. Printed instructions  
 323 will be provided to the participants regarding how to wear the monitor.

324 Full accelerometry methodology is provided in Table 3. Data will be processed as 60-s epoch  
 325 files in ActiLife version 6.13.4 (ActiGraph, Pensacola, FL, USA). Non-wear will be defined as  
 326 60-minutes of consecutive zero counts with allowance for 2-minutes of interruptions.<sup>37</sup>  
 327 Adherence to wearing the monitors will be assessed by examining the proportion of participants  
 328 providing valid accelerometer data across a range of valid days ( $\geq 1-7$  days) and minimum wear  
 329 time ( $\geq 1-12$  hours) thresholds. For reported group averages, only participants providing  $\geq 4$  valid  
 330 days of  $\geq 8$  hours, for both time points will be included in the analyses.<sup>38</sup> Step count, time spent  
 331 in different absolute intensity classifications of physical behaviours<sup>39</sup> and average movement  
 332 intensity (activity counts per minute) will be reported. Time spent in physical activity matching  
 333 participants' prescribed walking exercise intensity will be derived by aligning the average  
 334 walking speed during the ESWT with the activity monitor counts per minute.

335

**Table 3: Accelerometry data collection and processing parameters**

|                         |                                                                                                                                                                                                                                        |
|-------------------------|----------------------------------------------------------------------------------------------------------------------------------------------------------------------------------------------------------------------------------------|
| Accelerometer Model     | ActiGraph wGT3X-BT (version 6.13.4; firmware 1.9.2 )                                                                                                                                                                                   |
| Serial number range     | Twenty unique devices will be used ranging from MOS2E09190601 to MOS2E24190146 averaging six deployments per device (same serial used for baseline and follow-up wear periods)                                                         |
| Piezosensor orientation | Triaxial                                                                                                                                                                                                                               |
| Mode setup              | Mode 29 (x, y, z, steps, lux)                                                                                                                                                                                                          |
| Original sample rate    | 100 Hz (.gt3x file format)                                                                                                                                                                                                             |
| Deployment method       | Baseline:<br>Fitted by research team on Day 0 (Baseline PR Assessment)<br>Fitted by participant on Day 1<br>Follow-up:<br>Fitted by research team Day 0 (11 <sup>th</sup> /12 <sup>th</sup> session)<br>Fitted by participant on Day 1 |
| Location worn           | Anterior hip adjacent to the mid-line of the thigh                                                                                                                                                                                     |
| Requested days of wear  | 7 days of free-living (Day 1-7; 10,080 epochs)                                                                                                                                                                                         |



|                                     |                                                                                                                                                                                                                      |
|-------------------------------------|----------------------------------------------------------------------------------------------------------------------------------------------------------------------------------------------------------------------|
| Initialization                      | Not deployed in delay mode in order to standardised capture of Day 0 (00:00) with stop time based on date of first PR class (baseline) and data of discharge assessment (follow-up)                                  |
| Wear instructions                   | Wear continuously except for sleep and water based activities                                                                                                                                                        |
| Non-wear appropriation              | $\geq 60$ min of consecutive 0s with allowance for 2 minutes of interruptions were deemed biologically implausible and coded as non-wear                                                                             |
| Valid day criteria                  | $\geq 8$ hours of valid waking wear time                                                                                                                                                                             |
| Valid file                          | $\geq 4$ valid days for each of the two time points                                                                                                                                                                  |
| Missing data                        | Data modelling or imputation will not be performed                                                                                                                                                                   |
| Epoch length                        | 60 seconds                                                                                                                                                                                                           |
| Intensity classification (absolute) | Uniaxial (x-axis) cut-points as follows: Sedentary time <100 cpm; Light intensity 100-2019 cpm; Moderate intensity 2020-5998cpm; Vigorous intensity $\geq 5999$ cpm (Moderate-to-vigorous intensity $\geq 2020$ cpm) |
| Intensity classification (relative) | Uniaxial (x-axis) cut-points based on Endurance Shuttle Walk Test performance                                                                                                                                        |

336

## 337 Patient and Public Involvement

338 Adults living with COPD often tell us how having COPD impacts their lives and that they often  
 339 find it challenging to know what they can do to better manage their condition. When they talk  
 340 about their self-management strategies, it is clear that education and exercise support would be  
 341 of value. Also, they revealed the necessity of a programme to support their condition and  
 342 willingness to attend such a programme. Patients are generally positive about being able to  
 343 access support but there is little available to them. The study was planned to fulfill the need of  
 344 adults living with COPD. The delivery and adaptations of the trial intervention (Sri-Lankan  
 345 specific PR) will also be informed by the adults living with COPD, their care-givers /family  
 346 members and health care professionals. Priorities, experience, and preferences of the  
 347 stakeholders will be utilized to design the PR. Health care professionals involved in the treatment  
 348 of COPD at Central Chest Clinic will be involved in the recruitment as key informants and  
 349 conduct of the study. The feasibility and acceptability of the PR intervention among adults living  
 350 with COPD and healthcare staff involved in its delivery will be assessed in qualitative interviews  
 351 at the end of the trial. The results of the trial will be disseminated through patient and public  
 352 involvement events, local and international conference proceedings. As well as all the research



353 participants, stakeholders and individuals with COPD will be openly invited to take part in an  
 354 event organized at the central chest clinic to reveal the study findings.

355

### 356 **Costing**

357 As part of this trial, the cost of creating a Sri-Lankan adapted PR programme will be calculated.  
 358 This will include both single and recurrent costs. Single payments include the necessary costs to  
 359 set up and run a programme, whilst recurrent cost refers to any item with a life expectancy of 1  
 360 year or less and typically includes disposable materials.<sup>40</sup> The fixed costs will be captured prior  
 361 to the first participant enrolling into the programme and the recurrent costs will be collected at  
 362 the mid-stage of recruitment. An average cost per participant will be calculated. Table 4  
 363 demonstrates the variables that will be used to calculate fixed and recurrent costs.

364

**Table 4: The variables used to calculate fixed and recurrent costs (not an exhaustive list)**

| <b>Fixed costs</b>                                                                                                                                             | <b>Recurrent costs</b>                                                                                              |
|----------------------------------------------------------------------------------------------------------------------------------------------------------------|---------------------------------------------------------------------------------------------------------------------|
| Venue hire                                                                                                                                                     | Venue hire                                                                                                          |
| Electrical equipment (laptop, printer, projector)                                                                                                              | Staff time to conduct PR (assessment at baseline and discharge, conduct PR classes, telephone calls and data entry) |
| Equipment for PR (weights, treadmill, cycle ergometer, country-specific equipment, step-up box, chairs)                                                        | Disposable equipment (for blood glucose monitor, spirometer mouthpieces, nose-clips, glyceryl trinitrate spray)     |
| Equipment for shuttle walking tests (cones, licences, stop watches, tape measure, electrical equipment to play audio)                                          | Servicing costs (spirometer, PR equipment, specifically treadmills and cycle ergometers)                            |
| Equipment for PR assessment (height stadiometer, weight scales, sphygmomanometer, pulse oximeter, spirometer, calibration syringe, country-specific equipment) | Miscellaneous (Oxygen cylinders, questionnaire licences, stationery (paper))                                        |
| Additional safety equipment (blood glucose monitor, Oxygen cylinder holder)                                                                                    |                                                                                                                     |

|                                                                                                                   |  |
|-------------------------------------------------------------------------------------------------------------------|--|
| Miscellaneous (filing cabinets, storage units, questionnaire translations, questionnaire licences, staff uniform) |  |
|-------------------------------------------------------------------------------------------------------------------|--|

365

366

### 367 **Data management**

368 Data collected during the study will be entered into a database using Research Electronic Data  
369 Capture (REDCap), which is a web-based platform.<sup>41</sup> Access to the database will be via a secure  
370 password protected web-interface. The participants will be identified by a study-specific  
371 identification code. Data will be validated using real-time data entry validation and electronic  
372 checks lead by the Independent Data Monitoring Committee (IDMC), established at the  
373 University of Leicester, UK.

### 374 **Quantitative data analysis**

375 The data will be analyzed using IBM SPSS Statistics for Windows, Version 23.0. Data for  
376 baseline and follow-up time-points will be presented as descriptive statistics as appropriate. No  
377 inferential statistics will be performed due to the feasibility design of the trial.

### 378 **Qualitative data analysis**

379 Qualitative data will be analyzed using Thematic Analysis. This approach follows six distinct  
380 stages: familiarization with data; generating initial codes; searching for themes; reviewing  
381 themes; defining and naming themes and producing the report.<sup>42</sup> The responsible investigator  
382 will carry out initial coding and a sample of focus group transcripts will be coded by a second  
383 member of the team to improve consistency and to enhance interpretive authenticity. Throughout  
384 the data analysis, the team will meet to discuss and review emerging themes and search the  
385 accounts that provide contesting views of the same phenomena. Close attention will be paid to  
386 the complexity and interactions inherent in the focus group data.<sup>43</sup>

### 387 **Adverse events**

1  
2  
3 388 All adverse events and serious adverse events will be recorded on an adverse event log, within  
4 389 study trial management paperwork, case report forms and REDCap. There will be no formal  
5  
6 390 interim analysis of data due to the feasibility nature of the trial. The IDMC will review high level  
7  
8 391 safety data. Adverse events will be monitored at least every month, and as needed on an ad hoc  
9  
10 392 basis, to ensure the continuing safety of the participants. The Scientific Committee will  
11  
12 393 determine the need to terminate the trial. Participants who experience any such event will be  
13  
14 394 directed to the appropriate hospital and all the necessary care will be ensured and followed-up  
15  
16 395 until the participant has resolved or stabilized.  
17

18 396

### 21 397 **Ethics and dissemination**

22  
23 398 Ethical approval was obtained from the ethics review committee of the Faculty of Medical  
24  
25 399 Sciences, University of Sri Jayewardenepura (FMS/USJP ERC 64/19) and the University of  
26  
27 400 Leicester, United Kingdom (26770). Further permission for the proposed study will be obtained  
28  
29 401 from the relevant authority at the Central Chest Clinic, Colombo, Sri Lanka. Privacy and the  
30  
31 402 confidentiality of all information and identities of participants will be strictly maintained and will  
32  
33 403 not be disclosed when publishing the results of the study. A copy of the test results obtained will  
34  
35 404 be provided to each participant at the end of the trial for subsequent follow-up and treatment at  
36  
37 405 the clinic. Compensation for travelling will be provided to all the participants. All study  
38  
39 406 documents will be translated to Sinhala and Tamil to ensure clear communication. Participation  
40  
41 407 will be without compulsion and each participant has the right to withdraw at any time, without  
42  
43 408 providing a reason. Consent form and data sheets will be securely stored in a separate locked  
44  
45 409 cupboard. Study computers will be password protected. The participants (adults living with  
46  
47 410 COPD) of the phase 1 study also will be provided the opportunity to participate the PR. All the  
48  
49 411 data will be stored safely up to 6 years and after 6 years consent form and data sheets will be  
50  
51 412 disposed of appropriately. Study team and IDMC only will have access to final trial dataset. Data  
52  
53 413 from the Global RECHARGE Core Dataset will be made available following the completion of  
54  
55 414 this project and we are considering the best tools to use to make this database available to the  
56  
57 415 wider community. Any modifications of the protocol will be updated on trial registry (ISRCTN)  
58  
59 416 and will be informed to the ethics review committee and the participants. Participants will be

1  
2  
3 417 provided the provisions for re-consenting after any change of the approved protocol. It will be  
4  
5 418 made clear in the publication of trial findings.  
6  
7

8 419

9  
10 420

11  
12  
13 421 **Author affiliations**

14  
15 422 <sup>1</sup>Faculty of Health Sciences, KAATSU International University, Sri Lanka

16 423 <sup>2</sup>Centre for Exercise and Rehabilitation Science, NIHR Leicester Biomedical Research Centre-  
17  
18 424 Respiratory, University Hospitals of Leicester NHS Trust, UK

19 425 <sup>3</sup>Department of Respiratory Sciences, University of Leicester, Leicester, UK,

20 426 <sup>4</sup>Sports Medicine Unit, Colombo South Teaching Hospital, Kalubowila, Sri Lanka

21 427 <sup>5</sup>Department of Nursing and Midwifery, Faculty of Allied Health Sciences, University of Sri  
22  
23 428 Jayewardenepura, Sri Lanka

24 429 <sup>6</sup>National Hospital of Sri Lanka and Central Chest Clinic, Colombo, Sri Lanka

25 430 <sup>7</sup>Primary Care Respiratory Group, Sri Lanka

26 431 <sup>8</sup>Faculty of Health, University of Plymouth, UK

27 432 <sup>9</sup>School of Sport, Exercise and Health Sciences, Loughborough University, UK

28 433 <sup>10</sup>Department of Economics, University of Sheffield, Sheffield, UK

29 434 <sup>11</sup>Faculty of Medical Sciences, University of Sri Jayewardenepura, Sri Lanka  
30  
31  
32  
33  
34  
35  
36  
37  
38  
39 435

40  
41  
42 436 **Author contribution**

43  
44 437 All authors (Akila R Jayamaha, Chamilya H Perera, Mark W Orme, Amy V Jones, Upendra K D  
45 438 C Wijayasiri, Thamara D Amarasekara, Ravini de S Karunatillake, Amitha C Fernando,  
46 439 Seneviratne A L P De S., Andy Barton, Rupert Jones, Zainab K Yusuf, Ruhme B Miah, Dominic  
47 440 Malcolm, Jesse A Matheson, Robert C Free, Adrian Manise, Michael C Steiner, Savithri W  
48 441 Wimalasekera, Sally J Singh) have substantially contributed to the conception and design of the  
49 442 study. Akila R Jayamaha drafted the manuscript. All authors of the paper have revised the  
50  
51  
52  
53  
54  
55  
56  
57  
58  
59  
60

1  
2  
3 443 content and approved the final version to be published. All authors are accountable for all aspects  
4  
5 444 of the work.

6  
7  
8 445 **Funding** This research was funded by the National Institute for Health Research (NIHR)  
9  
10 446 (17/63/20) using UK aid from the UK Government to support global health research. The views  
11  
12 447 expressed in this publication are those of the author(s) and not necessarily those of the NIHR or  
13  
14 448 the UK Department of Health and Social Care.

15  
16 449 **Competing interests** None declared.

17  
18 450

19  
20 451 [insert figure caption]

21  
22  
23 452 Figure 1: Flow of participant of the three phases of the study

24  
25  
26 453

27  
28 454 References

- 29  
30  
31 455 1. Singh D, Agusti A, Anzueto A, Barnes PJ, Bourbeau J, Celli BR, et al. Global Strategy for  
32  
33 456 the Diagnosis, Management, and Prevention of Chronic Obstructive Lung Disease: the  
34  
35 457 GOLD science committee report 2019. *Eur Respir J.* 2019;53(5).
- 36 458 2. Alwan A. Global Status Report on Non-Communicable Diseases. WHO, 2010
- 37  
38 459 3. World Health Organization. Global surveillance, prevention and control of Chronic  
39  
40 460 Respiratory Diseases, Switzerland, 2007; 22-23.
- 41 461 4. Amarasiri L, Fernando A, Gunasekara K, Gunasinghe W, Madegedara D, Wickramasinghe  
42  
43 462 R. The prevalence of Chronic Obstructive Pulmonary Disease in Sri Lanka. *European*  
44  
45 463 *Respiratory Journal*, 2017; 2017(50):1212.
- 46 464 5. World Health Organization. WHO strategy for prevention and control of chronic respiratory  
47  
48 465 diseases, Geneva, 2017.
- 49  
50 466 6. Yasaratne D, Dharmage SC. Letter from Sri Lanka. *Respirology.* 2020;25:339-41.
- 51  
52 467 7. Pinnock H, Kendall M, Murray SA, Worth A, Levack P, Porter M, et al. Living and dying  
53  
54 468 with severe chronic obstructive pulmonary disease: Multi-perspective longitudinal qualitative  
55  
56 469 study. *BMJ.* 2011;342:268.

- 1  
2  
3 470 8. Singh SJ, Halpin DMG, Salvi S, Kirenga BJ, Mortimer K. Comment Exercise and pulmonary  
4 471 rehabilitation for people with chronic lung disease in LMICs : challenges and opportunities.  
5 472 *Lancet Respir* [Internet]. 2019;7(12):1002–4.  
6  
7 473 9. Nici L, Donner C, Wouters E, Zuwallack R, Ambrosino N, Bourbeau J, et al. American  
8 474 Thoracic Society Documents American Thoracic Society / European Respiratory Society  
9 475 Statement on Pulmonary Rehabilitation. *Am J Respir Crit Care Med*. 2006;173(May):1390-  
10 476 413.  
11  
12 477 10. Mccarthy B, Casey D, Devane D, Murphy K, Murphy E, Lacasse Y, et al. Pulmonary  
13 478 rehabilitation for chronic obstructive pulmonary disease (Review). *Cochrane Database Syst*  
14 479 *Rev*. 2015;2015(2).  
15  
16 480 11. Jones AW, Taylor A, Gowler H, Kelly NO, Ghosh S, Bridle C. Systematic review of  
17 481 interventions to improve patient uptake and completion of pulmonary rehabilitation in  
18 482 COPD. *ERJ Open Res*. 2017;3.  
19  
20 483 12. Chan AW, Tetzlaff JM, Altman DG, Laupacis A, Gøtzsche PC, Krleža-Jerić K, et al. Spirit  
21 484 2013 statement: Defining standard protocol items for clinical trials. *Chinese J Evidence-Based*  
22 485 *Med*. 2013;13(12):1501–7.  
23  
24 486 13. Bolton CE, Bevan-Smith EF, Blakey JD, et al. British Thoracic Society guideline on  
25 487 pulmonary rehabilitation in adults: accredited by NICE. *Thorax*. 2013;68:ii1-ii30.  
26  
27 488 14. Ries AL, Bauldoff GS, Casaburi R, Mahler DA, Rochester CL, Herrerias C. Pulmonary  
28 489 Rehabilitation; Joint ACCP/AACVPR Evidence-Based Clinical Practice Guidelines. *Chest*.  
29 490 2007;131(5):4S-42S.  
30  
31 491 15. Blackstock FC, Evans RA. Rehabilitation in lung diseases: ‘Education’ component of  
32 492 pulmonary rehabilitation. *Respirology*. 2019;24(9):863–70  
33  
34 493 16. Spencer LM, McKeough ZJ. Maintaining the benefits following pulmonary rehabilitation:  
35 494 Achievable or not? *Respirology*. 2019;24(9):909–15.  
36  
37 495 17. Armstrong M, Vogiatzis I. Personalized exercise training in chronic lung diseases.  
38 496 *Respirology*. 2019;24(9):854–62.  
39  
40 497 18. Revill SM, Morgan MDL, Singh SJ, Williams J, Hardman AE. The endurance shuttle walk :  
41 498 a new field test for the assessment of endurance capacity in chronic obstructive pulmonary  
42 499 disease. *Thorax*. 1999;54(2):213–22  
43  
44 500 19. Yasuda H, Yamaya M, Nakayama K, Ebihara S, Sasaki T, Okinaga S, et al. Increased  
45  
46  
47  
48  
49  
50  
51  
52  
53  
54  
55  
56  
57  
58  
59  
60

- 1  
2  
3 501 Arterial Carboxyhemoglobin Concentrations in Chronic Obstructive Pulmonary Disease. *Am*  
4 502 *J Respir Crit Care Med.* 2005;171:1246–51.
- 5  
6 503 20. Durmin JVGA, Womersley J. Body fat assessed from total body density and its estimation  
7 504 from skinfold thickness: measurements on 481 men and women aged from 16 to 72 Years. *Br*  
8 505 *J Nutr.* 1974;32:77–96.
- 9  
10 506 21. Doña E, Olveira C, Palenque FJ, Porrás N, Dorado A, Martín-valero R, et al. Body  
11 507 Composition Measurement in Bronchiectasis: Comparison between Bioelectrical Impedance  
12 508 Analysis, Skinfold Thickness Measurement, and Dual-Energy X-ray Absorptiometry before  
13 509 and after Pulmonary Rehabilitation. *J Acad Nutr Diet.* 2018;118(8):1464–73.
- 14  
15 510 22. Lanerolle MD, Lanerolle P, Atukorala S, Silva A De. Enhancing the accuracy of bio  
16 511 impedance analysis in assessing total body water. *Int J Body Compos Res.* 2012;10(1):29–34.
- 17  
18 512 23. Bestall JC, Paul EA, Garrod R, Garnham R, Jones PW, Wedzicha JA. Usefulness of the  
19 513 Medical Research Council (MRC) dyspnoea scale as a measure of disability in patients with  
20 514 chronic obstructive pulmonary disease. *Thorax.* 1999;54:581–6.
- 21  
22 515 24. Herdman M, Gudex C, Lloyd A, Janssen M, Kind P, Parkin D, et al. Development and  
23 516 preliminary testing of the new five-level version of EQ-5D (EQ-5D5L). *Quality of Life*  
24 517 *Research.* 2011;20(10):1727-736.
- 25  
26 518 25. Van der Molen T, Willemse BW, Schokker S, et al. Development, validity and  
27 519 responsiveness of the Clinical COPD Questionnaire. *Health Qual Life Outcomes.* 2003;1:13.
- 28  
29 520 26. Papaioannou M, Pitsiou G, Manika K, Kontou P, Zarogoulidis P, Sichletidis L, Kioumis IP.  
30 521 COPD assessment test: A simple tool to evaluate disease severity and response to treatment.  
31 522 *J of Chronic Obstructive Pulmonary Disease.* 2014;11:489- 95.
- 32  
33 523 27. Reilly MC, Zbrozek IAS, Dukes EM. The Validity and Reproducibility of a Work  
34 524 Productivity and Activity Impairment Instrument. *Pharmacoeconomics.* 1993;4(5):353–65.
- 35  
36 525 28. Zigmond AS, Snaith RP. The hospital anxiety and depression scale. *Acta Psychiatrica*  
37 526 *Scandinavica.* 1983;67(6):361-70.
- 38  
39 527 29. Buysse DJ, Reynolds CF, Monk TH, et al. The Pittsburgh Sleep Quality Index: a new  
40 528 instrument for psychiatric practice and research. *Psychiatry Res.* 1989;28:193–213
- 41  
42 529 30. Weisman IM, Marciniuk D, Martinez FJ, Sciruba F, Sue D, Myers J, et al. American  
43 530 Thoracic Society / American College of Chest Physicians ATS / ACCP Statement on  
44 531 Cardiopulmonary Exercise Testing. *Am J Respir Crit Care Med.* 2003;167:211–77.



- 1  
2  
3 532 31. Singh SJ, Morgan MD, Scott S, Walters D, Hardman AE. Development of a shuttle walking  
4 533 test of disability in patients with chronic airways obstruction. *Thorax*. 1992;47(12):1019-24.  
5  
6 534 32. Mahler DA, Horowitz MB. Perception of breathlessness during exercise in patients with  
7 535 respiratory disease. *Med Sci Sports Exerc*. 1994;26:1078-1081.  
8  
9 536 33. Borg GA. Psychophysical bases of perceived exertion. *Med Sci Sports Exerc*. 1982;14:377-  
10 537 381  
11  
12 538 34. Jones SE, Kon SSC, Canavan JL, Patel MS, Clark AL, Nolan CM, et al. The five-repetition  
13 539 sit-to-stand test as a functional outcome measure in COPD. *Thorax*. 2013;68:1015-20.  
14  
15 540 35. Booth M: Assessment of physical activity: An International perspective. *Research Quarterly*  
16 541 *for Exercise and Sport*. 2000, 71 (2): 114-120.  
17  
18 542 36. Bassett DR, John D. Use of pedometers and accelerometers in clinical populations: validity  
19 543 and reliability issues. *Phys Ther Rev*. 2010;15:135-42.  
20  
21 544 37. Choi L, Liu Z, Matthews CE, Buchowski MS. Validation of accelerometer wear and nonwear  
22 545 time classification algorithm. *Med Sci Sports Exerc*. 2011;43:357-64.  
23  
24 546 38. Demeyer H, Burtin C, Van Remoortel H, Hornikx M, Langer D, Decramer M, et al.  
25 547 Standardizing the analysis of physical activity in patients with COPD following a pulmonary  
26 548 rehabilitation program. *Chest* 2014 Aug;146(2):318-327  
27  
28 549 39. Troiano RP, Berrigan D, Dodd KW, Mâsse LC, Tilert T, McDowell M. Physical activity in  
29 550 the United States measured by accelerometer. *Med Sci Sports Exerc* 2008 Jan;40(1):181-188.  
30  
31 551 40. Lucas AO, Gilles HM. Approaches to economic evaluation. *Short Textbook of Public Health*  
32 552 *Medicine for the Tropics*. 2002. CRC Press.  
33  
34 553 41. Harris PA, Taylor R, Minor BL, Elliott V, Fernandez M, Neal LO, et al. The REDCap  
35 554 consortium: Building an international community of software platform partners. *J Biomed*  
36 555 *Inform*. 2019;95.  
37  
38 556 42. Braun V, Clarke V. Using thematic analysis in psychology. *Qual Res Psychol*. 2006;3:77-101  
39  
40 557 43. Maguire M, Delahunt B. Doing a Thematic Analysis : A Practical, Step-by-Step Guide for  
41 558 Learning and Teaching Scholars. *AISHE-J*. 2017;8(3):3351-14.  
42  
43  
44  
45  
46  
47  
48  
49  
50  
51  
52  
53  
54  
55  
56  
57  
58  
59  
60



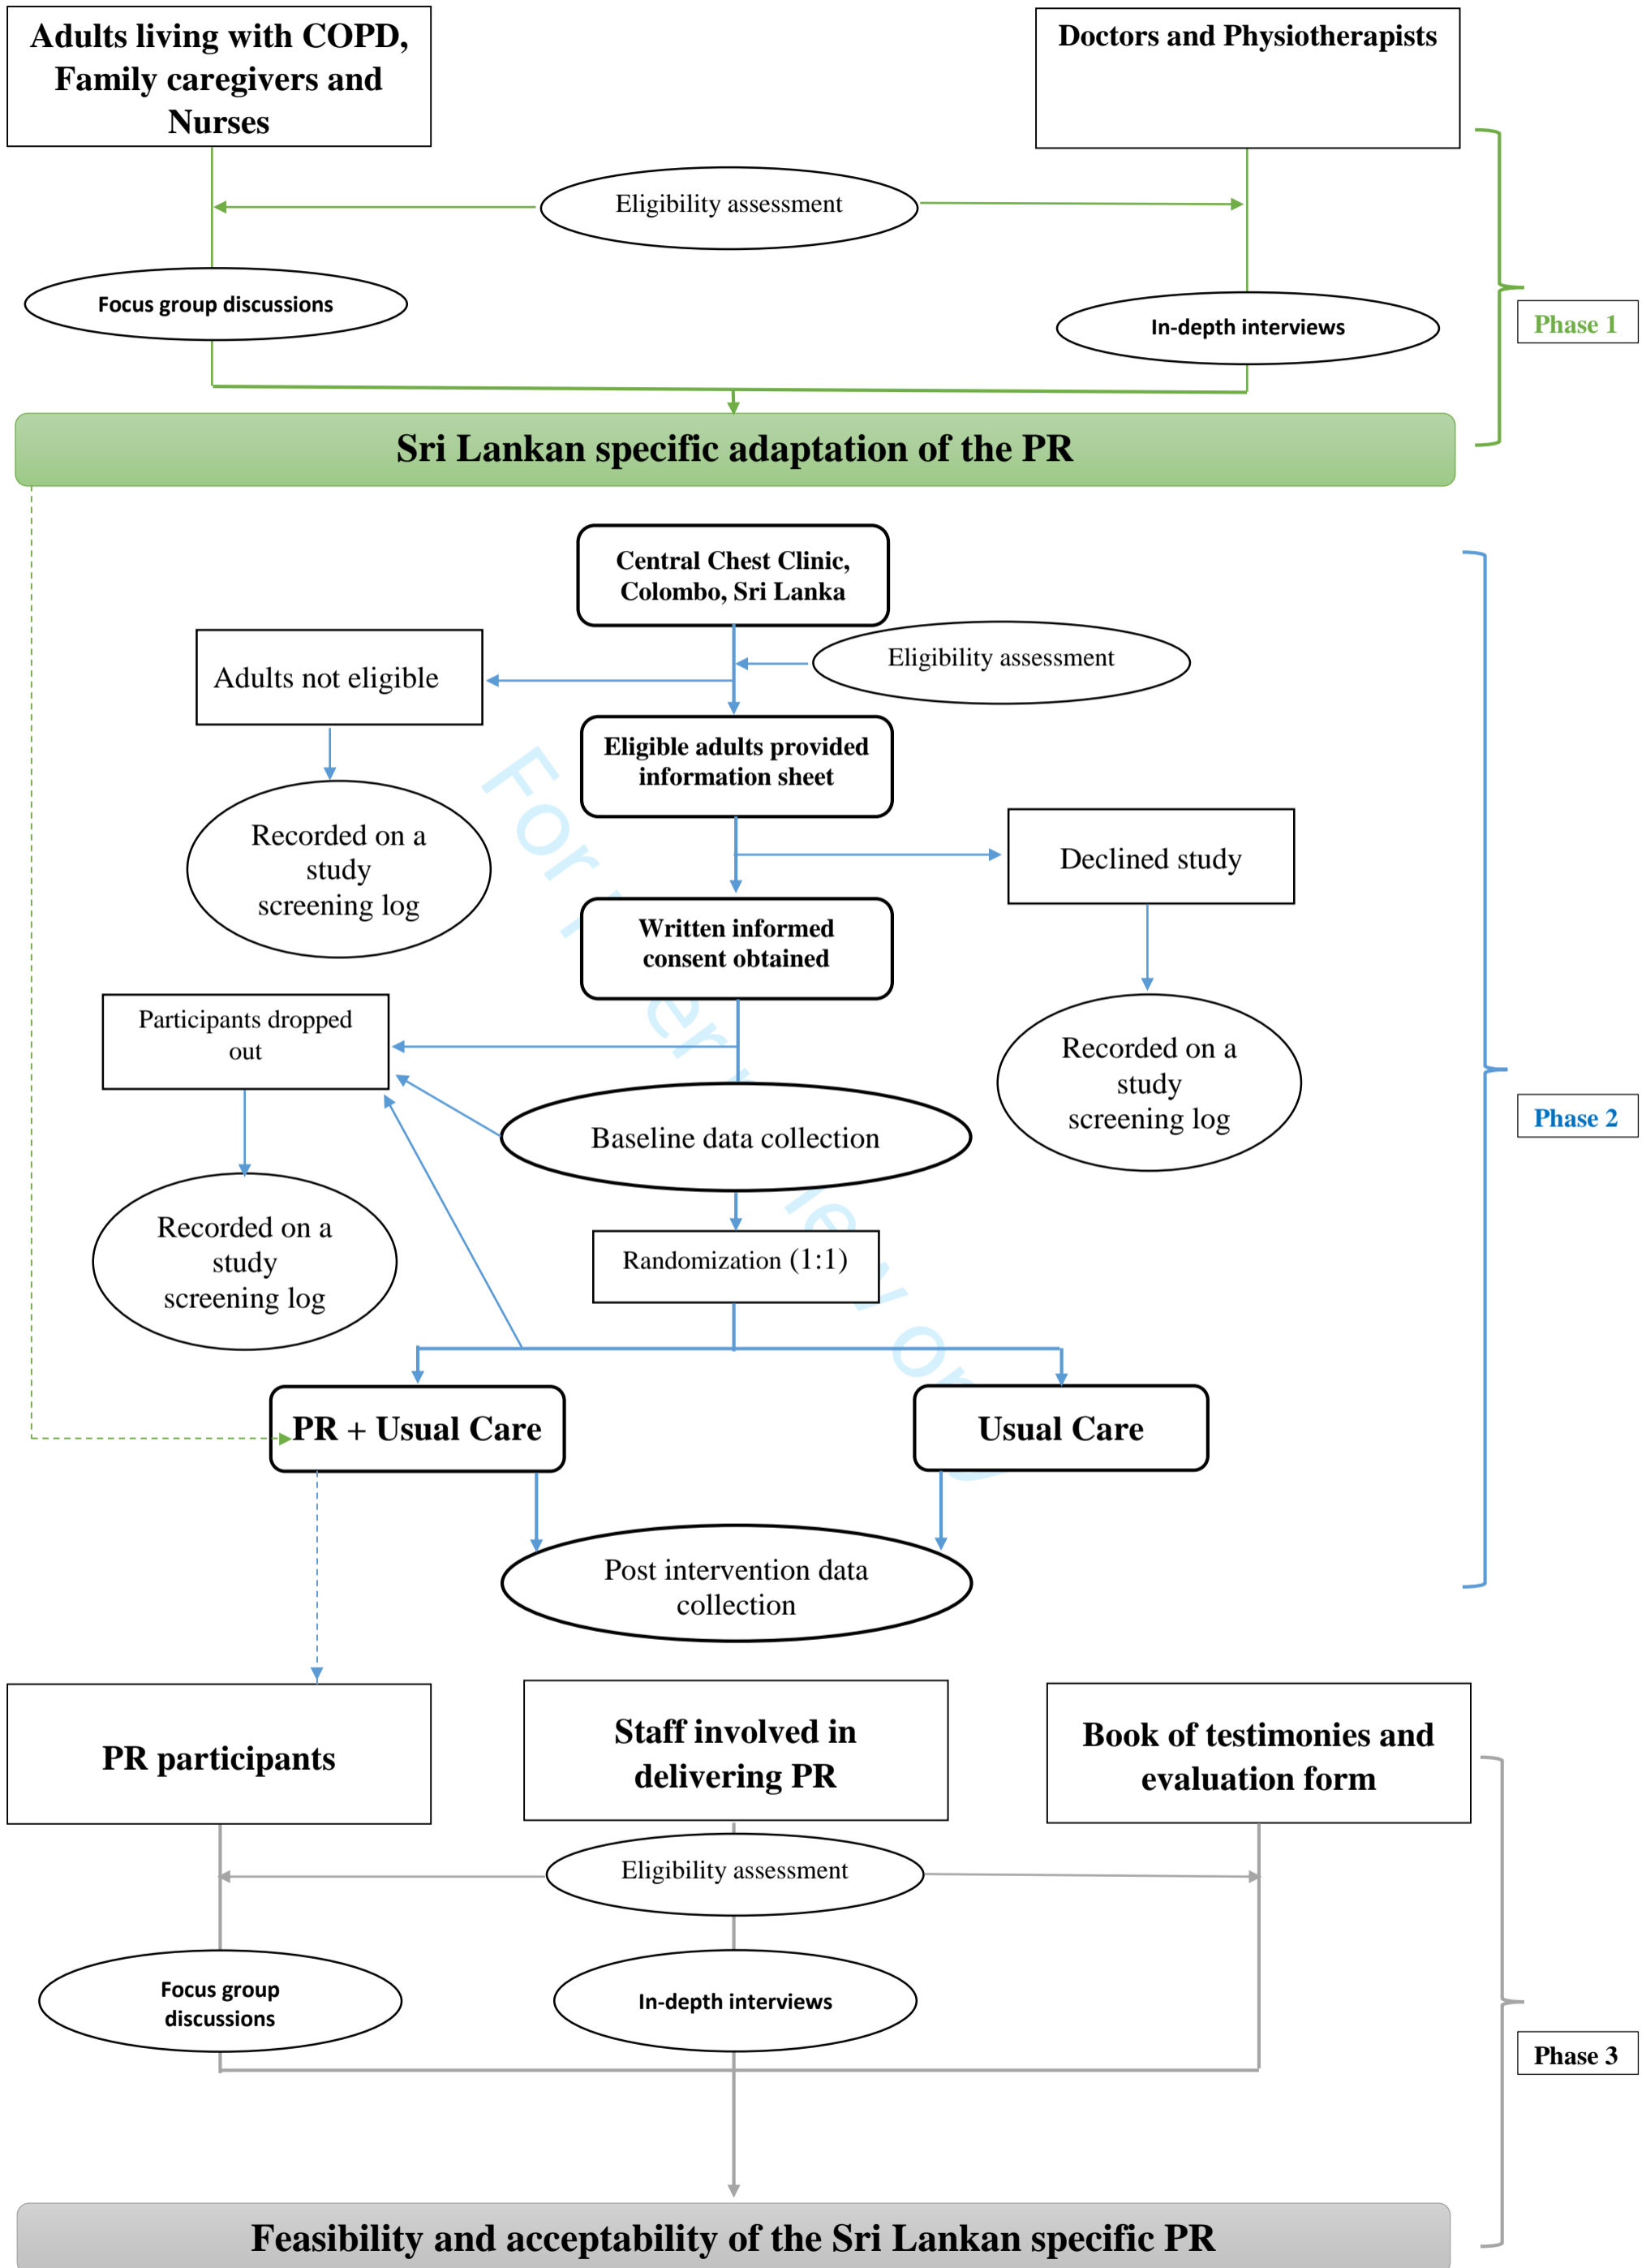

## Appendices

### Information sheet

#### **Cultural adaptation of Pulmonary Rehabilitation and subsequent testing in a Randomised Controlled Feasibility Trial for Adults with Chronic Obstructive Pulmonary Disease in Sri Lanka**

I am Prof. S. W. Wimalasekera, of Department of Physiology, Faculty of Medical Sciences, University of Sri Jayewardenepura. I and my team of health care personnel are, conducting a research on “Testing the Feasibility and Acceptability of a Culturally Appropriate Hospital-Based Pulmonary Rehabilitation (PR) Programme for Adults with Chronic Obstructive Pulmonary Disease in Sri Lanka”. I invite you to participate in the study. Please take time and read the following information carefully before giving your consent. You are free to ask questions to clarify facts which are not clear or ask for more information if you need.

#### **Purpose of the study**

The purpose of this study is to devise an appropriate PR programme and then determine the feasibility and acceptability of this programme for adults living with COPD in Sri Lanka and assess the potential for a future trial of its effectiveness.

#### **When you participate you will be required to do the following**

You will be requested to participate several components of the study.

You will participate in a group discussion conducted in a quiet room in the clinic (conference hall) with very minimal disturbances. At the beginning of the discussion you will answer some questions regards your personal information, (age, gender, history of the disease condition). Then the interviewer will ask some questions regarding your thoughts and ideas about pulmonary rehabilitation. You and your group members can freely comment on the questions or can add your ideas to the discussion. The interview takes around forty-five minutes of time.

You will also participate in a feasibility trial which you will be allocated to one of the two groups. One group will receive usual care and PR and the other group will receive only usual care which consists of pharmacological treatment and brief information about disease condition, medication and inhaler techniques. PR is typically a 6-week rolling programme and consisting of 12 sessions in total, delivered twice a week. Sessions usually last approximately two hours, with one hour for exercise training and one hour for education. Some routine and specific test and measurements will be taken before and after the intervention will describe any changes in the health of the adults living with COPD.

If you are allocated to the group who receive the PR, you will be asked to share your experiences regarding the PR and subjected modification and opinions on pulmonary rehabilitation.

In order to maintain accuracy, and to keep records, your discussion will be recorded by the research team members with your permission. Your participation in the project will remain confidential and the provision of your name and address is necessary for us to maintain records. Any personal information gathered during the study will not be disclosed to a third party. Your responses to the questions and will

1  
2  
3 only be used for the purpose of this project. You can be assured that you will remain anonymous if you  
4 take part in the project. Your participation in this project is entirely voluntary. You are not obliged to take  
5 part. If you do not wish to take part, you can withdraw without giving a reason and your medical care will  
6 not be affected, further you will not be contacted again. Similarly, if you do agree to participate, you are  
7 free to withdraw at any time during the project.  
8  
9  
10

### 11 **What are the possible benefits of taking part?**

12  
13 By participating in the study, you will contribute to develop a PR programme which helps to improve the  
14 quality of life of the adults living with COPD. As well as you will contribute to determine the feasibility  
15 and acceptability of this programme within the health care system in Sri Lanka.  
16  
17  
18

### 19 **What are the possible disadvantages and risks of taking part?**

20  
21 You will be undertaking some physical tests as part of the research. Therefore, there may be a very small  
22 risk of falls, breathlessness, changes in blood pressure and changes in heart rate. However, these risks are  
23 very rare, and trained staff and emergency equipment will be available to deal with any serious events.  
24 Participants who experience any such event will be directed to the appropriate hospital and all the  
25 necessary care will be ensured and followed-up until the participant has resolved or stabilized.  
26  
27  
28

### 29 **What will happen if you don't carry on with the study?**

30  
31 If you withdraw from the study all the information and data collected from you, to date, will be destroyed  
32 and your name would be removed from all the research study files. There will not be any loss or impact  
33 on your routine medical care which you are entitled to.  
34  
35  
36

### 37 **What will happen to the results of the research study?**

38  
39 The results of all the participants of the study will be used for scientific research. All data will be  
40 available only to the researchers and information provided will be strictly confidential. Your participation  
41 in the study is highly appreciated. Privacy and confidentiality of data gathered is completely secure and  
42 will be used only for research purposes. If you have any questions or any concerns with regards to the  
43 study and need further information you can call the telephone number listed below. Further you can send  
44 any complaint to the above postal address or email address.  
45  
46  
47

48 Yours faithfully

49 Prof. S.W. Wimalasekera

50 Department of Physiology, Faculty of Medical Sciences, University of Sri Jayewardenepura

51 T.P No. 0777487203 e-mail : [savithriww@yahoo.com](mailto:savithriww@yahoo.com)

52 Ethics Review Committee – University of Sri Jayewardenepura - +94 11 2758000 Ext 4075e  
53  
54  
55  
56  
57  
58  
59  
60

**Consent Form: Randomised Controlled Feasibility Trial**

**Cultural adaptation of Pulmonary Rehabilitation and subsequent testing in a Randomised Controlled Feasibility Trial for Adults with Chronic Obstructive Pulmonary Disease in Sri Lanka**

- 1. Have you read the information sheet? (please keep a copy for yourself) YES/NO
- 2. Have you had an opportunity to discuss this and ask any questions? YES/NO
- 3. Have you had satisfactory answers to all your questions? YES/NO
- 4. Have you received enough information about the study? YES/NO
- 5. Who explained the study to you-----
- 6. Do you understand that you are free to withdraw from the study at any time,  
without having to give a reason YES/NO
- 7. All personal details will be treated as STRICTLY CONFIDENTIAL.  
Do you give your permission for these individuals to have access to the records? YES/NO
- 8. Have you had sufficient time to come to your decision? YES/NO
- 9. Do you agree to take part in this study? YES/NO

Participant's signature ----- Date-----

**By the Witness**

I have been present while the procedure was explained to the participant and I have witness his/ her willingness to take part in the study.

Signature of witness----- Date-----

(The witness should be a person not connected to the study)

Name -----

Contact details-----
